# Supplementary material
Source: publisher figshare collection journal article supplement (https://acs.figshare.com/ndownloader/files/24027941)
Supplement: Supplementary file 1 [file 24027941]

# Supporting Information

## Metal-Free and Regioselective Synthesis of Substituted and Fused Chromenopyrrole Scaffolds *via* the Divergent Reactivity of $\alpha$ -Azido Ketones in Water

Elumalai Dhanasekar,<sup>†</sup> Tharanikkarasu Kannan,<sup>†</sup> Rengarajan Venkatesan,<sup>†</sup> Paramasivam Thirumalai Perumal,<sup>‡</sup> Jayabal Kamalraja<sup>\*,†</sup>

<sup>†</sup> Department of Chemistry, Pondicherry University, R.V. Nagar, Kalapet, Puducherry-605 014, India.

<sup>‡</sup> Department of Chemistry, B.S. Abdur Rahman Crescent Institute of Science & Technology, Vandalur, Chennai – 600048, India.

E-mail: [jkamalraja@yahoo.com](mailto:jkamalraja@yahoo.com); [ptperumal@crescent.education](mailto:ptperumal@crescent.education)

## Table of Contents

| S.No | Page No                                                                                                                                                                          |
|------|----------------------------------------------------------------------------------------------------------------------------------------------------------------------------------|
| I.   | A brief discussion of the spectral characterization<br>of compounds <b>4d</b> , <b>4q</b> , <b>8a</b> , <b>10a</b> , <b>12b</b> , <b>15a</b> , <b>17b</b> and <b>18a</b> .....S2 |
| II.  | Copies of <sup>1</sup> H, <sup>13</sup> C{ <sup>1</sup> H} and DEPT 135 NMR & HRMS (ESI) Spectra.....S7                                                                          |
| III. | Experimental Details of X-ray analysis of Compound <b>4i</b> .....S90                                                                                                            |
| IV.  | ORTEP diagram of compound <b>4i</b> .....S91                                                                                                                                     |
| V.   | Crystal data and structure refinement for <b>4i</b> .....S92                                                                                                                     |
| VI.  | Green matrix Factors: Atom Economy and E-Factor Calculations.....S93                                                                                                             |

## I. A brief discussion of the spectral characterization of compounds 4d, 4q, 8a, 10a, 12b, 15a, 17b and 18a

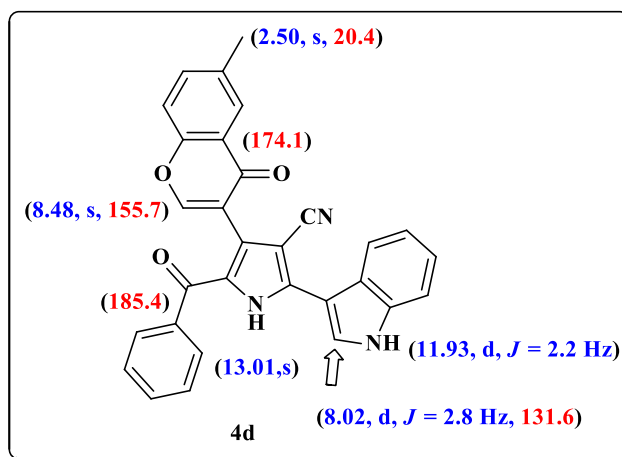

In the  $^1\text{H}$  NMR spectra of a compound **4d**, a peak that appears at 13.01 ppm for one proton belongs to the pyrrole  $-\text{NH}$ , a doublet that appears at 11.93 ppm with the coupling constant of 2.2 Hz for one proton belongs to the indole  $-\text{NH}$ , a singlet appears at 8.48 ppm for one proton belongs to the  $-\text{CH}$  of chromone ring, a doublet appears at 8.02 ppm with the coupling constant of 2.8 Hz for one proton belongs to  $-\text{CH}$  of indole ring and a peak appears as a singlet at 2.50 ppm for three protons belongs to the  $-\text{CH}_3$  of chromone ring. Similarly in  $^{13}\text{C}$  NMR spectra of a compound **4d**, a peak appears at 185.4 ppm belongs to the carbonyl carbon of benzoyl group, a peak appears at 174.1 ppm belongs to the carbonyl carbon of chromone ring, a peak appears at 155.7 ppm belongs to the  $-\text{CH}$  carbon of chromone ring and a peak that appears at 20.4 ppm belongs to the  $-\text{CH}_3$  of chromone ring. Further, the structure of **4d** was confirmed by high resolution mass (HRMS-ESI) spectra of the molecular ion peak  $[\text{M} + \text{H}]^+$  appears at 470.1533 indicate that the confirmation of product formation.

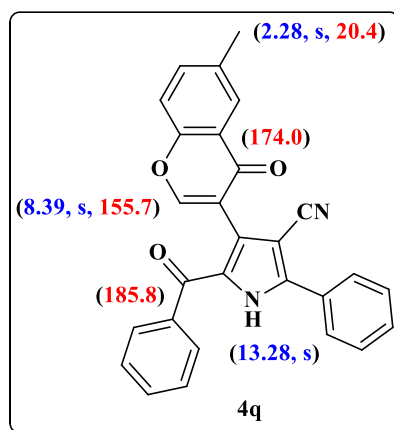

In the  $^1\text{H}$  NMR spectra of a compound **4q**, a peak that appears at 13.28 ppm for one proton belongs to the pyrrole  $-\text{NH}$ , a singlet appears at 8.39 ppm for one proton belongs to the  $-\text{CH}$  of chromone ring and a peak appears as a singlet at 2.28 ppm for three protons that belongs

to the  $-\text{CH}_3$  of chromone ring. Similarly in  $^{13}\text{C}$  NMR spectra of a compound **4q**, a peak appears at 185.8 ppm belongs to the carbonyl carbon of benzoyl group, a peak appears at 174.0 ppm belongs to the carbonyl carbon of chromone ring, a peak appears at 155.7 ppm belongs to the  $-\text{CH}$  carbon of chromone ring and a peak that appears at 20.4 ppm belongs to the  $-\text{CH}_3$  of chromone ring. Further, the structure of **4q** was confirmed by high resolution mass (HRMS-ESI) spectra of the molecular ion peak  $[\text{M} + \text{H}]^+$  appears at 431.1396 indicate that the confirmation of product formation.

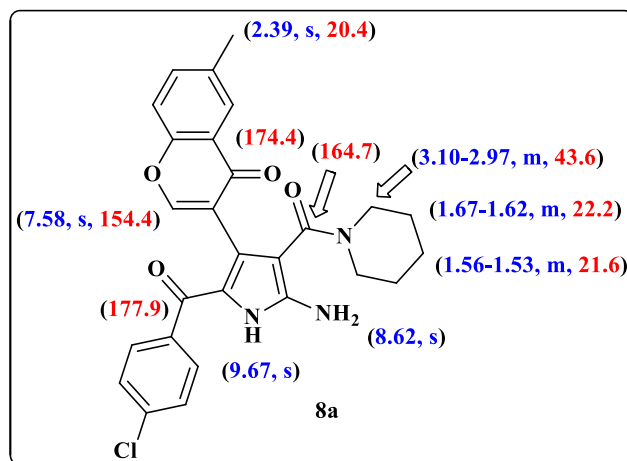

In the  $^1\text{H}$  NMR spectra of a compound **8a**, a singlet appears at 9.67 ppm for one proton belongs to the pyrrole  $-\text{NH}$ , a broad singlet appears at 8.62 ppm for two protons belongs to the  $-\text{NH}_2$  of pyrrole, a singlet appears at 7.58 ppm for one proton belongs to the  $-\text{CH}$  of chromone ring, a multiplet appears at 3.10 – 2.97 ppm for four protons belong to  $-\text{CH}_2$  of piperidine ring (Adjacent to ring nitrogen), a singlet appears at 2.39 ppm belongs to the  $-\text{CH}_3$  protons from chromone ring, a multiplet appears at 1.67 – 1.62 ppm for four protons belong to  $-\text{CH}_2$  protons of piperidine ring and a multiplet appears at 1.56 - 1.53 ppm for two protons belong to  $-\text{CH}_2$  protons of the piperidine ring. Similarly in  $^{13}\text{C}$  NMR spectra of a compound **8a**, a peak appears at 177.9 ppm belongs to the carbonyl carbon of benzoyl group, a peak appears at 174.4 ppm belongs to the carbonyl carbon of chromone ring, a peak appears at 164.7 ppm belongs to the carbonyl group attached with piperidine ring, a peak appears at 154.4 ppm belongs to the  $-\text{CH}$  of chromone ring, a peak appears at 43.6 belong to two aliphatic  $-\text{CH}_2$  of piperidine ring (Adjacent to ring nitrogen), a peak appears at 22.2 ppm belong to two aliphatic  $-\text{CH}_2$  of piperidine ring, a peak appears at 21.6 ppm belong to one aliphatic  $-\text{CH}_2$  of piperidine ring and a peak appears at 20.4 ppm belongs to the  $-\text{CH}_3$  of chromone ring. Further, the structure of **8a** was confirmed by high resolution mass (HRMS-ESI) spectra of the molecular ion peak  $[\text{M} + \text{H}]^+$  appears at 490.1516 indicate that the confirmation of product formation.

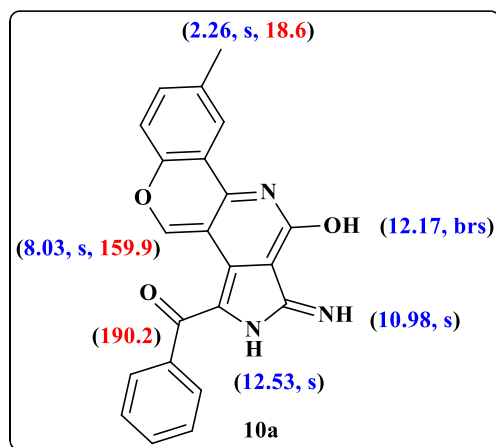

In the  $^1\text{H}$  NMR spectra of a compound **10a**, a singlet appears at 12.53 ppm for one proton belongs to the pyrrole  $-\text{NH}$ , a broad singlet appears at 12.17 ppm for one proton belongs to the  $-\text{OH}$  of the pyridine ring, a singlet appears at 10.98 ppm for one proton belongs to the imine  $-\text{NH}$  of pyrrole ring and a peak appears at 2.26 ppm for three protons belongs to the  $-\text{CH}_3$  of chromone ring. Similarly in  $^{13}\text{C}$  NMR spectra of a compound **10a**, a peak appears at 190.2 ppm belongs to the carbonyl carbon of benzoyl group. A peak appears at 159.9 ppm belongs to the  $-\text{CH}$  of chromone ring and a peak appears at 18.6 ppm belongs to the  $-\text{CH}_3$  of chromone ring.

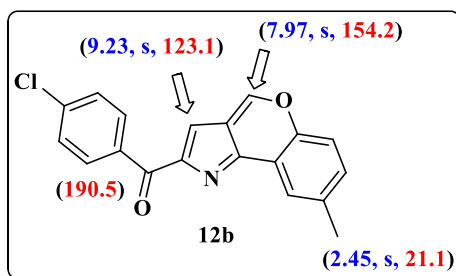

In the  $^1\text{H}$  NMR spectra of a compound **12b**, a singlet appears at 9.23 ppm for one proton belongs to the  $-\text{CH}$  of pyrrole ring, a singlet appears at 7.97 ppm for one proton belongs to the  $-\text{CH}$  of chromone ring and a peak appears at 2.45 ppm for three protons belongs to the  $-\text{CH}_3$  of chromone ring. Similarly in  $^{13}\text{C}$  NMR spectra of a compound **12b**, a peak appears at 190.5 ppm belongs to the carbonyl carbon of benzoyl group, a peak appears at 154.2 ppm belongs to the  $-\text{CH}$  of chromone ring, a peak appears at 123.1 ppm belongs to the  $-\text{CH}$  of pyrrole ring and a peak appears at the 21.1 ppm belongs to the  $-\text{CH}_3$  of chromone ring. Further, the structure of **12b** was confirmed by high resolution mass (HRMS-ESI) spectra of the molecular ion peak  $[\text{M} - \text{H} + \text{H}_2\text{O}]^+$  appears at 338.0599 indicate that the confirmation of product formation.

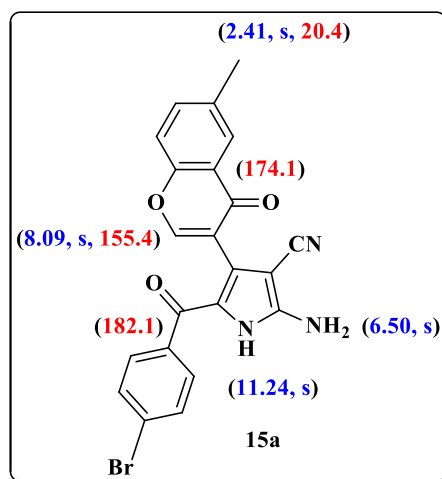

In the  $^1\text{H}$  NMR spectra of a compound **15a**, a singlet appears at 11.24 ppm for one proton belongs to the pyrrole –NH, a singlet appears at 8.09 ppm for one proton belongs to the –CH of chromone ring. A peak appears at 6.50 ppm for two protons belongs to the –NH<sub>2</sub> of pyrrole ring and a peak appears at 2.41 ppm for three protons belongs to the –CH<sub>3</sub> of chromone ring. Similarly in  $^{13}\text{C}$  NMR spectra of a compound **15a**, a peak appears at 182.1 ppm belongs to the carbonyl carbon of benzoyl group, a peak appears at 174.1 ppm belongs to the carbonyl group of chromone ring, a singlet appears at 155.4 ppm belongs to the –CH of chromone ring and a peak appears at the 20.4 ppm belongs to the –CH<sub>3</sub> of chromone ring.

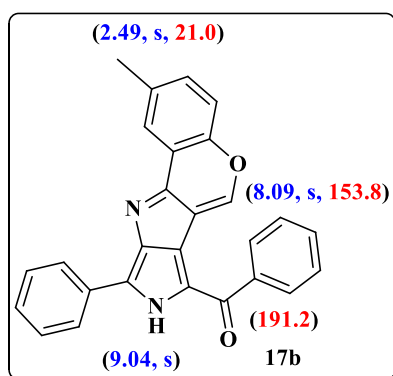

In the  $^1\text{H}$  NMR spectra of a compound **17b**, a singlet appears at 9.04 ppm for one proton belongs to the pyrrole ring –NH, a singlet appears at 8.09 ppm for one proton belongs to the –CH of chromone ring and a singlet appears at 2.49 ppm for three protons belongs to the –CH<sub>3</sub> of chromone ring. Similarly in  $^{13}\text{C}$  NMR spectra of a compound **15a**, a peak appears at 191.2 ppm belongs to the carbonyl carbon of benzoyl group, a peak appears at 153.8 ppm belongs to the –CH of chromone ring and a peak appears at the 21.0 ppm belongs to the –CH<sub>3</sub> of chromone ring. In addition, the DEPT 135 spectrum also confirms that the presence of ten aromatic –CH and one aliphatic –CH<sub>3</sub> in the positive phase. Further, the structure of **12b** was confirmed by high resolution mass (HRMS-ESI) spectra of the molecular ion peak  $[\text{M}+\text{H}_2\text{O}]^+$  appears at 420.1224 indicate that the confirmation of product formation.

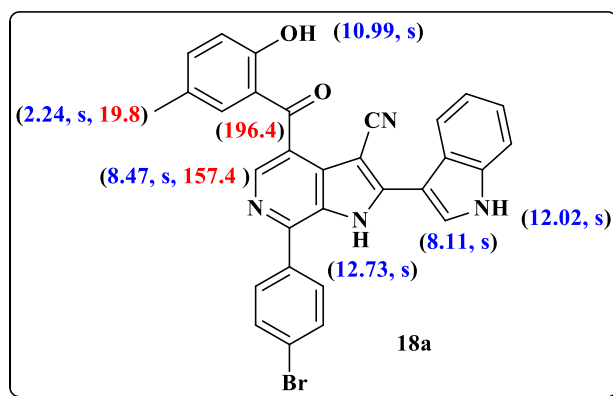

In the  $^1\text{H}$  NMR spectra of a compound **18a**, a singlet appears at 12.73 ppm for one proton belongs to the  $-\text{NH}$  of the pyrrole ring, a singlet appears at 12.02 ppm for one proton belongs to the  $-\text{NH}$  of the indole ring. A peak appears 10.99 ppm for one proton belongs to the  $-\text{OH}$  of the benzene ring, a singlet appears at 8.47 ppm for one proton belongs to the  $-\text{CH}$  of the pyridine ring, a peak appears at 8.11 ppm as a singlet for one proton belongs to the  $-\text{CH}$  of the indole ring, a singlet appears at 2.24 ppm for three protons belongs to the  $-\text{CH}_3$  of the benzene ring. Similarly in  $^{13}\text{C}$  NMR spectra of a compound **18a**, a peak appears at 196.4 ppm belongs to the carbonyl carbon of the benzoyl group, a peak appears at 157.4 ppm belongs to the  $-\text{CH}$  carbon of the pyridine ring and a peak appears at the 19.8 ppm belongs to the  $-\text{CH}_3$  of the benzene ring. In addition, the DEPT 135 spectrum also confirms that the presence of eleven aromatic  $-\text{CH}$  and one aliphatic  $-\text{CH}_3$  in the positive phase. Further, the structure of **18a** was confirmed by high resolution mass (HRMS-ESI) spectra of the molecular ion peak  $[\text{M}+\text{H}]^+$  appears at 547.0778 indicate that the confirmation of product formation.

# I. $^1\text{H}$ NMR, $^{13}\text{C}\{^1\text{H}\}$ NMR and HRMS (ESI) spectrum

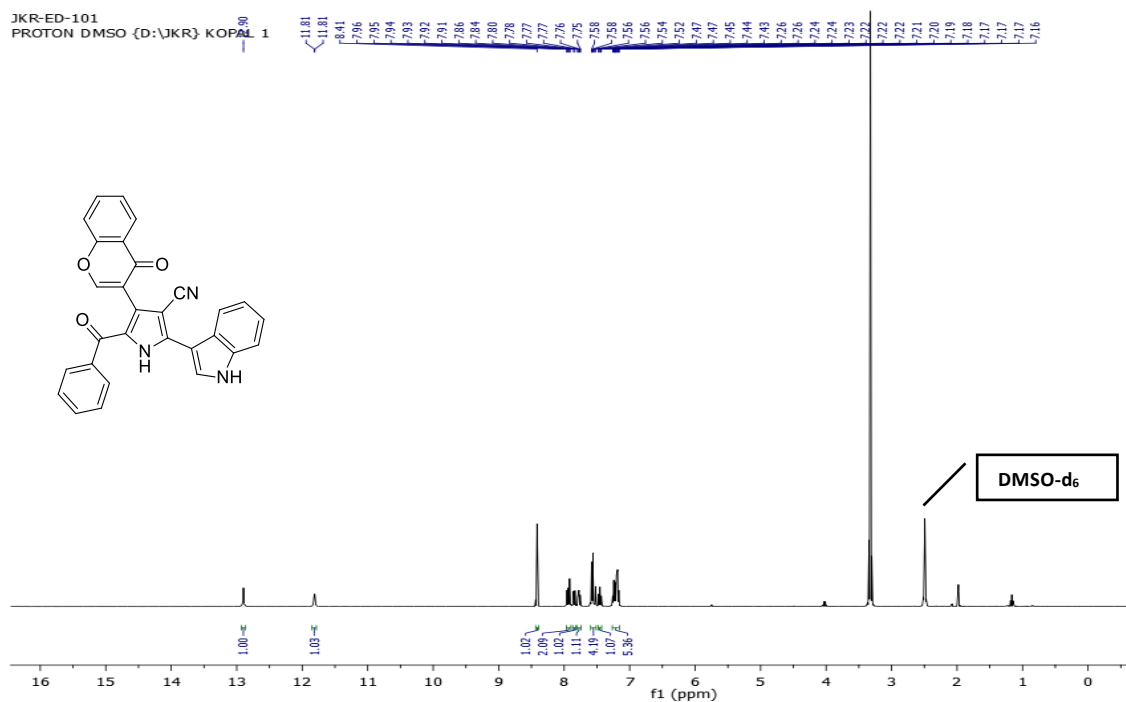

$^1\text{H}$  NMR spectrum of **4a** (400 MHz, DMSO- $d_6$ )

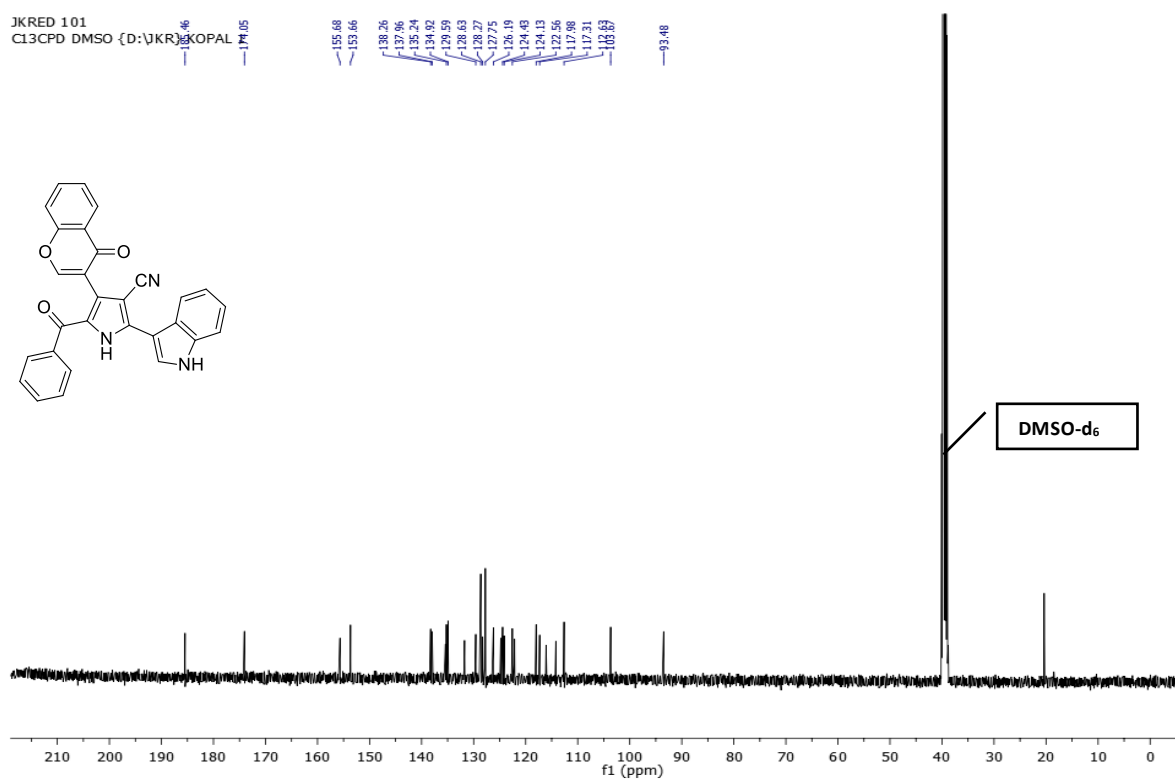

$^{13}\text{C}\{^1\text{H}\}$  NMR spectrum of **4a** (100 MHz, DMSO- $d_6$ )

JKRED 101  
 CL3DEPT135 DMSO {D:\JKR} KOPAL 1

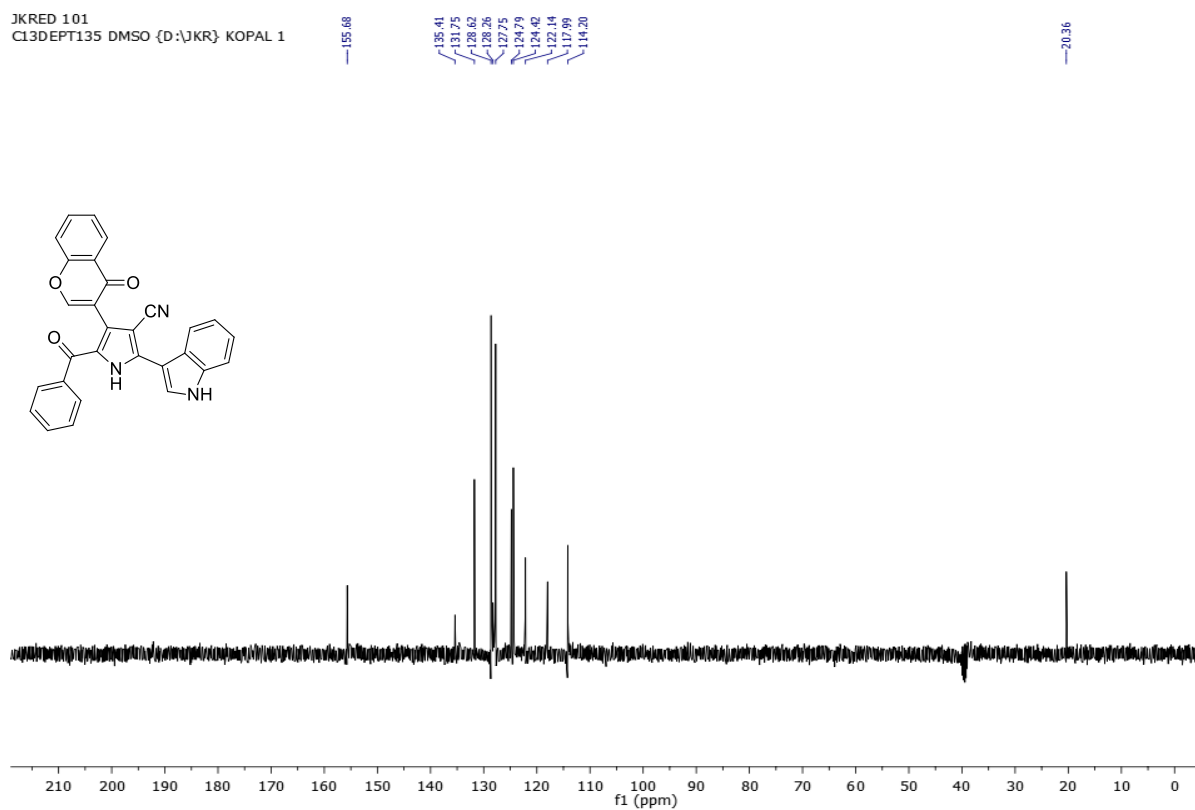

DEPT 135 NMR spectrum of **4a** (100 MHz, DMSO-*d*<sub>6</sub>)

| Sample Name   | Position             | Instrument Name | User Name              |
|---------------|----------------------|-----------------|------------------------|
| JKR-ED-101    | JKR-ED-101           | Q-TOF           | QTOF-PU\admin          |
| Inj Vol       | InjPosition          | SampleType      | IRM Calibration Status |
| -1            | -1                   | Sample          | Success                |
| Data Filename | ACQ Method           | Comment         | Acquired Time          |
| JKR-ED-101.d  | Pondicherry Universi | ED-JKR-455.13   | 18-04-2018 14:39:14    |

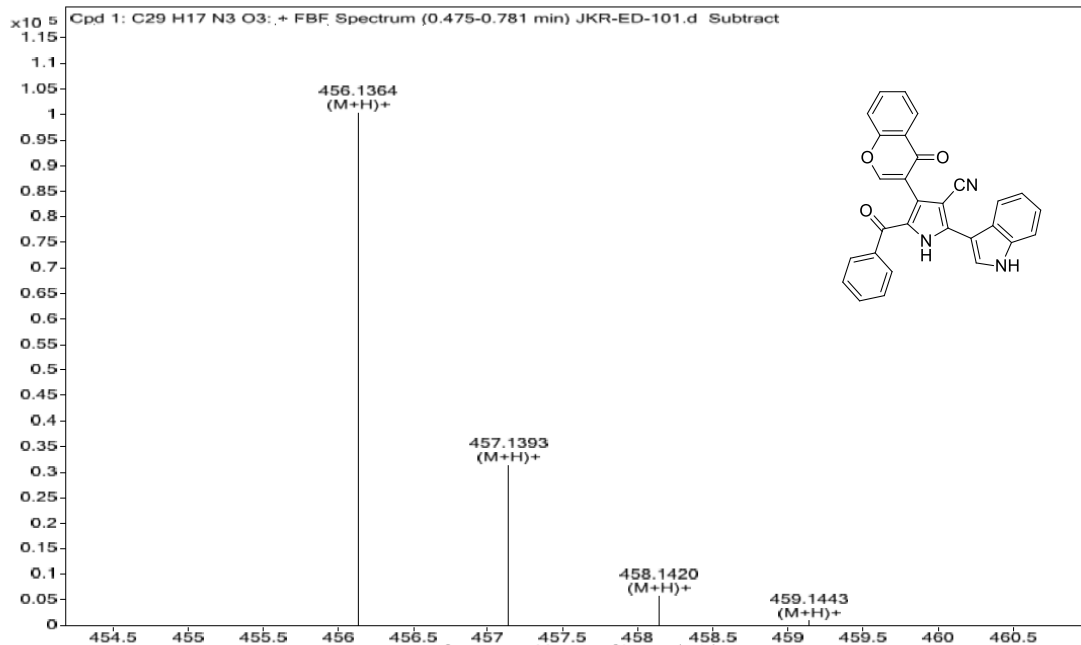

HRMS (ESI) spectrum of **4a**



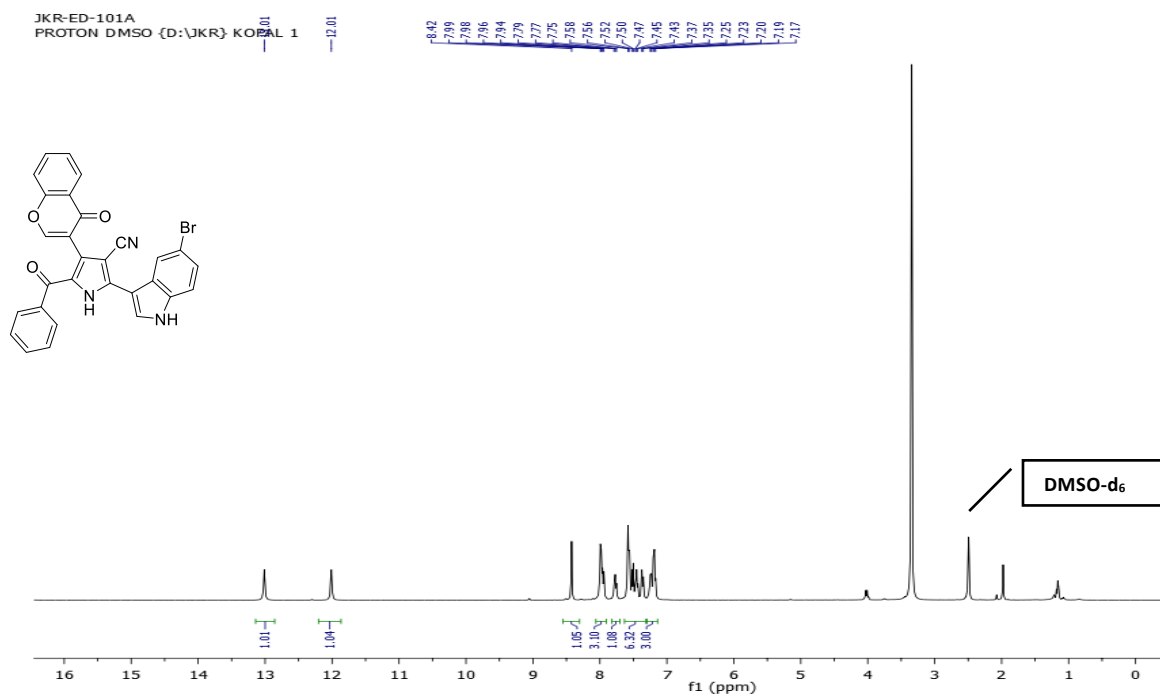

<sup>1</sup>H NMR spectrum of **4b** (400 MHz, DMSO-*d*<sub>6</sub>)

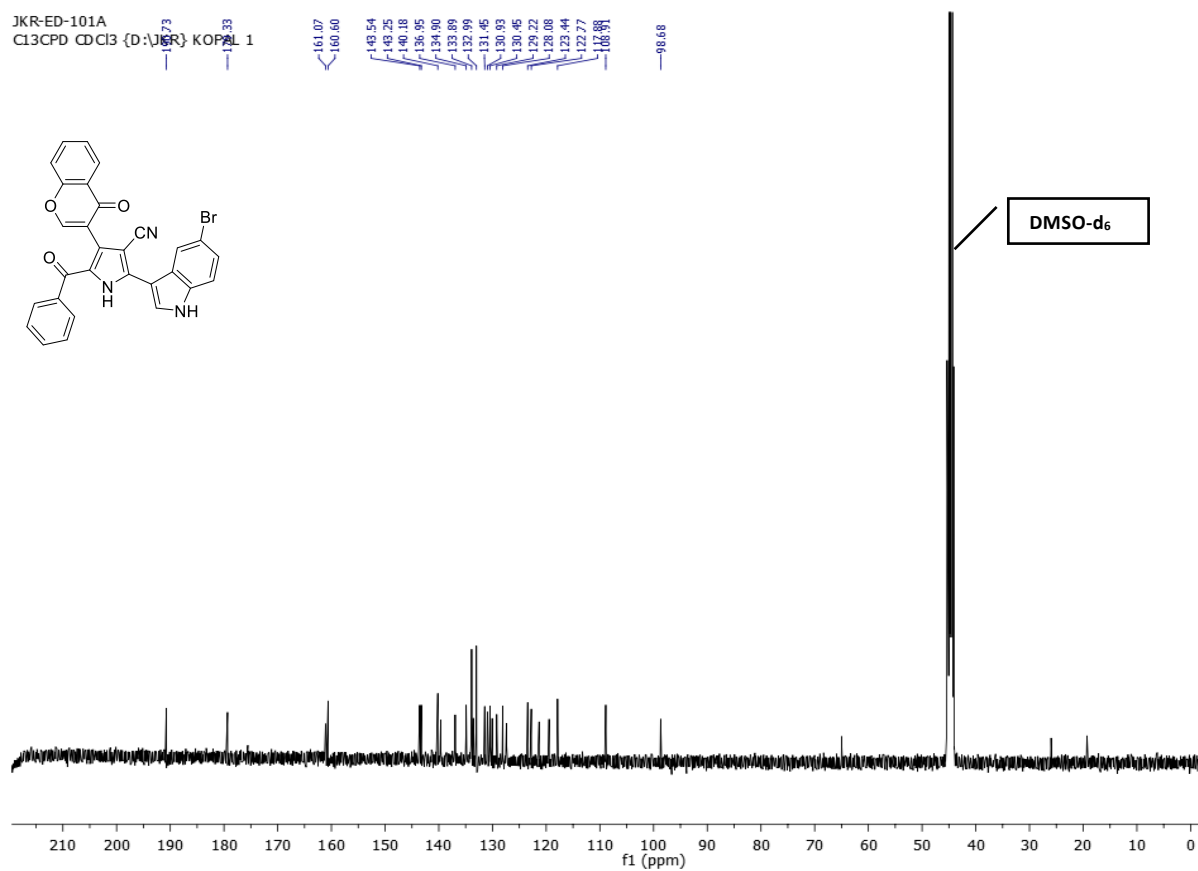

<sup>13</sup>C{<sup>1</sup>H} NMR spectrum of **4b** (100 MHz, DMSO-*d*<sub>6</sub>)

JKR-ED-101A  
 Cl3DEPT135 CDCl3 {D:JKR} KOPAL 1

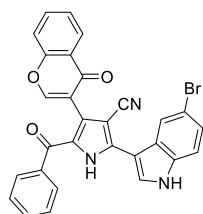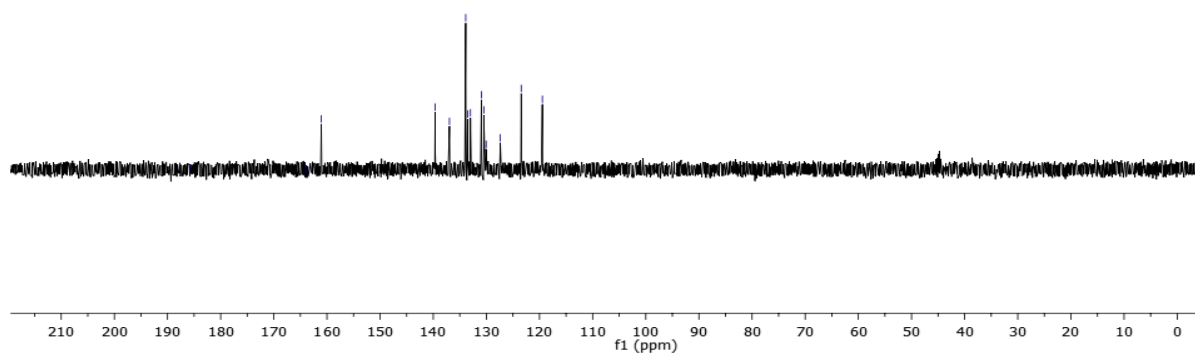

DEPT 135 NMR spectrum of **4b** (100 MHz, DMSO- $d_6$ )

| Name           | Position             | Instrument Name | User Name              |
|----------------|----------------------|-----------------|------------------------|
| JKR-ED-101 A   | -1                   | Q-TOF           | QTOF-PU\admin          |
| ename          | InjPosition          | SampleType      | IRM Calibration Status |
| JKR-ED-101 A.d | Pondicherry Universi | Sample          | Success                |
| ACQ Method     | Comment              | JKR-ED-533.0375 | Acquired Time          |
|                |                      |                 | 4/19/2018 2:35:17 PM   |

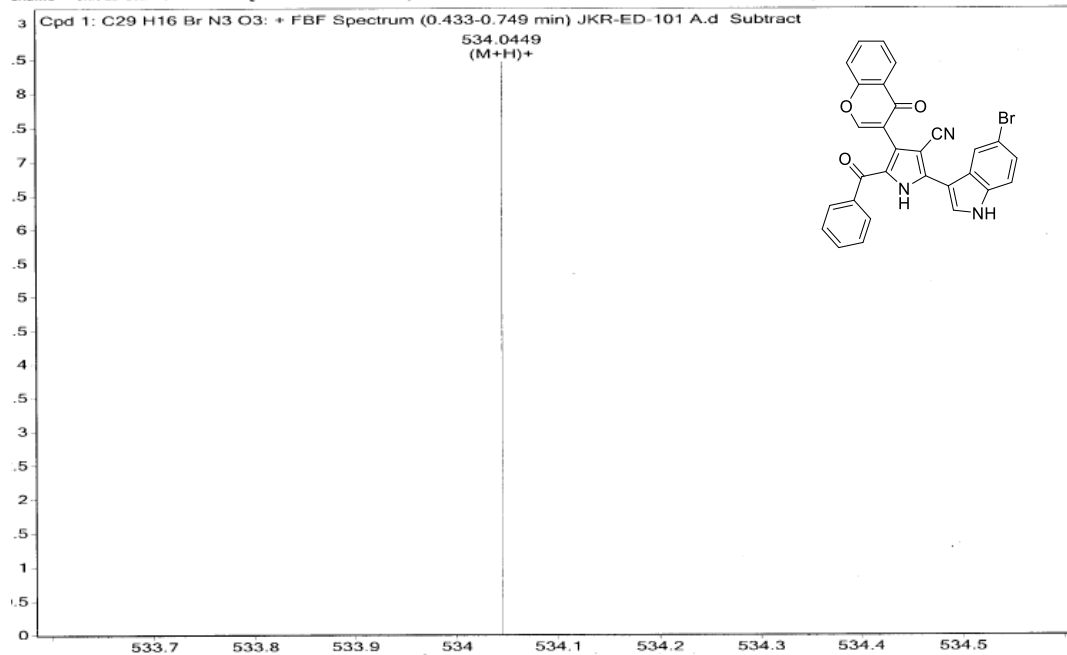

HRMS (ESI) spectrum of **4b** ( $^{79}\text{Br}$  isotope)

| Name           | Position             | Instrument Name | Q-TOF           | User Name              | QTOF-PU\admin        |
|----------------|----------------------|-----------------|-----------------|------------------------|----------------------|
| JKR-ED-101 A   | -1                   | Sample          | JKR-ED-533.0375 | Success                |                      |
| ename          | ACQ Method           | SampleType      | Comment         | IRM Calibration Status | Acquired Time        |
| JKR-ED-101 A.d | Pondicherry Universi |                 |                 | Success                | 4/19/2018 2:35:17 PM |

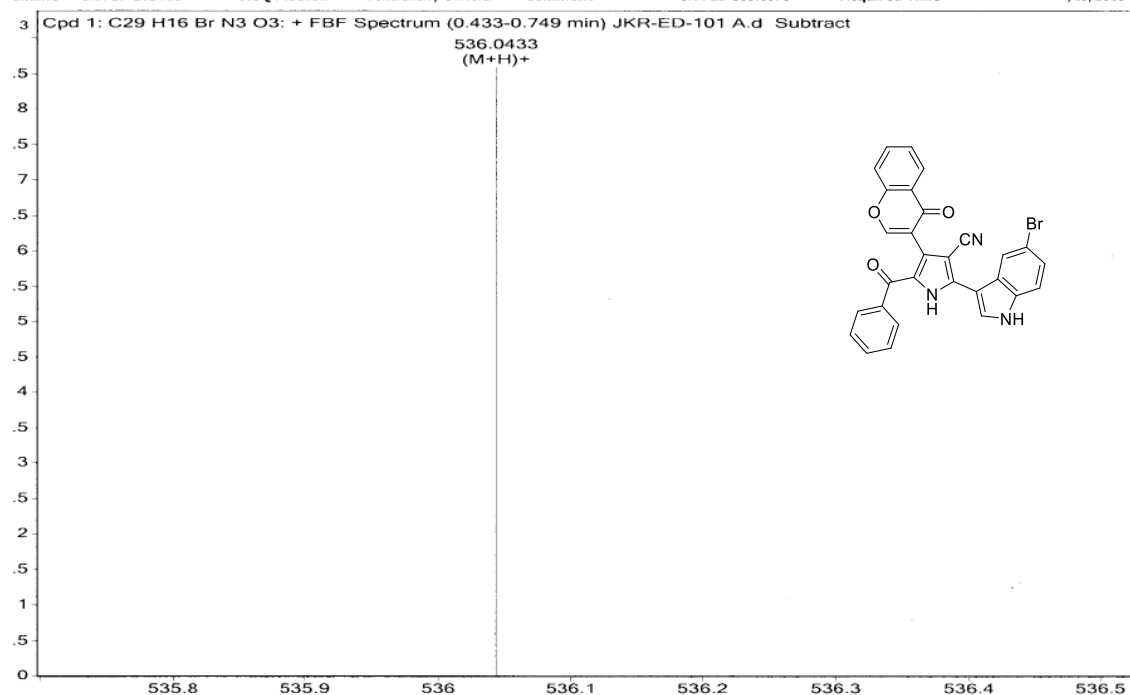

HRMS (ESI) spectrum of **4b** (<sup>81</sup>Br isotope)

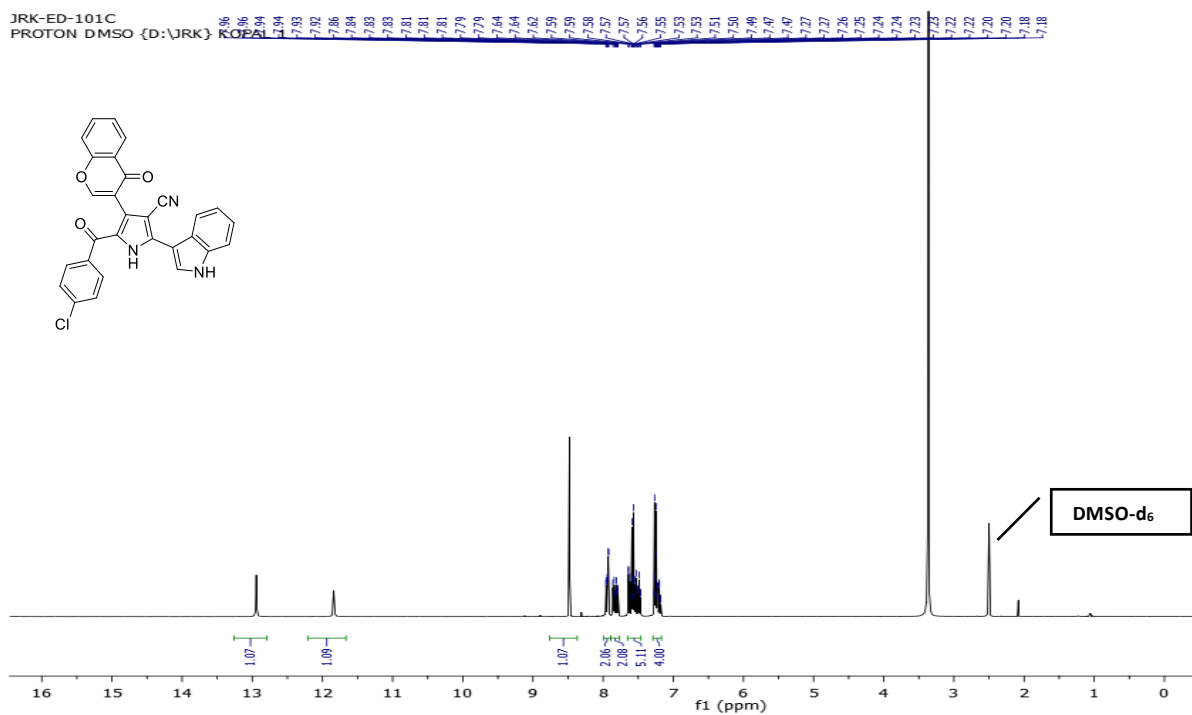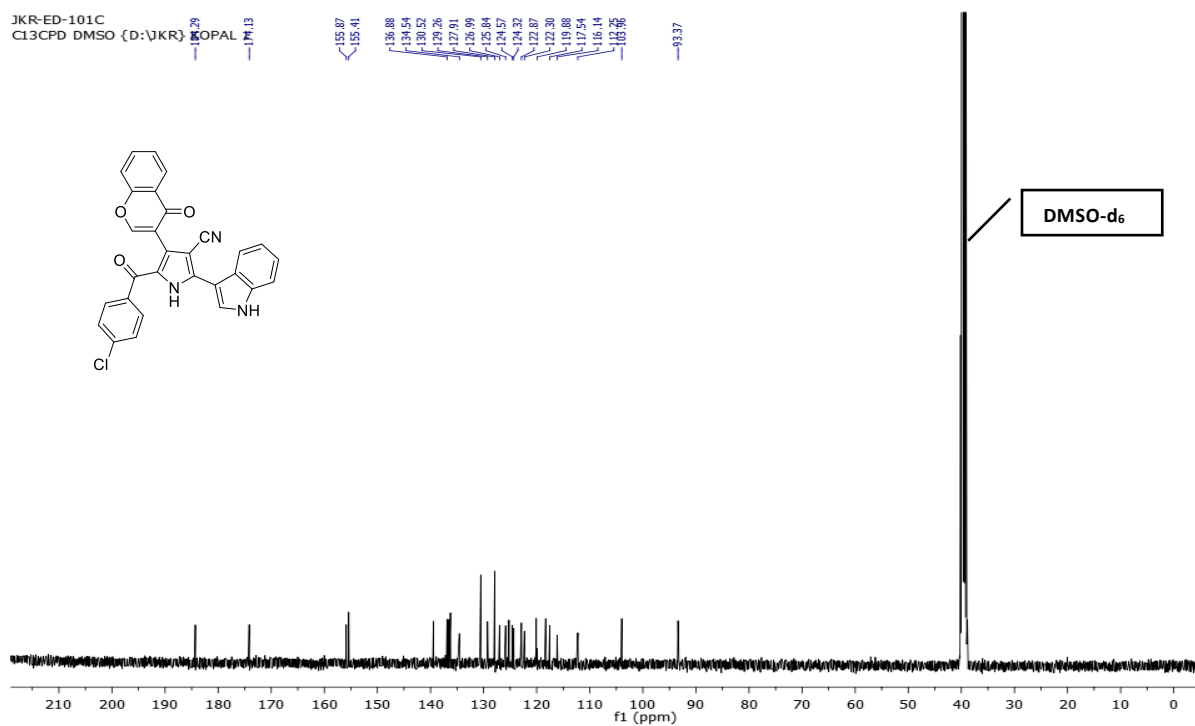

JKR-ED-101C  
 CL3DEPT135 DMSO {D:\JKR} KOPAL 1

155.80  
 134.47  
 130.45  
 127.84  
 126.91  
 125.77  
 125.15  
 122.23  
 120.01  
 119.80  
 118.22  
 112.18

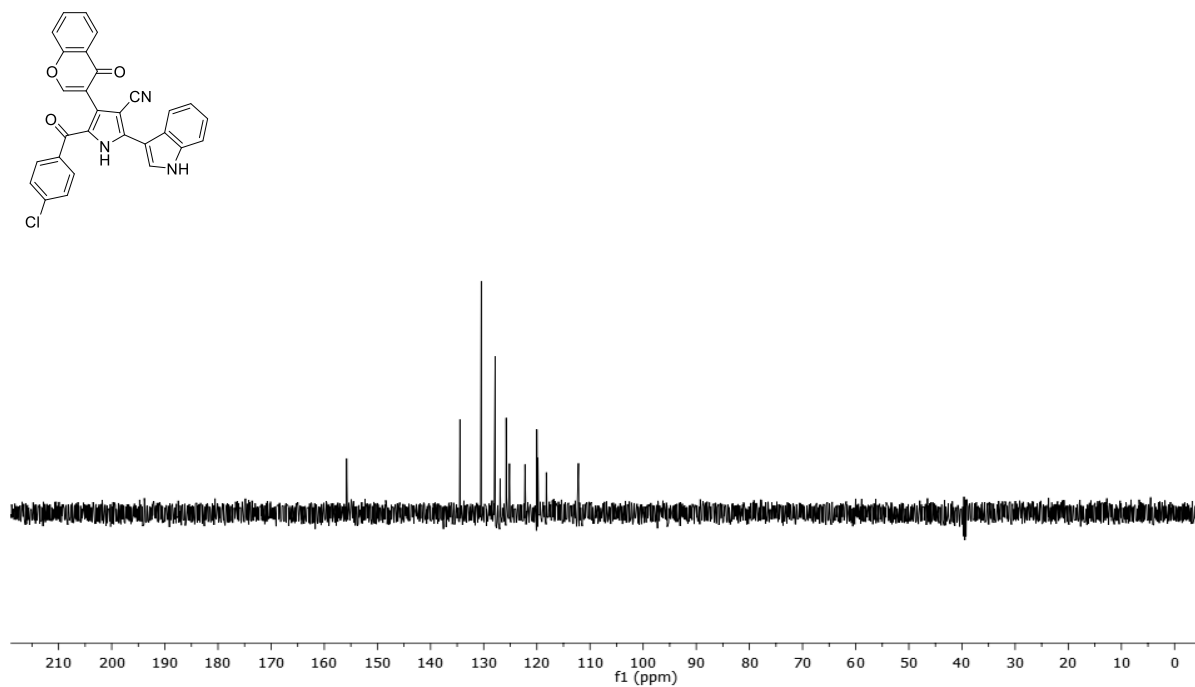

| Sample Name   | JKR-ED-101 C   | Position    | Instrument Name | Q-TOF           | User Name              | QTOF-PU\admin       |
|---------------|----------------|-------------|-----------------|-----------------|------------------------|---------------------|
| Inj Vol       | -1             | InjPosition | SampleType      | Sample          | IRM Calibration Status | Success             |
| Data Filename | JKR-ED-101 C.d | ACQ Method  | Comment         | JKR-ED-489.0880 | Acquired Time          | 19-04-2018 14:27:32 |

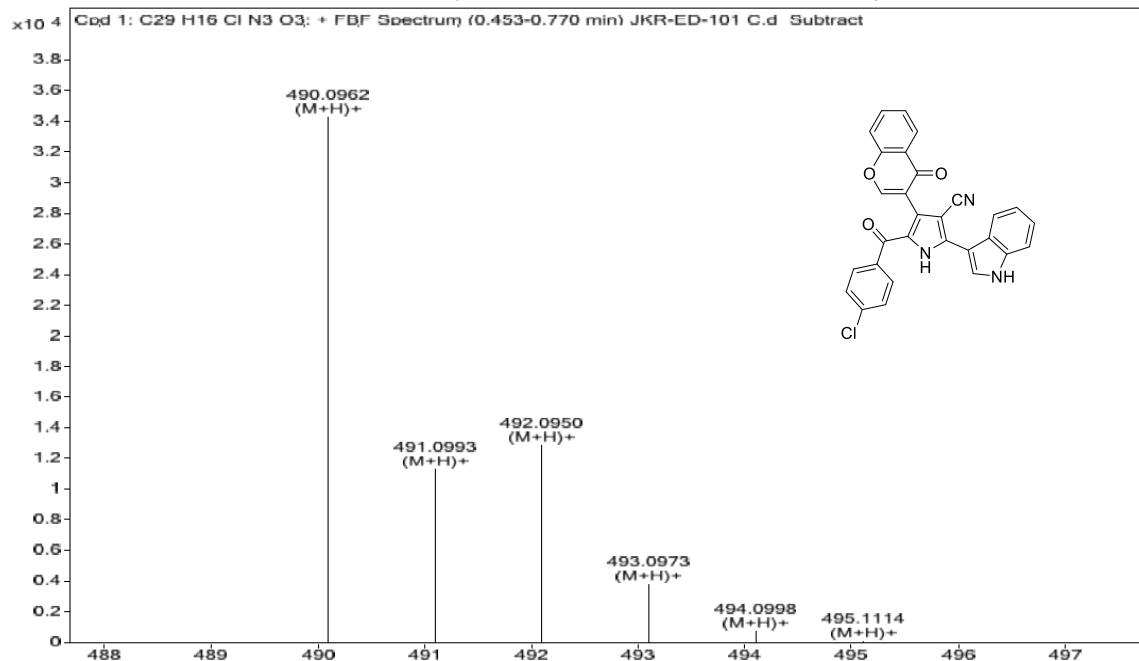

HRMS (ESI) spectrum of **4c**

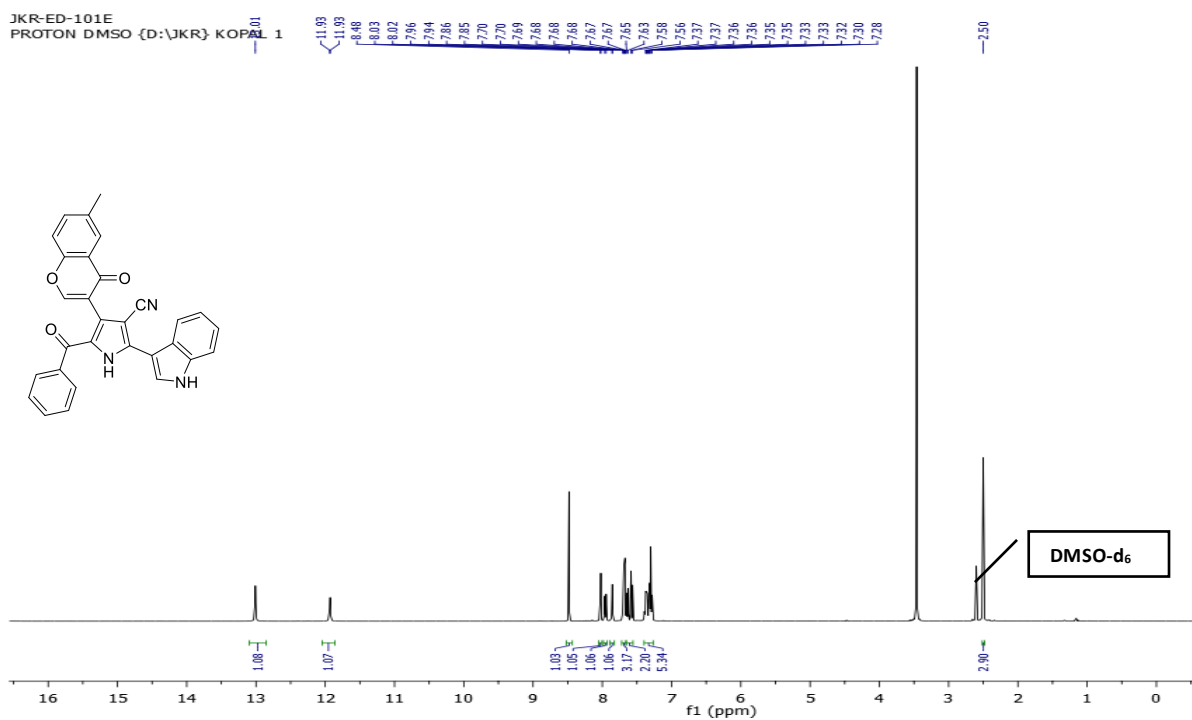

$^1\text{H}$  NMR spectrum of **4d** (400 MHz, DMSO- $d_6$ )

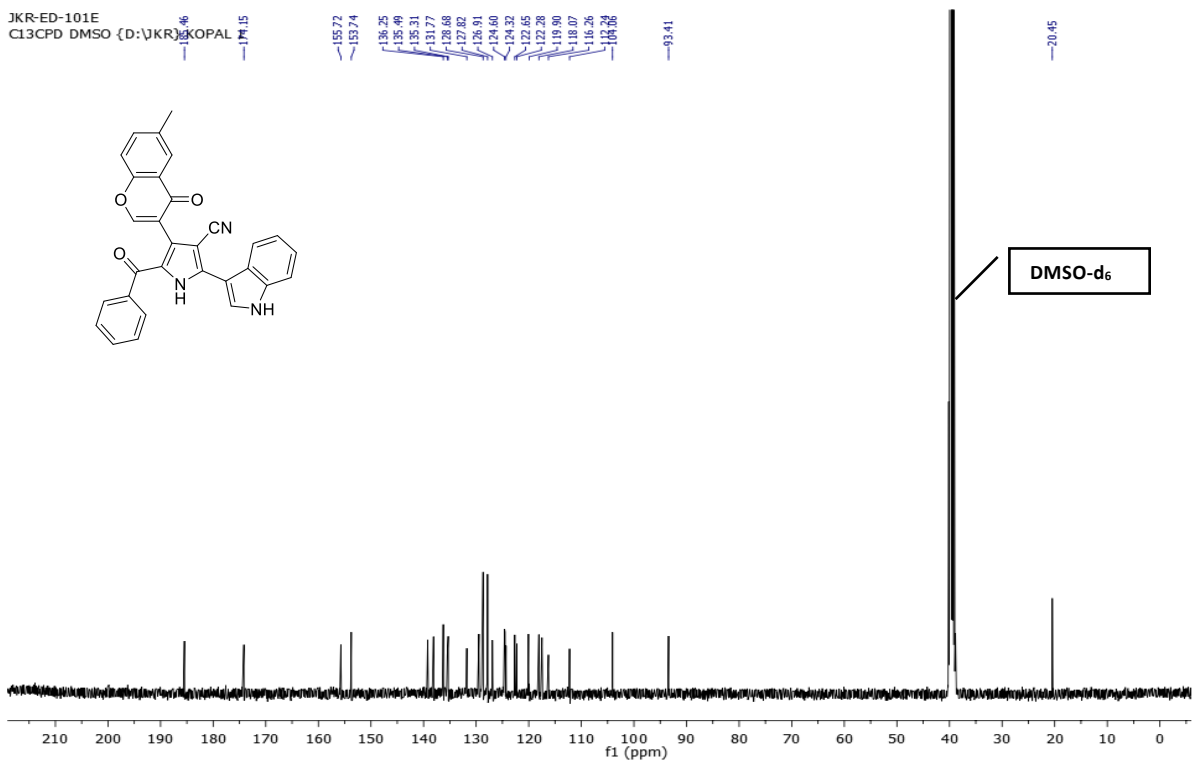

$^{13}\text{C}\{^1\text{H}\}$  NMR spectrum of **4d** (100 MHz, DMSO- $d_6$ )

JKR-ED-101E  
C13DEPT135 DMSO {D:\JKR} KOPAL 1

155.64  
135.41  
131.69  
128.60  
127.74  
126.83  
124.42  
122.20  
119.97  
118.00  
112.17  
20.38

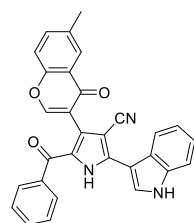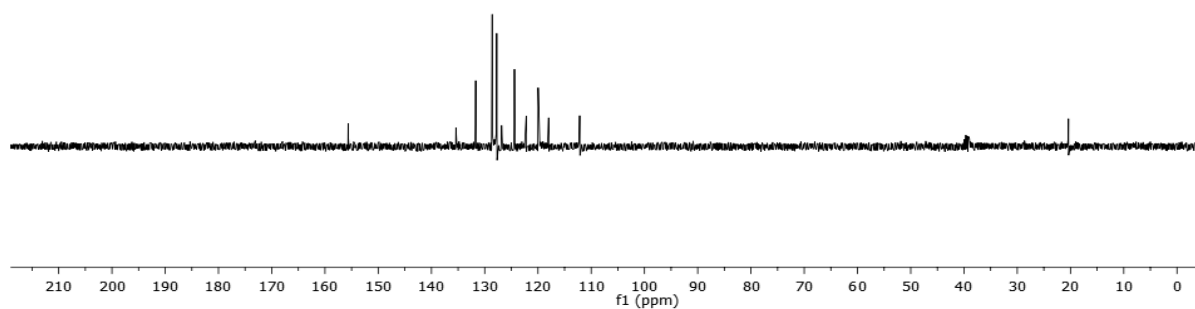

DEPT 135 NMR spectrum of **4d** (100 MHz, DMSO-*d*<sub>6</sub>)

| Sample Name   | JKR-ED-101E   | Position    | Instrument Name | Q-TOF         | User Name              | QTOF-PU\admin       |
|---------------|---------------|-------------|-----------------|---------------|------------------------|---------------------|
| Inj Vol       | -1            | InjPosition | SampleType      | Sample        | IRM Calibration Status | Success             |
| Data Filename | JKR-ED-101E.d | ACQ Method  | Comment         | ED-JKR-471.52 | Acquired Time          | 23-04-2018 12:10:19 |

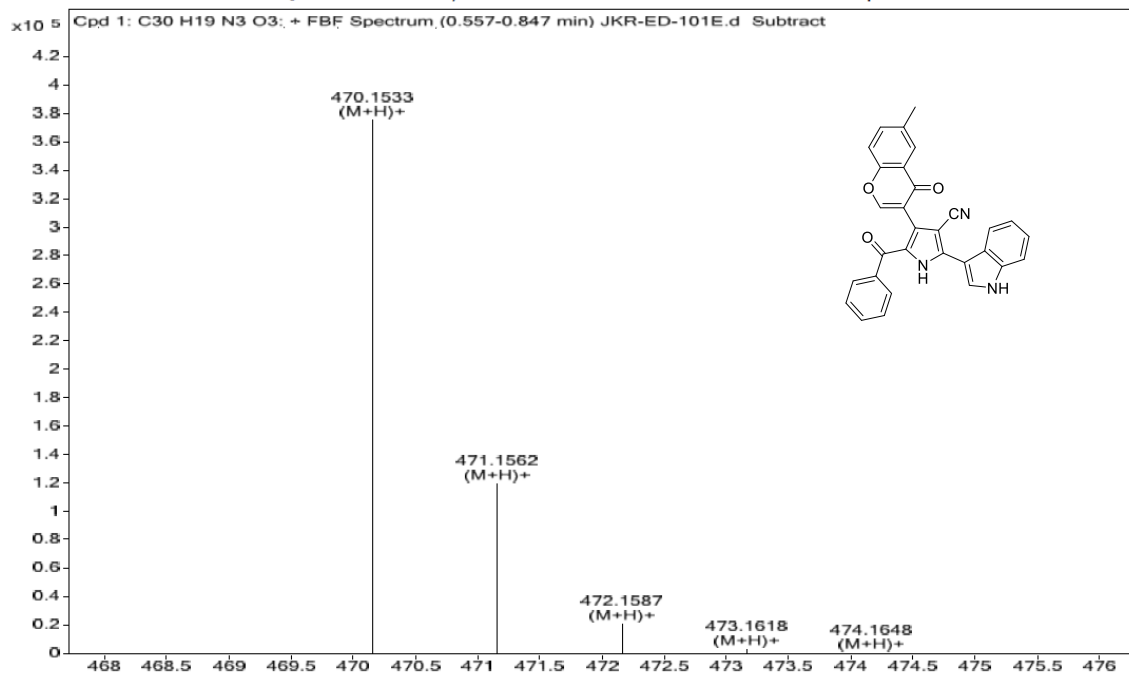

HRMS (ESI) spectrum of **4d**

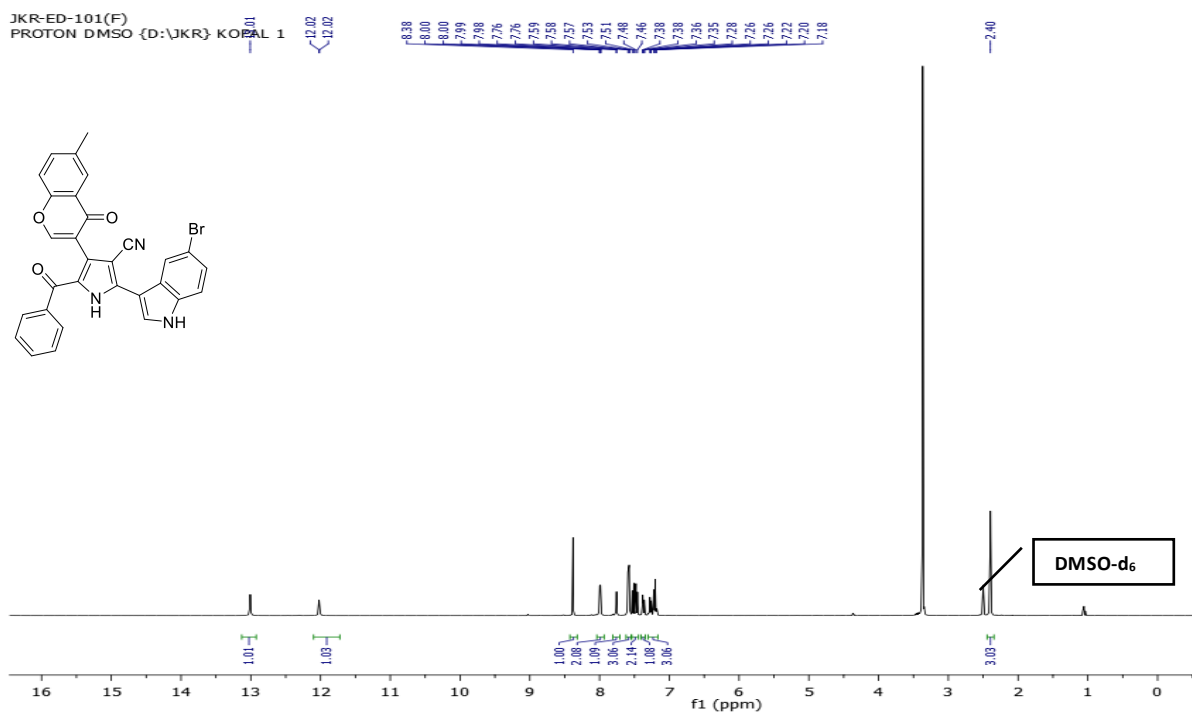

<sup>1</sup>H NMR spectrum of **4e** (400 MHz, DMSO-*d*<sub>6</sub>)

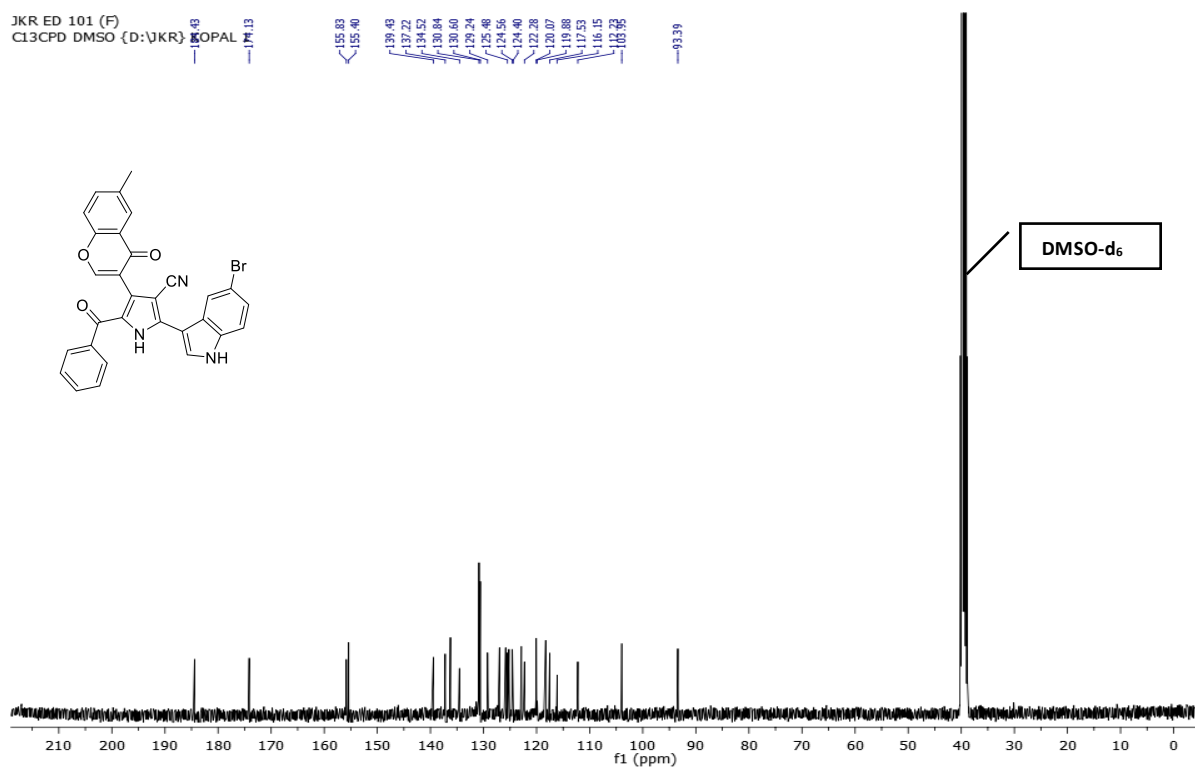

<sup>13</sup>C {<sup>1</sup>H} NMR spectrum of **4e** (100 MHz, DMSO-*d*<sub>6</sub>)



JKR ED 101 (F)  
 Cl3DEPT135 DMSO {D-}JKR} KOPAL 1

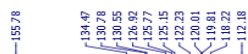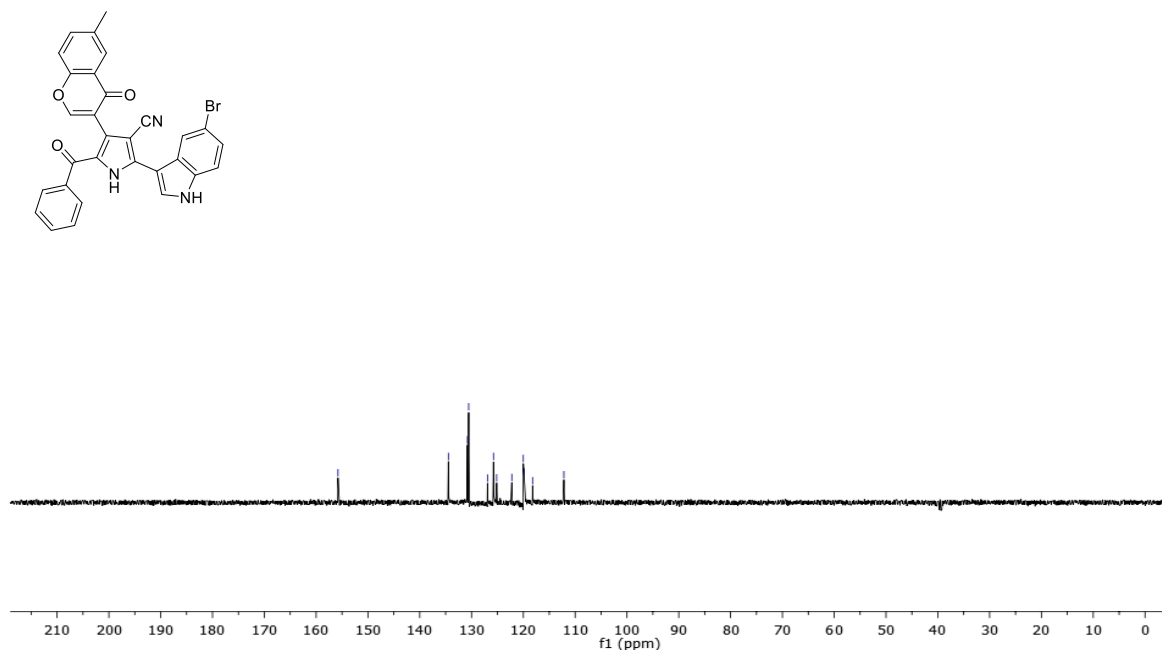

DEPT 135 NMR spectrum of **4e** (100 MHz, DMSO-*d*<sub>6</sub>)

| Sample Name   | JKR-ED-101F   | Position    | Instrument Name | Q-TOF         | User Name              | QTOF-PU/admin       |
|---------------|---------------|-------------|-----------------|---------------|------------------------|---------------------|
| Inj Vol       | -1            | InjPosition | SampleType      | Sample        | IRM Calibration Status | Success             |
| Data Filename | JKR-ED-101F.d | ACQ Method  | Comment         | ED-JKR-624.96 | Acquired Time          | 24-04-2018 16:13:10 |

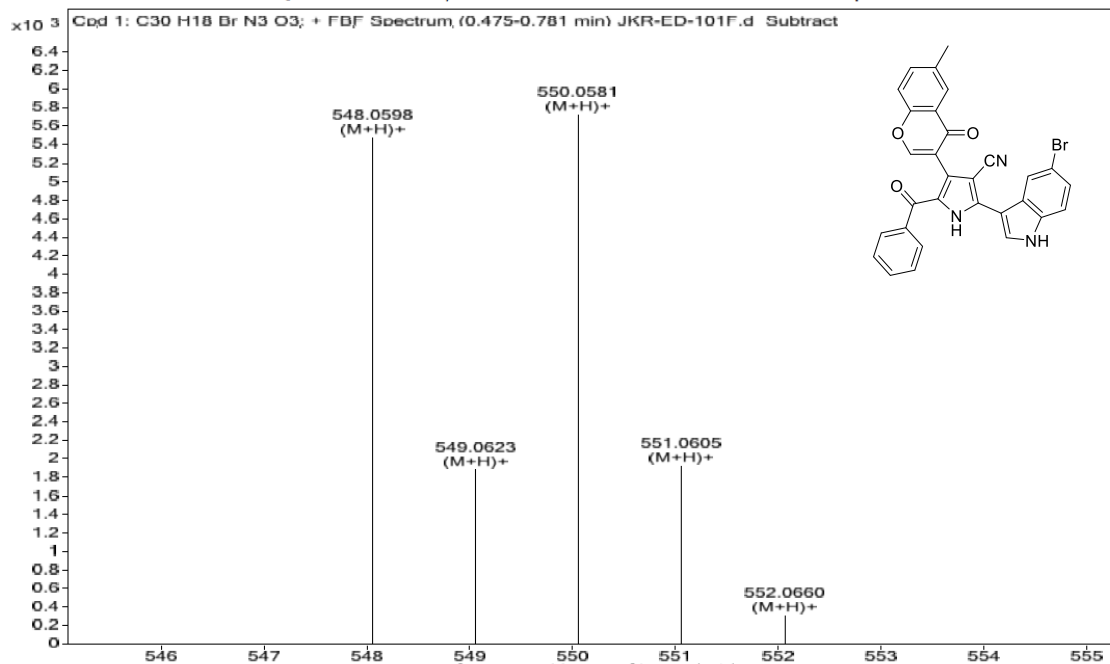

HRMS (ESI) spectrum of **4e**

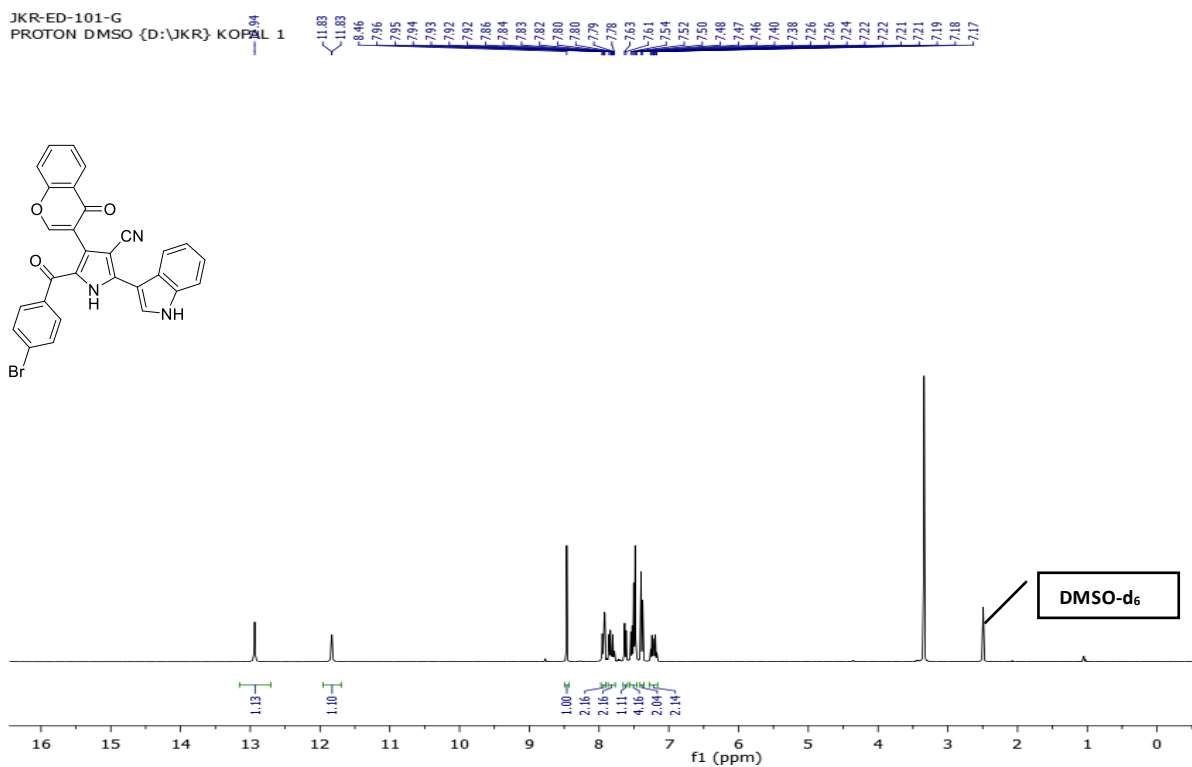

<sup>1</sup>H NMR spectrum of **4f** (400 MHz, DMSO-*d*<sub>6</sub>)

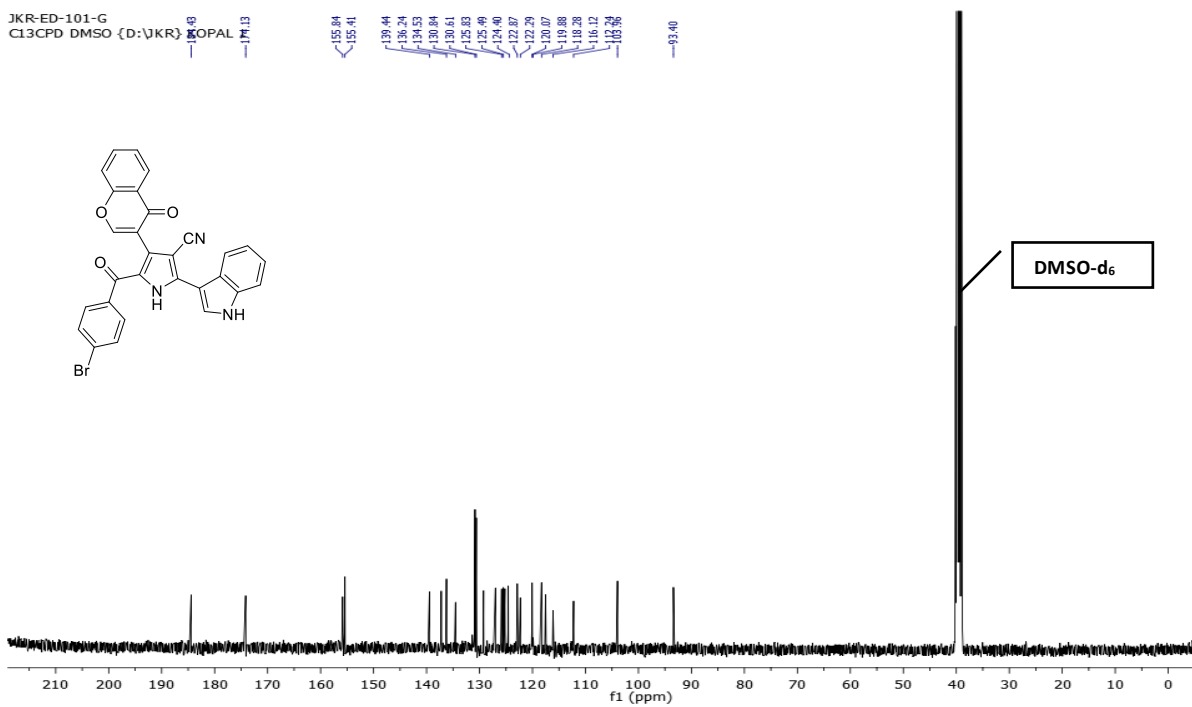

<sup>13</sup>C{<sup>1</sup>H} NMR spectrum of **4f** (100 MHz, DMSO-*d*<sub>6</sub>)

JKR-ED 101 (G)  
 Cl3DEPT135 DMSO {D:\JKR} KOPAL 1

155.68  
 135.41  
 131.76  
 128.62  
 128.27  
 127.75  
 124.80  
 124.42  
 122.14  
 117.99  
 114.20

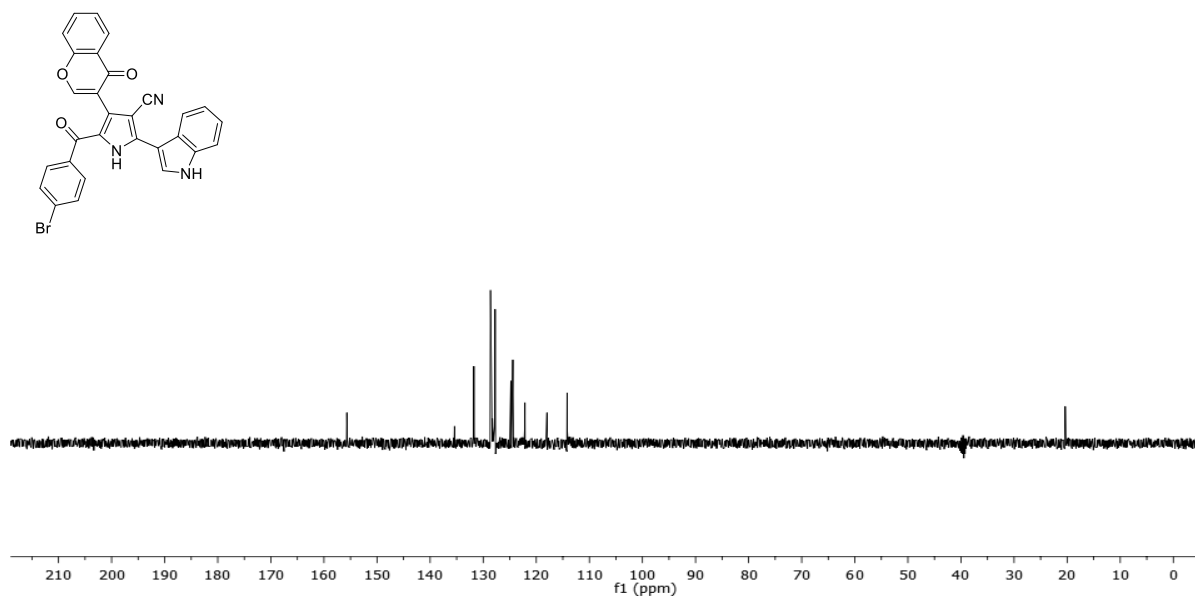

DEPT 135 NMR spectrum of **4f** (100 MHz, DMSO-*d*<sub>6</sub>)

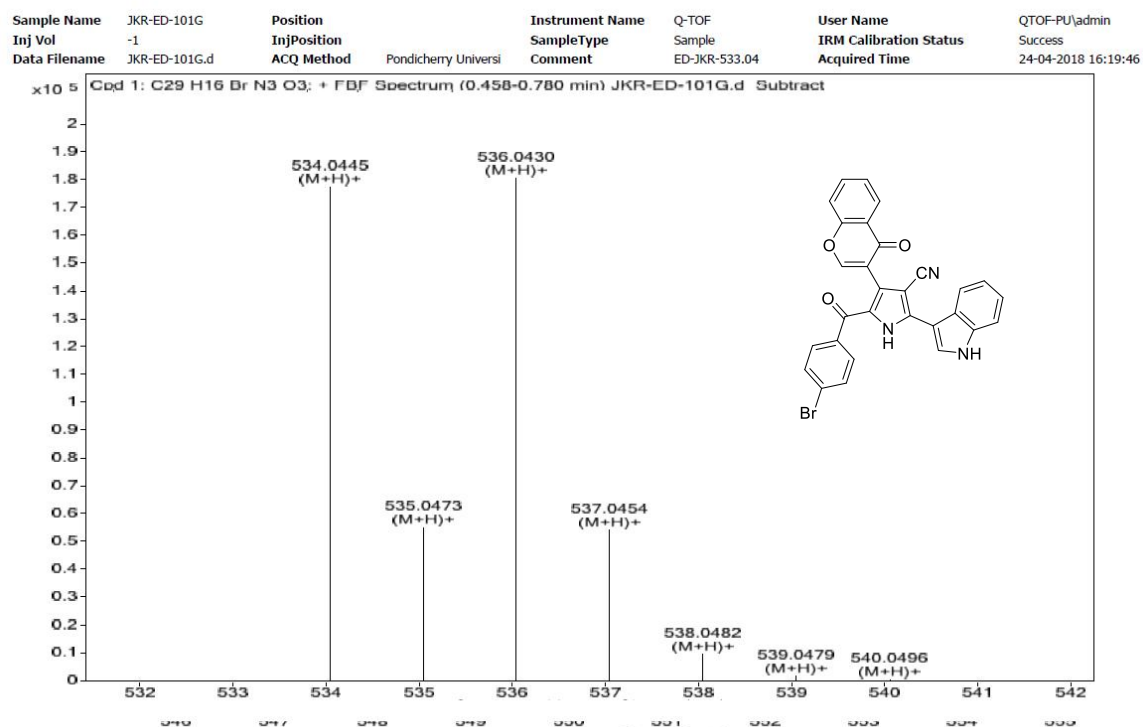

HRMS (ESI) spectrum of **4f**

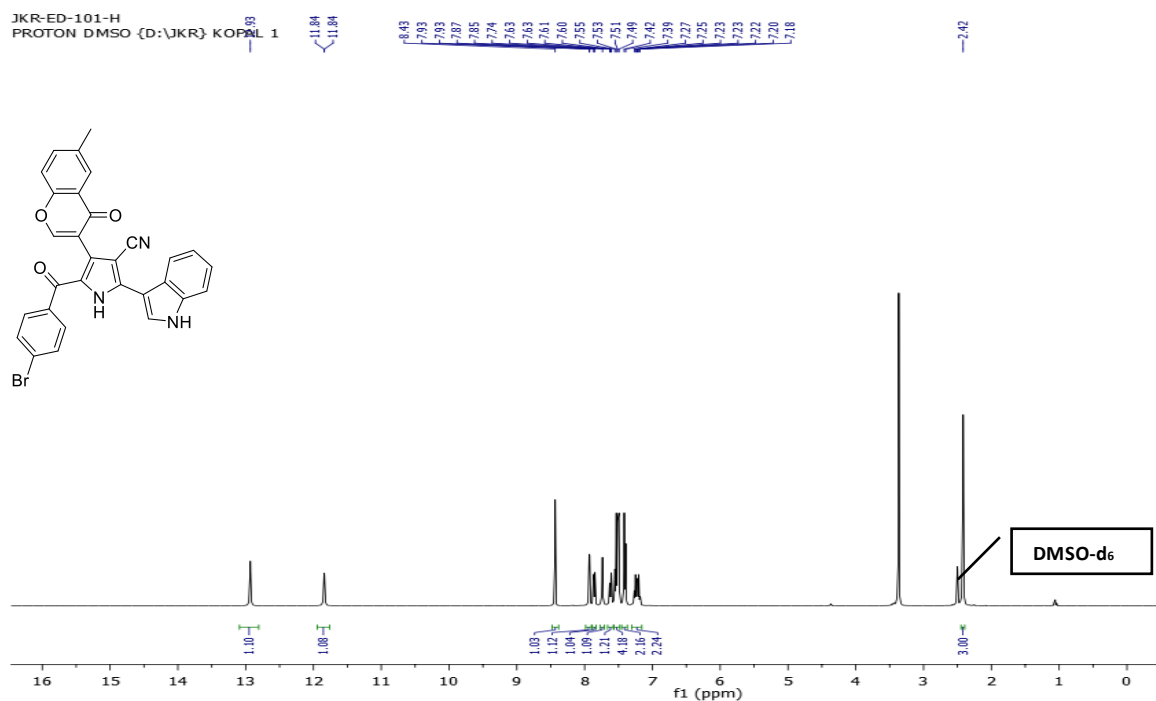

<sup>1</sup>H NMR spectrum of **4g** (400 MHz, DMSO-*d*<sub>6</sub>)

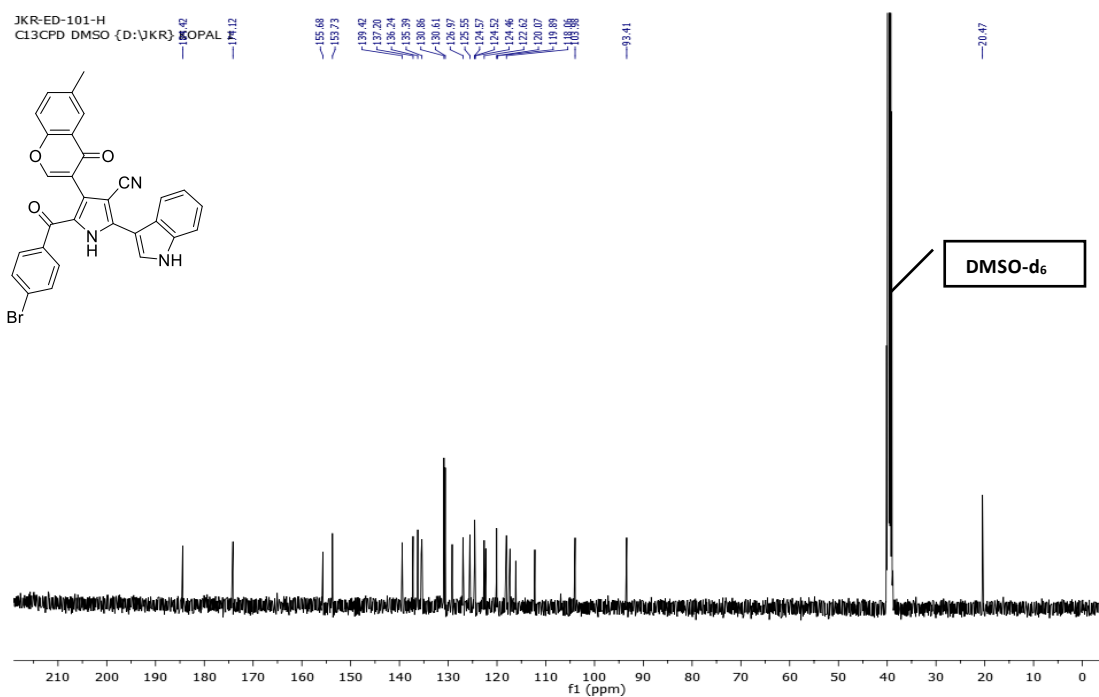

<sup>13</sup>C{<sup>1</sup>H} NMR spectrum of **4g** (100 MHz, DMSO-*d*<sub>6</sub>)

JKR-ED-101-H  
 CL3DEPT135 DMSO {D-}JKR} KOPAL 1

155.61

135.47  
 130.80  
 130.54  
 126.90  
 124.39  
 122.23  
 120.00  
 119.81  
 118.00  
 112.17

20.40

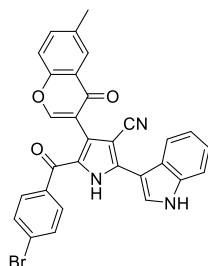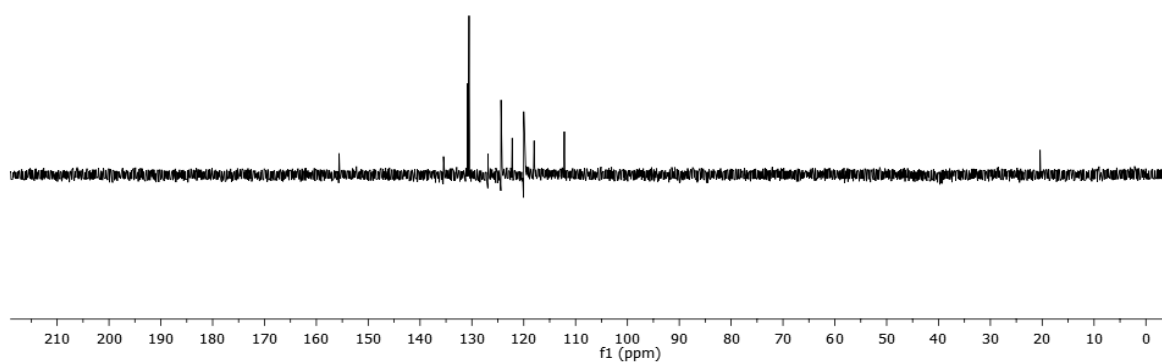

DEPT 135 NMR spectrum of **4g** (100 MHz, DMSO-*d*<sub>6</sub>)

| Sample Name   | JKR-ED-101H   | Position    | Instrument Name | Q-TOF         | User Name              | QTOF-PU\admin       |
|---------------|---------------|-------------|-----------------|---------------|------------------------|---------------------|
| Inj Vol       | -1            | InjPosition | SampleType      | Sample        | IRM Calibration Status | Success             |
| Data Filename | JKR-ED-101H.d | ACQ Method  | Comment         | JKR-ED-547.05 | Acquired Time          | 25-04-2018 12:28:13 |

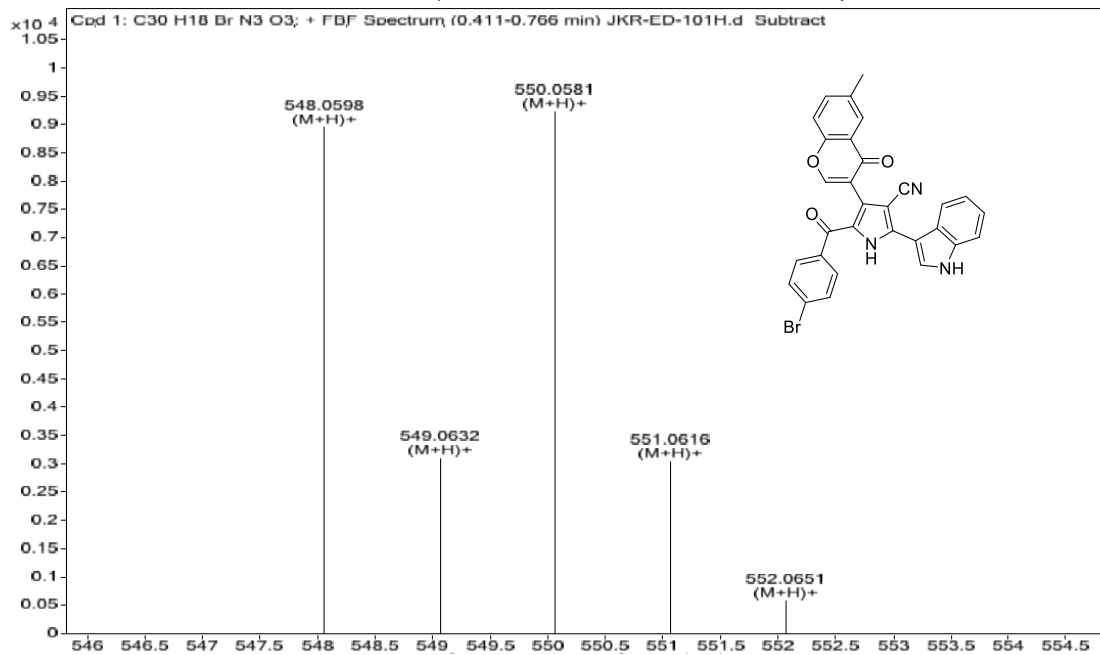

HRMS (ESI) spectrum of **4g**

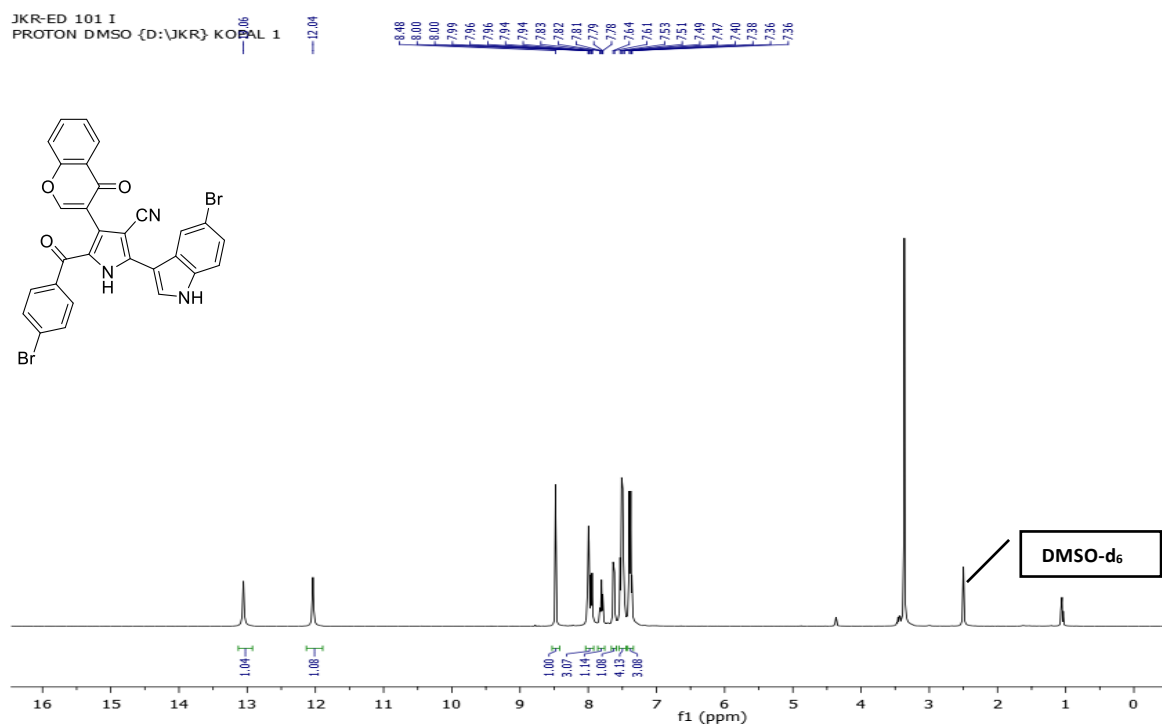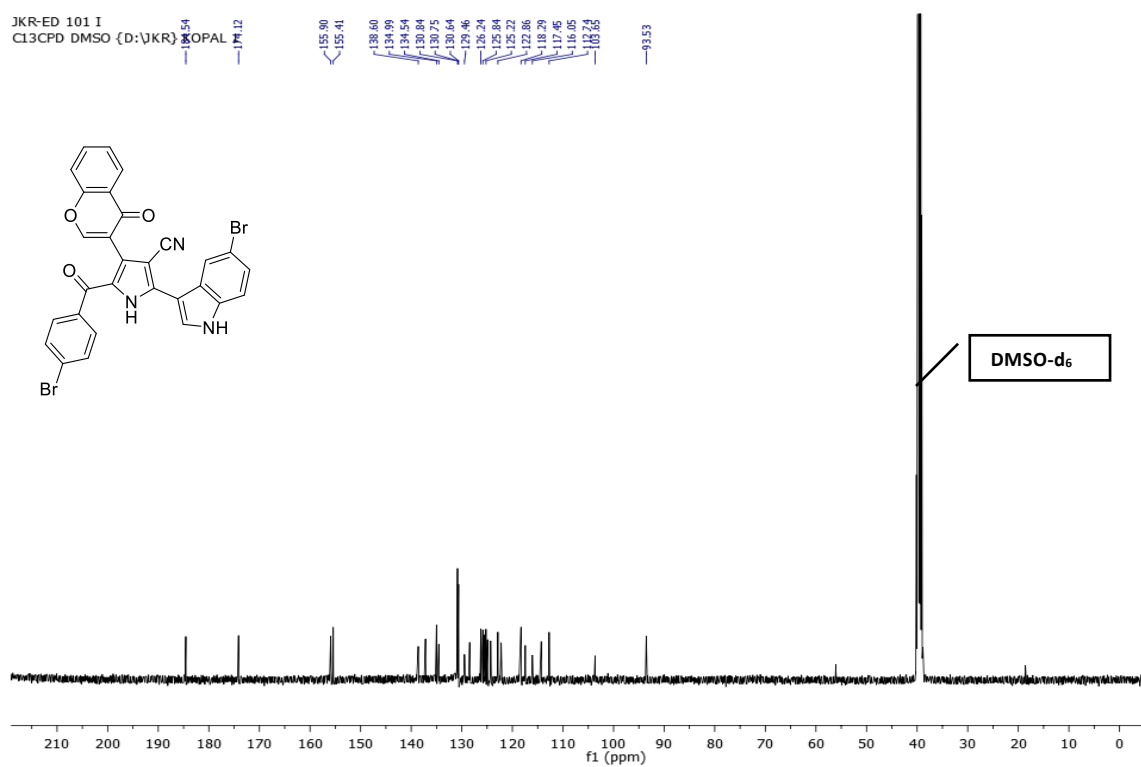

JKR-ED 101 I  
 CL3DEPT135 DMSO {D-}JKR} KOPAL 1

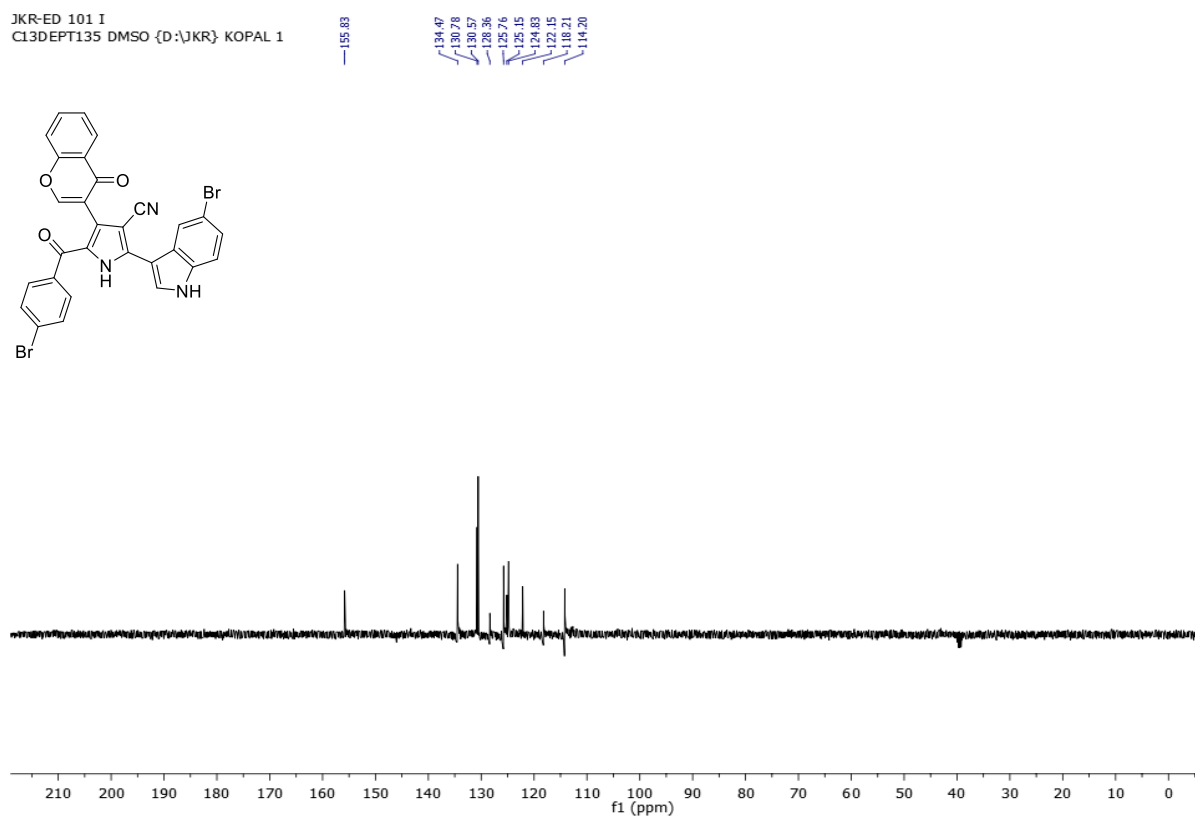

DEPT 135 NMR spectrum of **4h** (100 MHz, DMSO-*d*<sub>6</sub>)

| Sample Name   | Position      | InjPosition | Instrument Name      | Q-TOF   | User Name              | QTOF-PU/admin |                     |
|---------------|---------------|-------------|----------------------|---------|------------------------|---------------|---------------------|
| JKR-ED-101I   | -1            |             | Sample               | Sample  | IRM Calibration Status | Success       |                     |
| Data Filename | JKR-ED-101I.d | ACQ Method  | Pondicherry Universi | Comment | JKR-ED-610.95          | Acquired Time | 25-04-2018 12:24:39 |

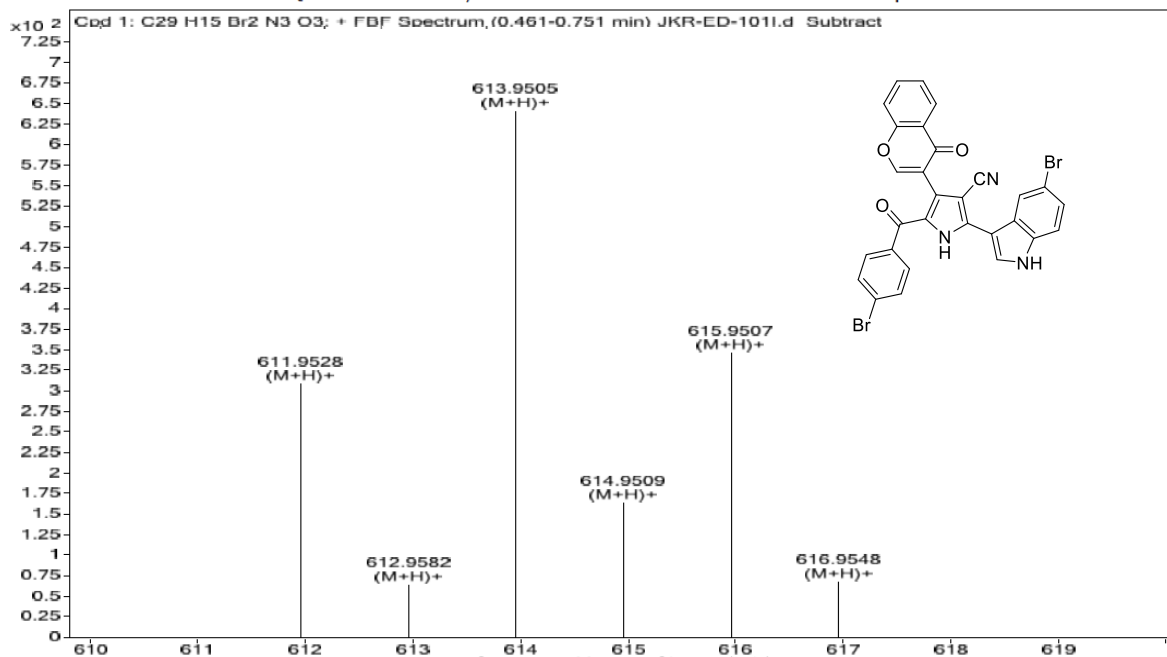

HRMS (ESI) spectrum of **4h**

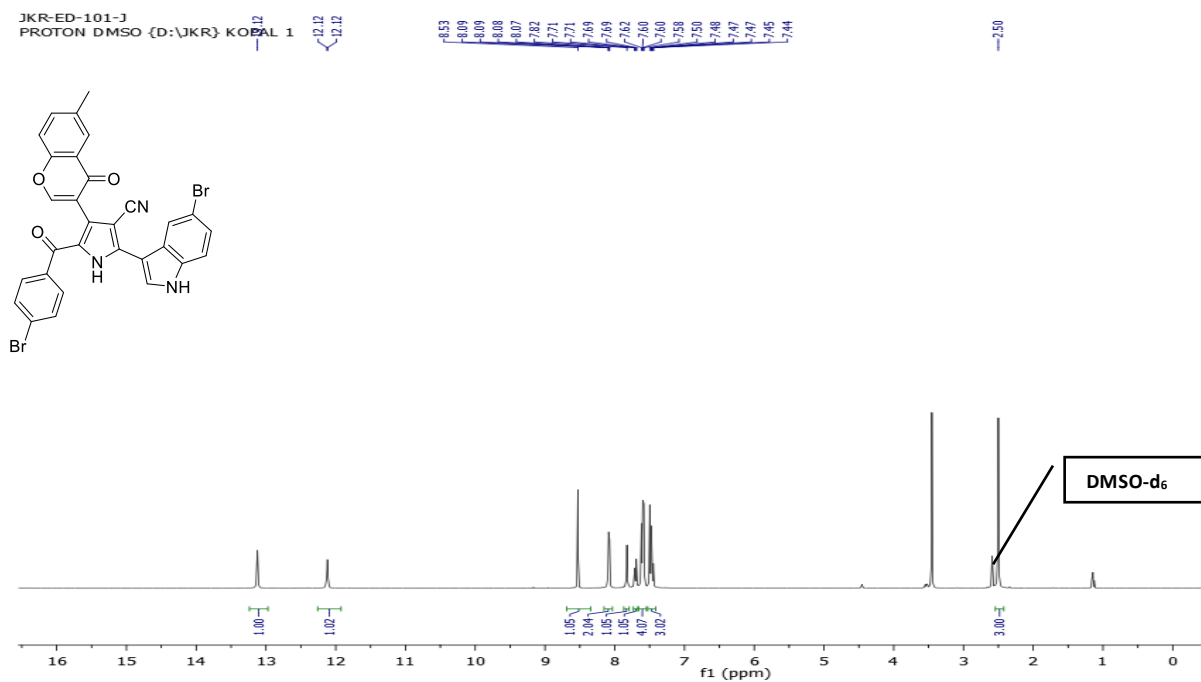

<sup>1</sup>H NMR spectrum of **4i** (400 MHz, DMSO-*d*<sub>6</sub>)

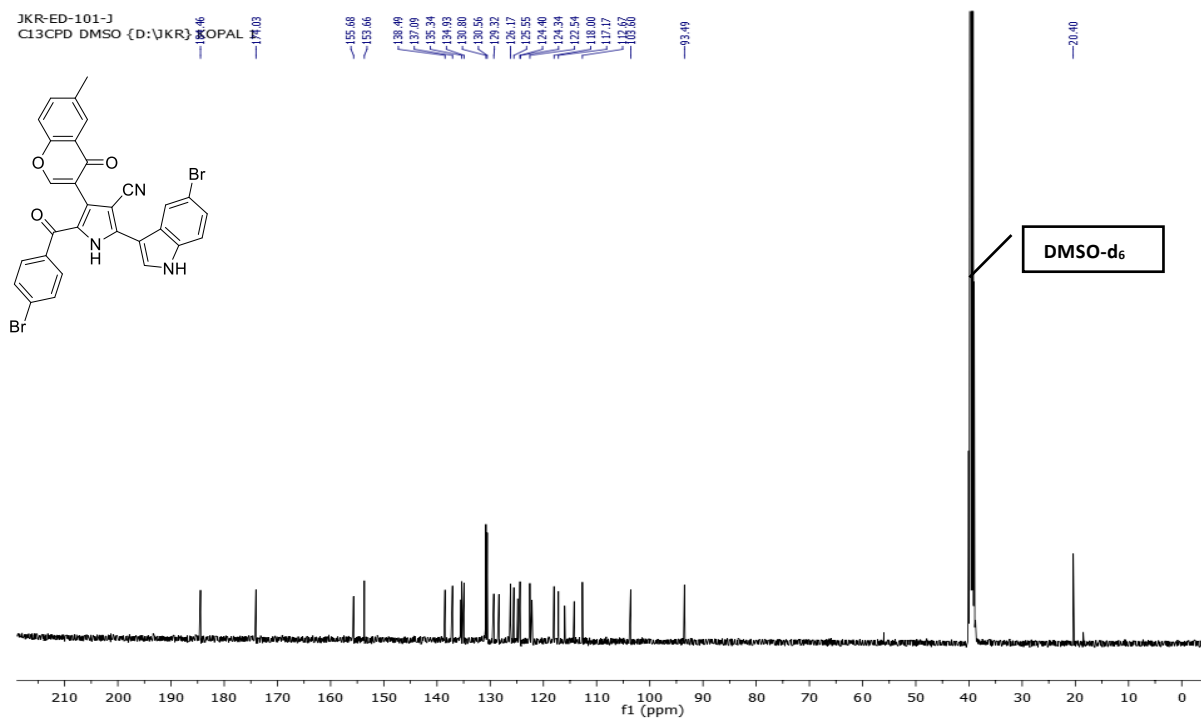

<sup>13</sup>C {<sup>1</sup>H} NMR spectrum of **4i** (100 MHz, DMSO-*d*<sub>6</sub>)



JKR-ED-101-J  
Cl3DEPT135 DMSO {D:\JKR} KOPAL 1

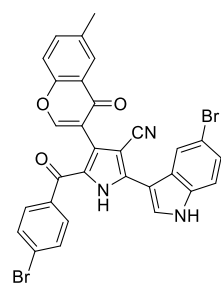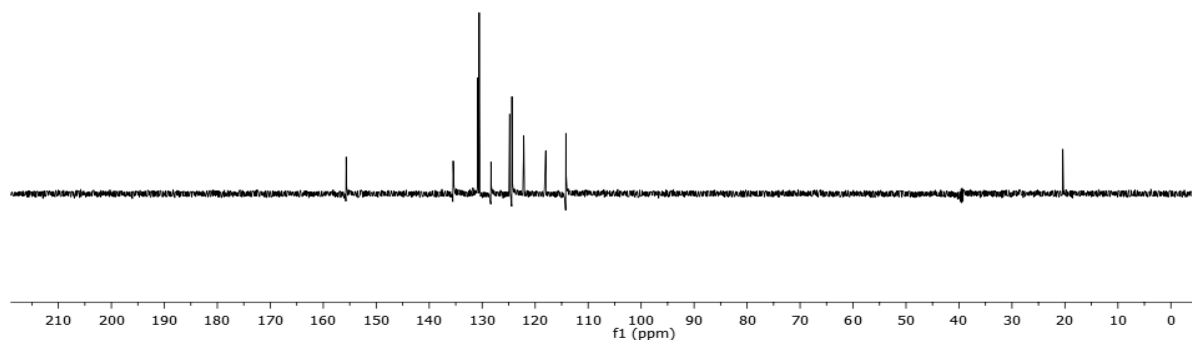

DEPT 135 NMR spectrum of **4i** (100 MHz, DMSO- $d_6$ )

| Sample Name   | JKR-ED-101J   | Position    |                      | Instrument Name | Q-TOF         | User Name              | QTOF-PU\admin       |
|---------------|---------------|-------------|----------------------|-----------------|---------------|------------------------|---------------------|
| Inj Vol       | -1            | InjPosition |                      | SampleType      | Sample        | IRM Calibration Status | Success             |
| Data Filename | JKR-ED-101J.d | ACQ Method  | Pondicherry Universi | Comment         | ED-JKR-624.96 | Acquired Time          | 26-04-2018 12:46:44 |

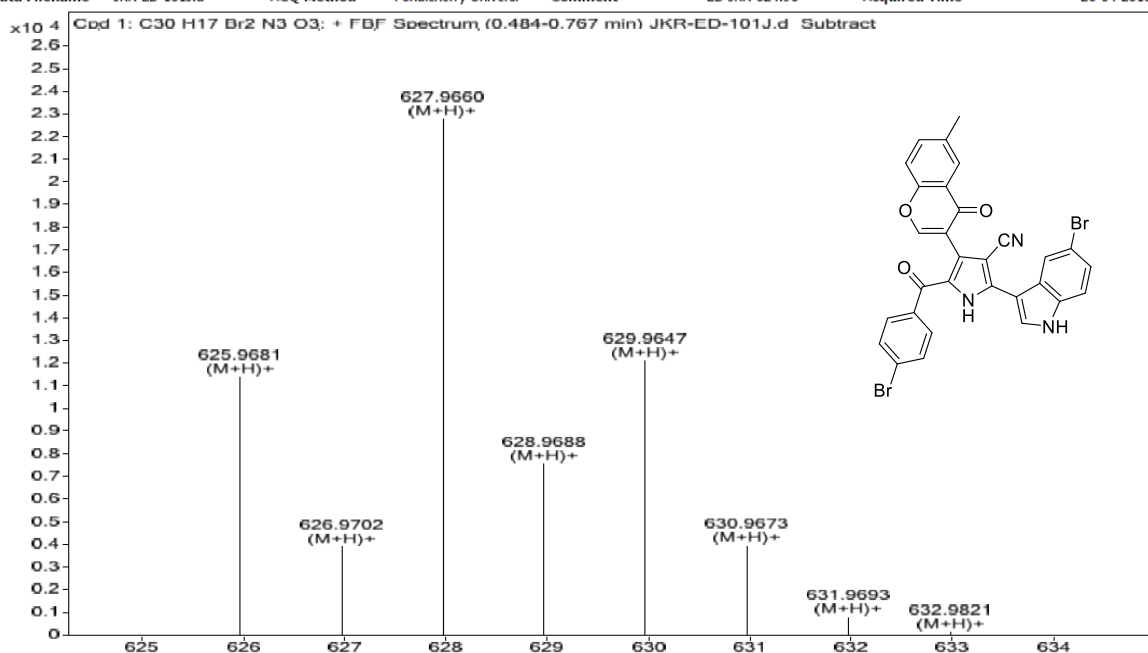

HRMS (ESI) spectrum of **4i**

JKR-ED-101K  
PROTON DMSO (D:\JKR) KOPAL 1

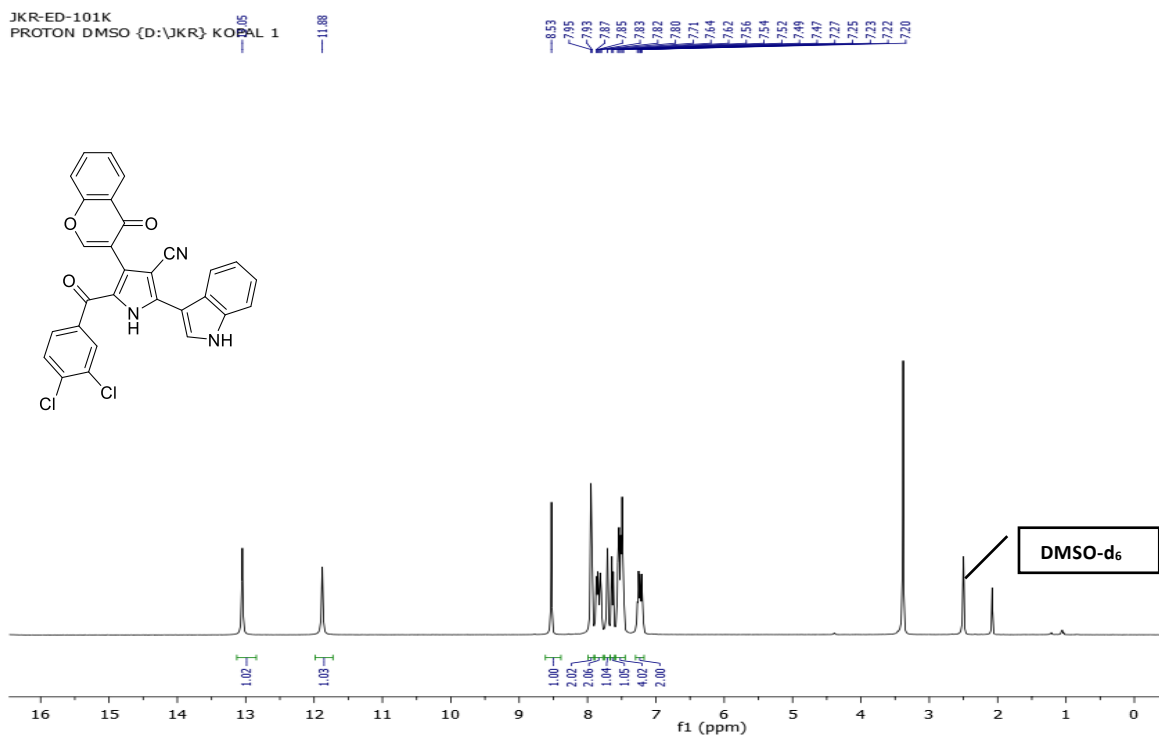

<sup>1</sup>H NMR spectrum of **4j** (400 MHz, DMSO-*d*<sub>6</sub>)

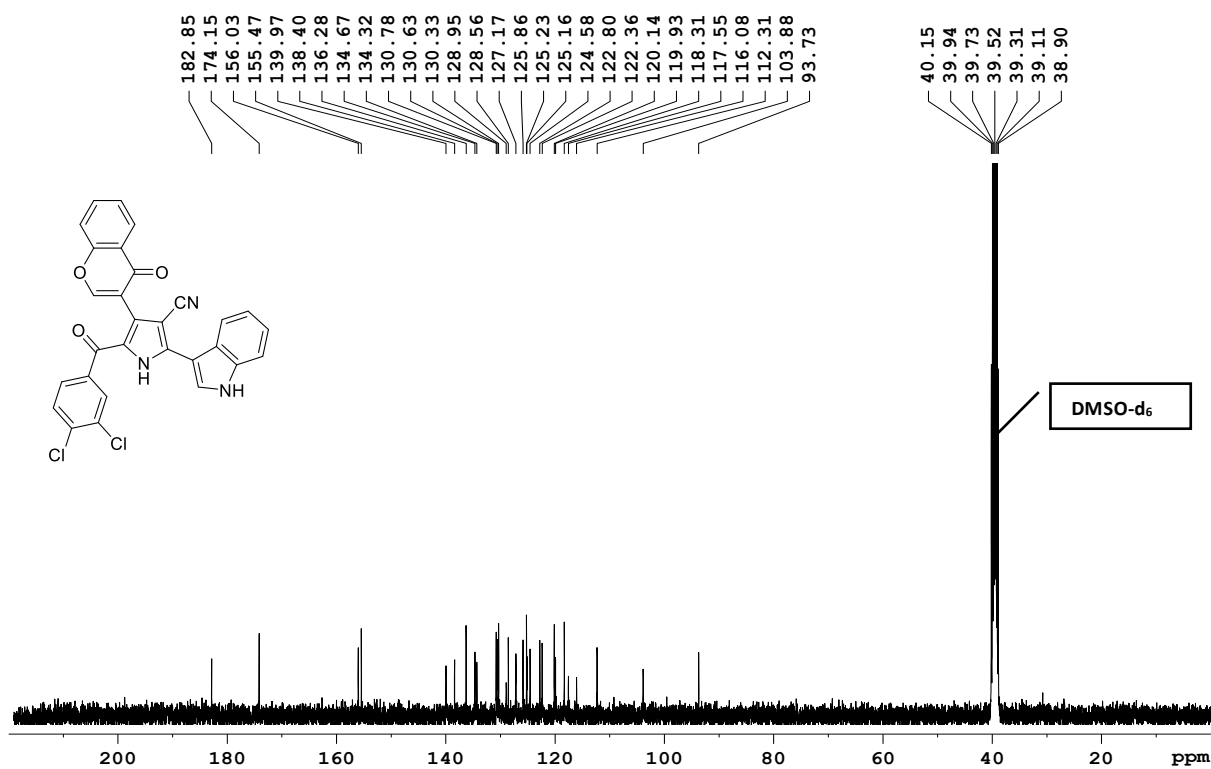

<sup>13</sup>C{<sup>1</sup>H} NMR spectrum of **4j** (100 MHz, DMSO-*d*<sub>6</sub>)

JKR-ED-101K  
C13DEPT135 DMSO {D:\JKR} KOPAL 1

155.92

134.57  
130.54  
130.23  
128.46  
127.06  
125.76  
125.14  
122.27  
120.04  
119.83  
118.21  
112.22

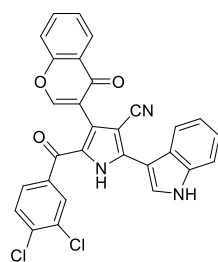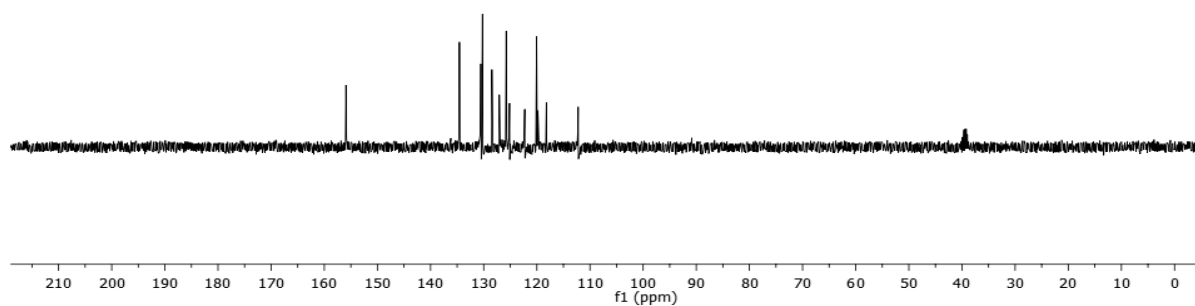

DEPT 135 NMR spectrum of **4j** (100 MHz, DMSO- $d_6$ )

| Sample Name   | JKR-ED-101K   | Position    |                      | Instrument Name | Q-TOF         | User Name              | QTOF-PU\admin       |
|---------------|---------------|-------------|----------------------|-----------------|---------------|------------------------|---------------------|
| Inj Vol       | -1            | InjPosition |                      | SampleType      | Sample        | IRM Calibration Status | Success             |
| Data Filename | JKR-ED-101K.d | ACQ Method  | Pondicherry Universi | Comment         | ED-JKR-523.05 | Acquired Time          | 26-04-2018 12:43:00 |

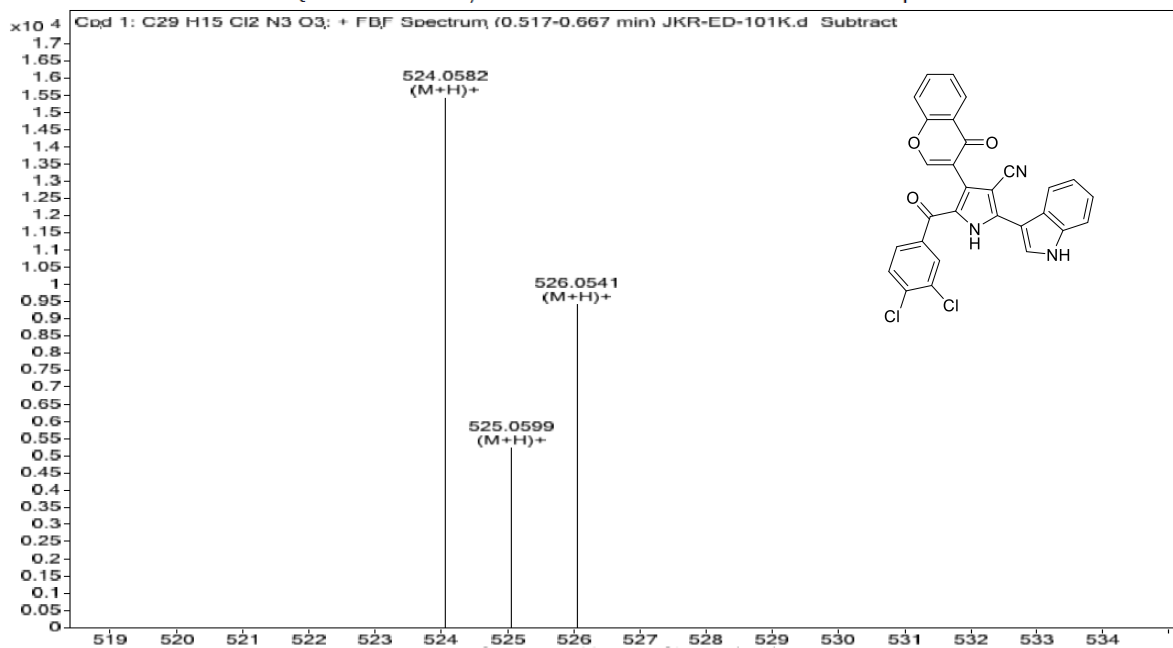

HRMS (ESI) spectrum of **4j**

JKR-ED-101L  
PROTON DMSO {D:\JKR\KOPAL 1

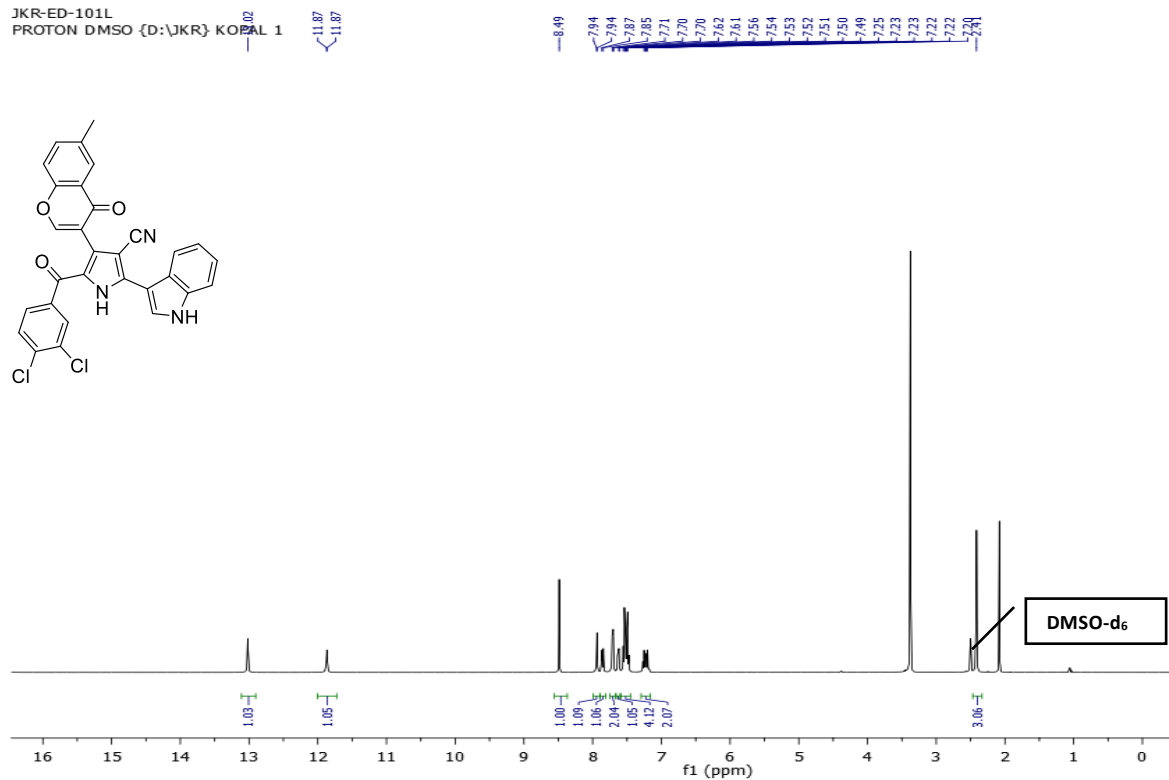

<sup>1</sup>H NMR spectrum of **4k** (400 MHz, DMSO-*d*<sub>6</sub>)

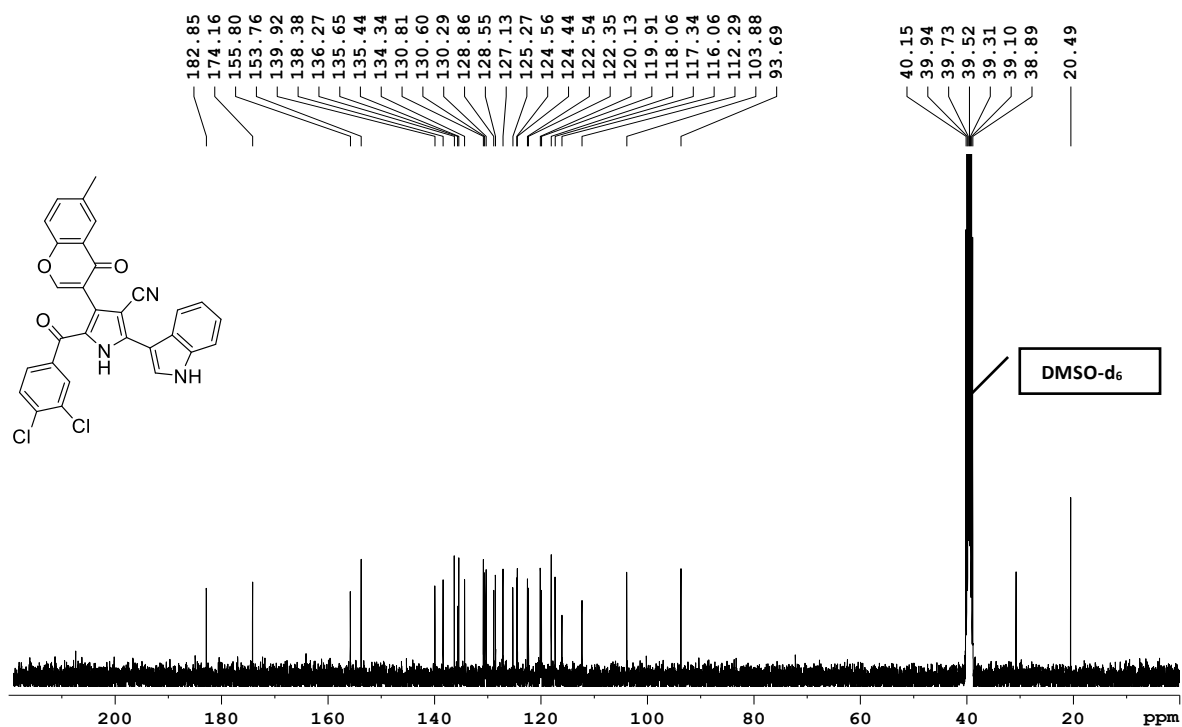

<sup>13</sup>C{<sup>1</sup>H} NMR spectrum of **4k** (100 MHz, DMSO-*d*<sub>6</sub>)

JKR-ED-101L  
C13DEPT135 DMSO {D:\JKR} KOPAL 1

155.71

135.56  
130.52  
130.21  
128.46  
127.04  
124.36  
122.26  
120.03  
119.82  
117.88  
112.21

20.40

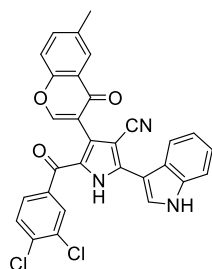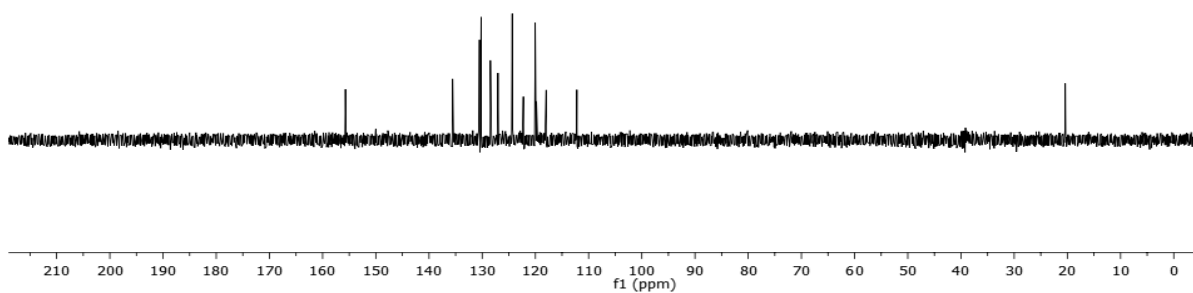

DEPT 135 NMR spectrum of **4k** (100 MHz, DMSO-*d*<sub>6</sub>)

| Sample Name   | JKR-ED-101L    | Position    |                      | Instrument Name | Q-TOF         | User Name              | QTOF-PU\admin       |
|---------------|----------------|-------------|----------------------|-----------------|---------------|------------------------|---------------------|
| Inj Vol       | -1             | InjPosition |                      | SampleType      | Sample        | IRM Calibration Status | Success             |
| Data Filename | JKR-ED-101Lx.d | ACQ Method  | Pondicherry Universi | Comment         | ED-JKR-537.06 | Acquired Time          | 02-05-2018 14:52:52 |

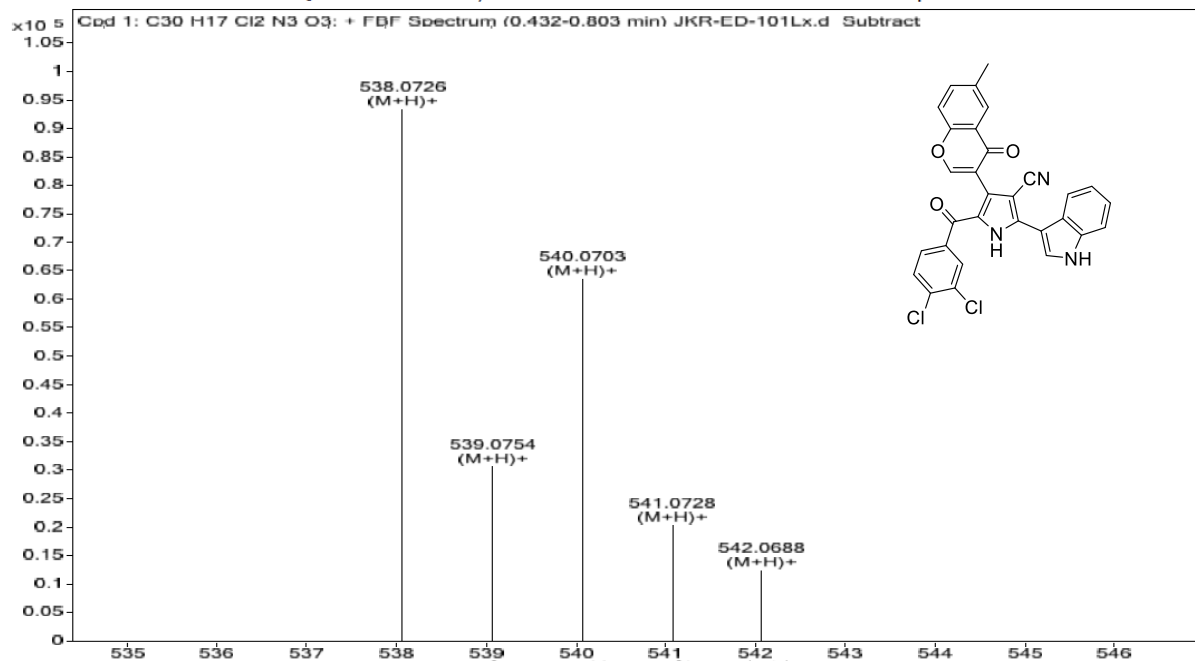

HRMS (ESI) spectrum of **4k**

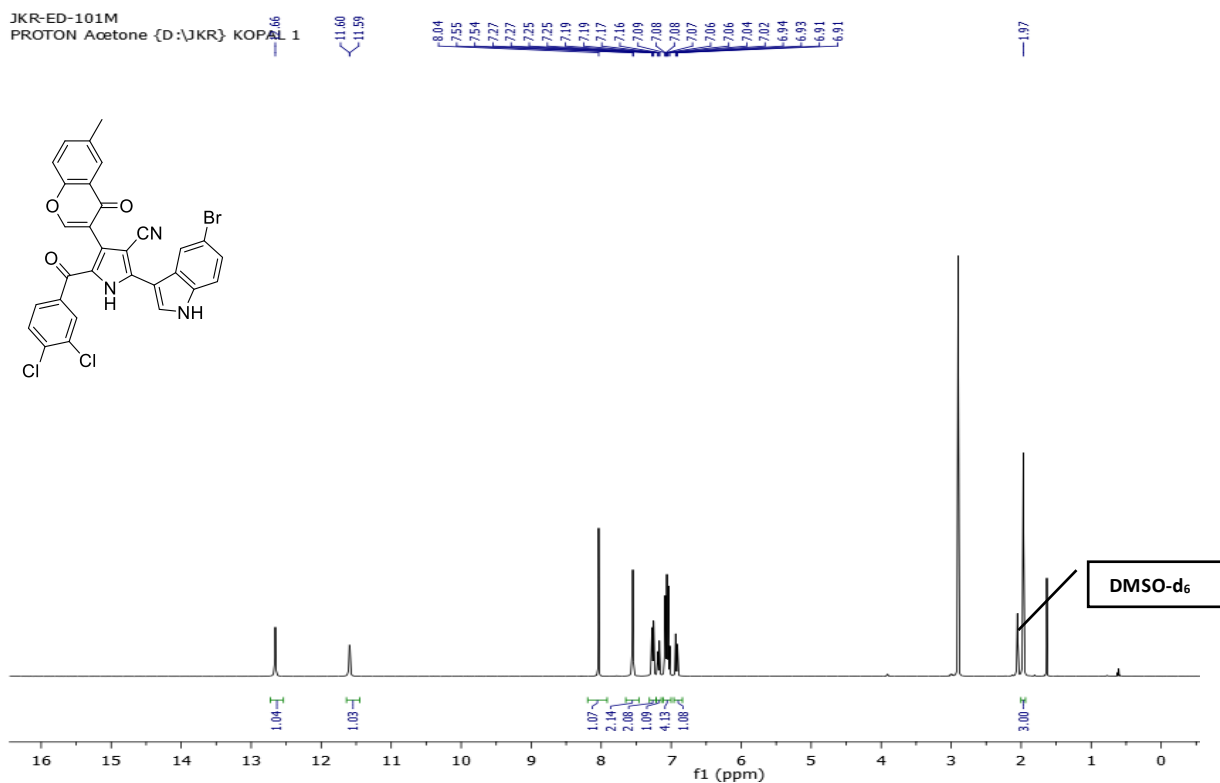

$^1\text{H}$  NMR spectrum of **4I** (400 MHz, DMSO- $d_6$ )

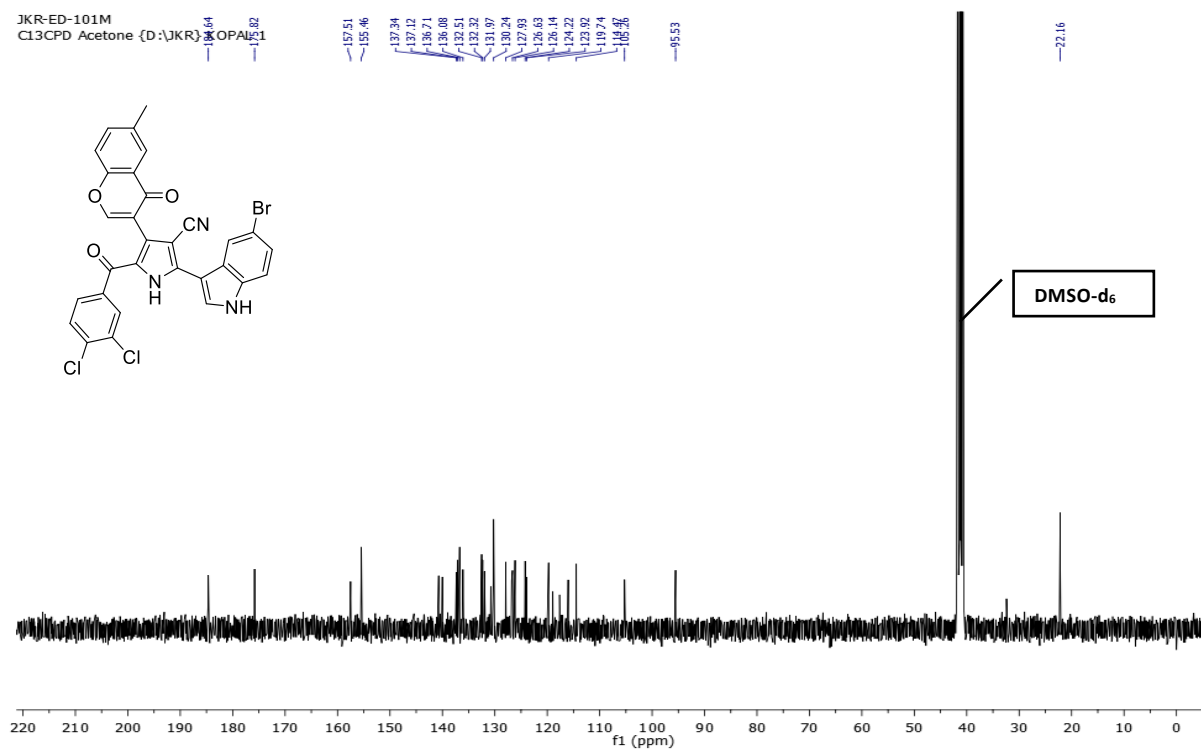

$^{13}\text{C}\{^1\text{H}\}$  NMR spectrum of **4I** (100 MHz, DMSO- $d_6$ )

JKR-ED-101M  
Cl3DEPT135 Acetone {D:\JKR} KOPAL 1

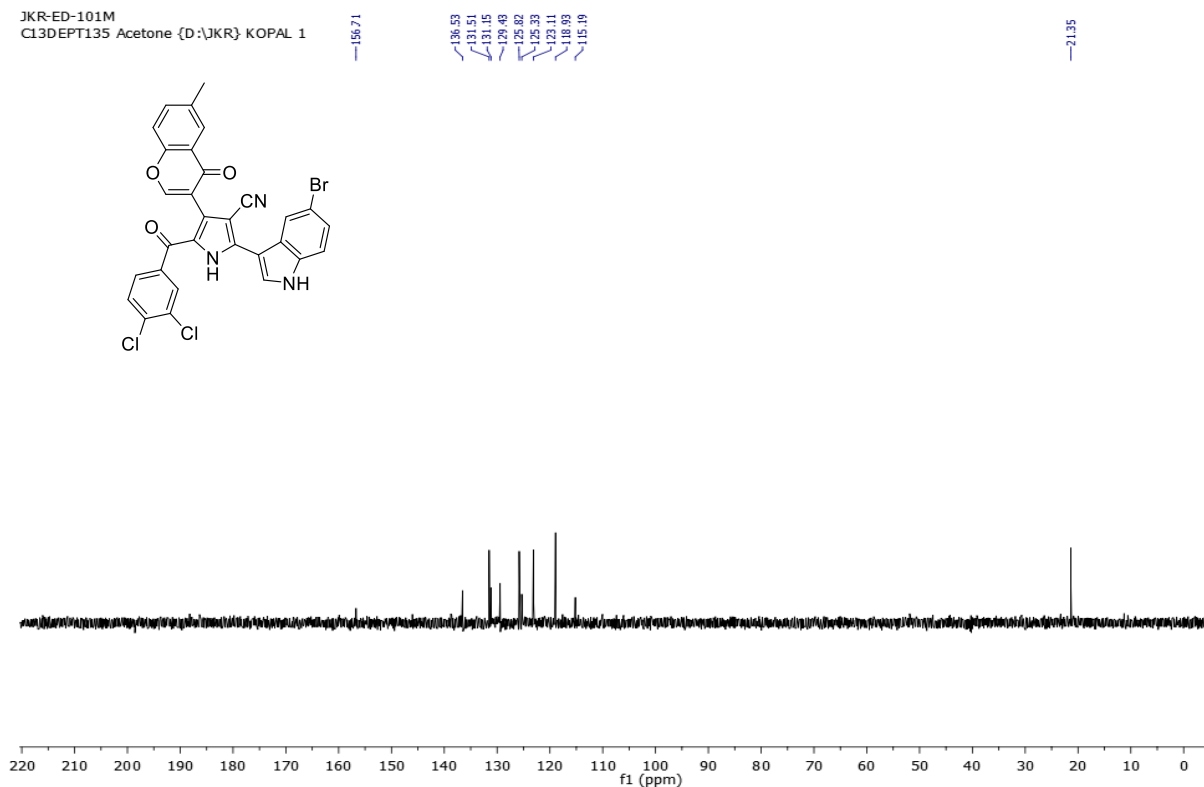

DEPT 135 NMR spectrum of **4l** (100 MHz, DMSO- $d_6$ )

| Sample Name   | JKR-ED-101M   | Position    | Instrument Name | Q-TOF         | User Name              | QTOF-PU\admin       |
|---------------|---------------|-------------|-----------------|---------------|------------------------|---------------------|
| Inj Vol       | -1            | InjPosition | SampleType      | Sample        | IRM Calibration Status | Success             |
| Data Filename | JKR-ED-101M.d | ACQ Method  | Comment         | ED-JKR-614.98 | Acquired Time          | 04-05-2018 11:54:36 |

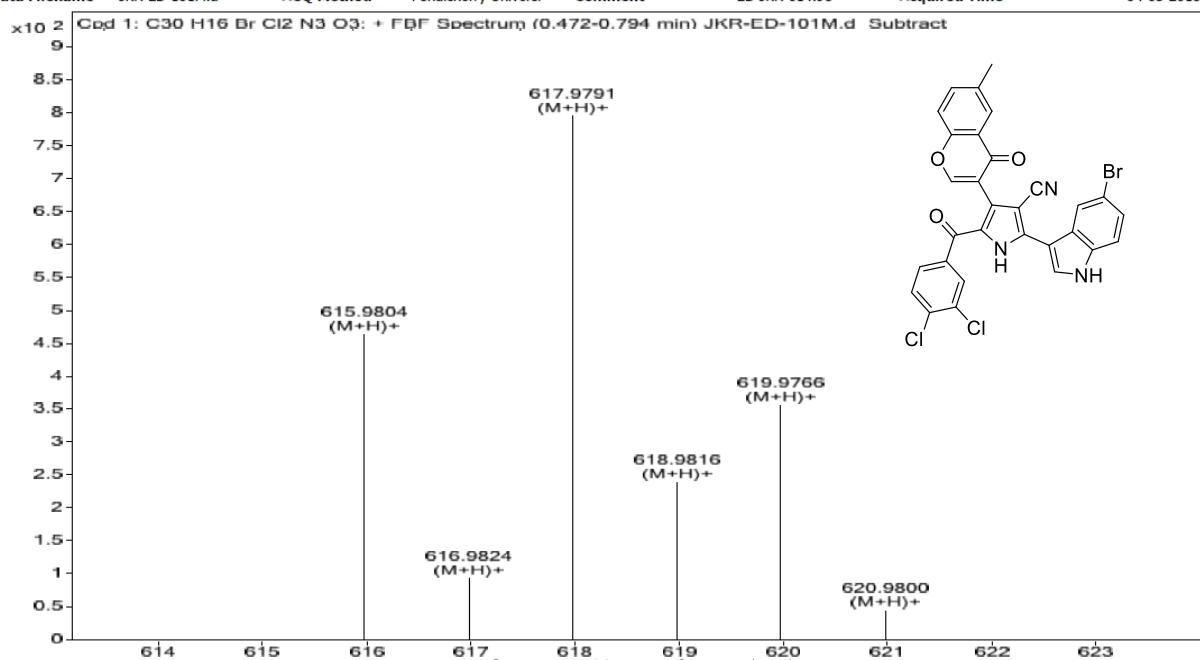

HRMS (ESI) spectrum of **4l**

JKR-ED-101N  
PROTON DMSO {D:\JKR} KOPAL 1

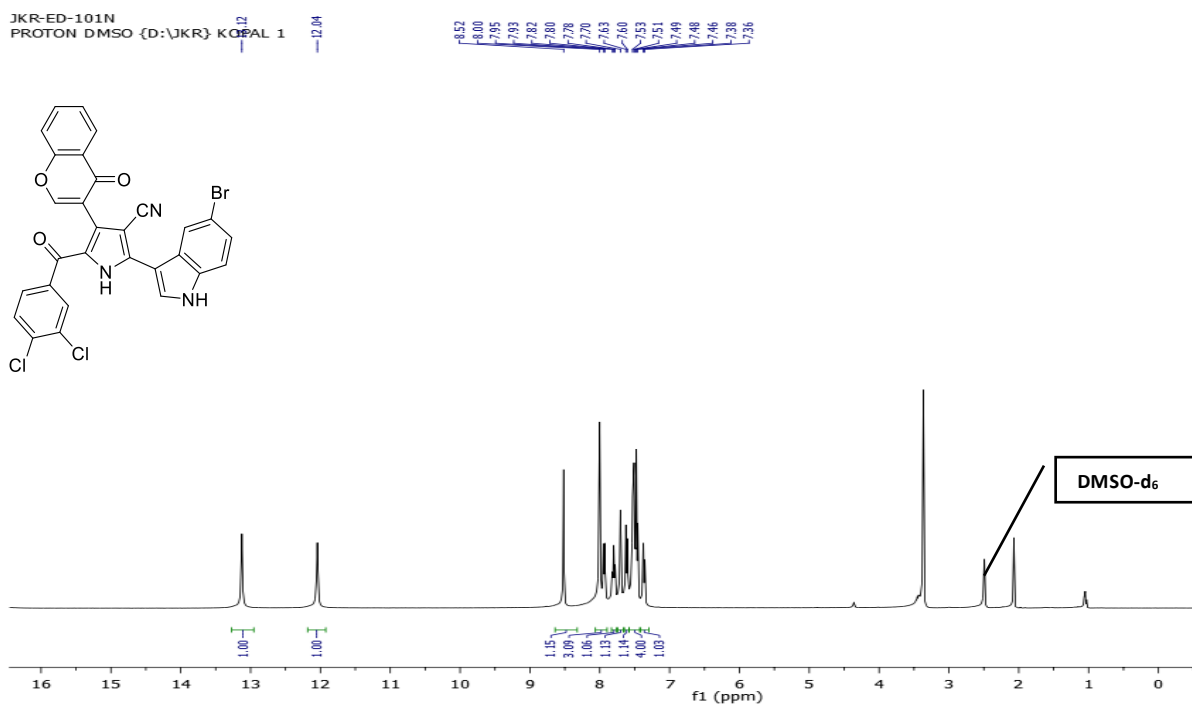

<sup>1</sup>H NMR spectrum of **4m** (400 MHz, DMSO-*d*<sub>6</sub>)

JKR-ED-101N  
C13CPD DMSO {D:\JKR} KOPAL 1

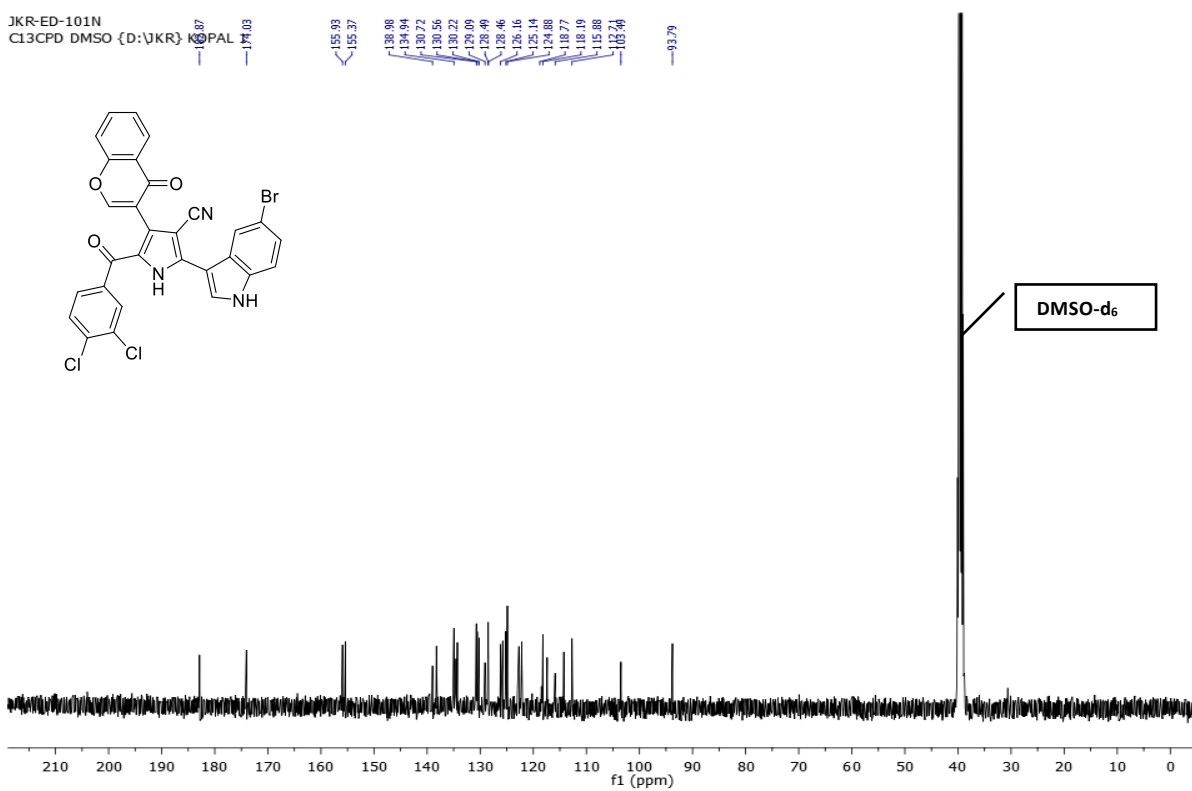

<sup>13</sup>C {<sup>1</sup>H} NMR spectrum of **4m** (100 MHz, DMSO-*d*<sub>6</sub>)



JKR-ED-101N  
 CL3DEPT135 DMSO {D:\JKR} KOPAL 1

155.93 134.54 130.56 130.22 128.46 125.75 125.15 124.87 122.17 118.18 114.23

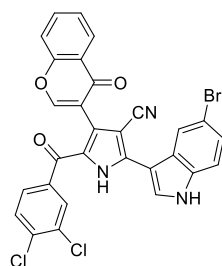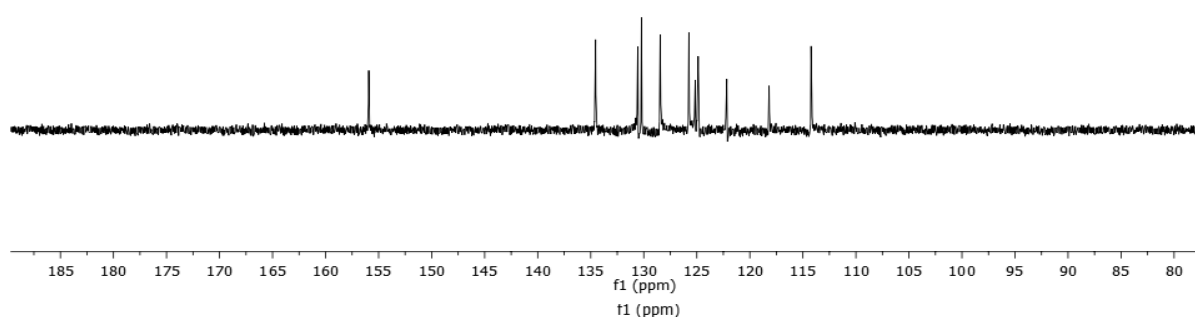

DEPT 135 NMR spectrum of **4m** (100 MHz, DMSO-*d*<sub>6</sub>)

| Sample Name   | JKR-ED-101N   | Position    | Instrument Name | Q-TOF         | User Name              | QTOF-PU\admin       |
|---------------|---------------|-------------|-----------------|---------------|------------------------|---------------------|
| Inj Vol       | -1            | InjPosition | SampleType      | Sample        | IRM Calibration Status | Success             |
| Data Filename | JKR-ED-101N.d | ACQ Method  | Comment         | ED-JKR-600.96 | Acquired Time          | 02-05-2018 14:56:27 |

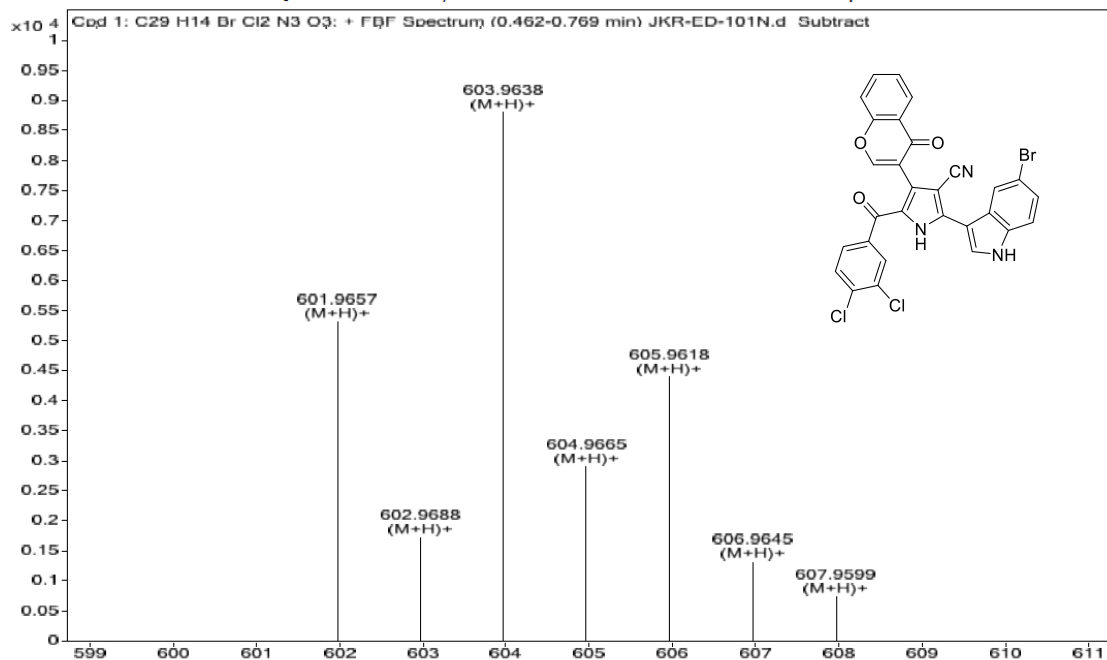

HRMS (ESI) spectrum of **4m**

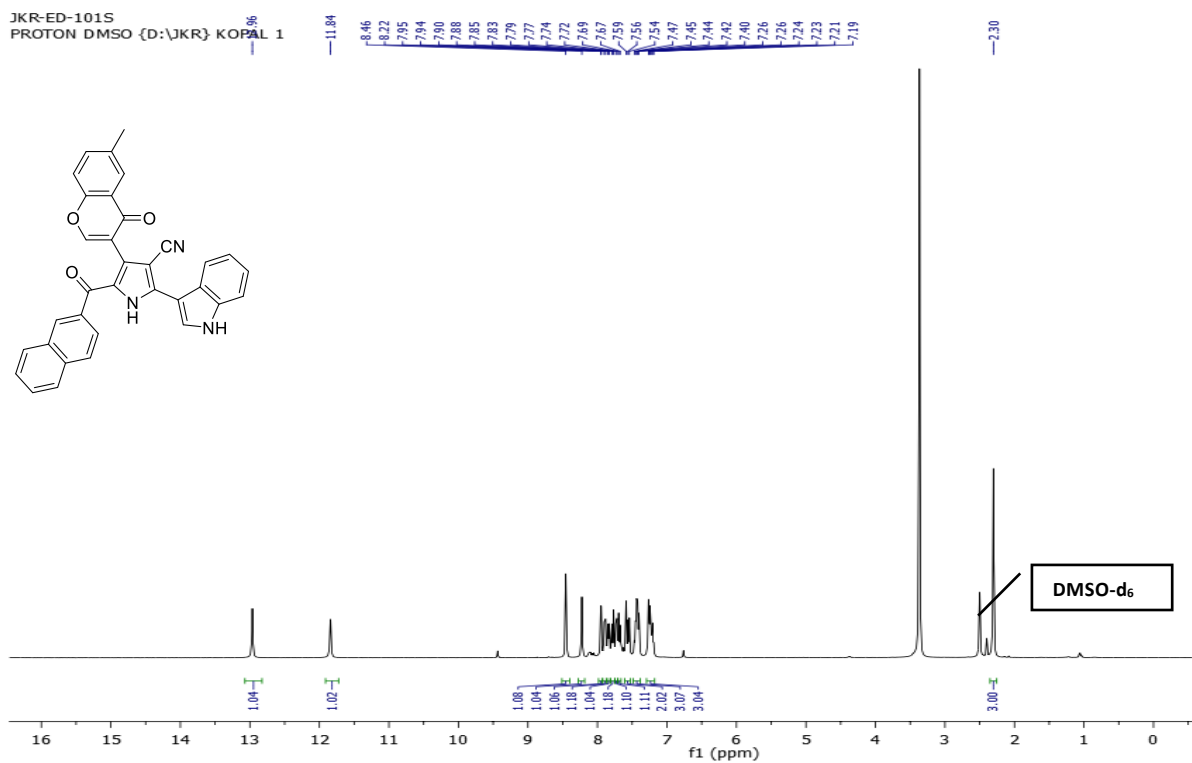

<sup>1</sup>H NMR spectrum of **4n** (400 MHz, DMSO-*d*<sub>6</sub>)

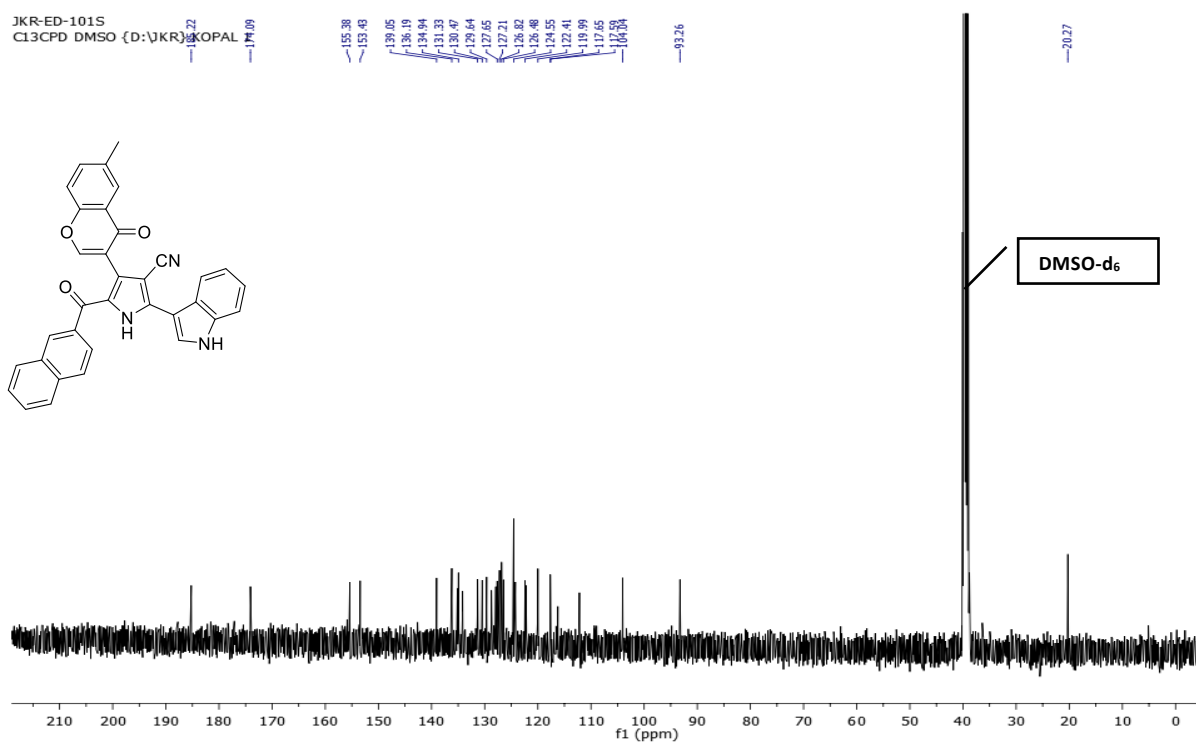

<sup>13</sup>C{<sup>1</sup>H} NMR spectrum of **4n** (100 MHz, DMSO-*d*<sub>6</sub>)

JKR-ED-101S  
Cl3DEPT135 DMSO {D-JKR} KOPAL 1

135.15  
130.47  
128.72  
127.92  
127.66  
127.21  
126.81  
126.48  
124.55  
124.21  
122.22  
119.88  
119.83  
117.65  
112.18

20.27

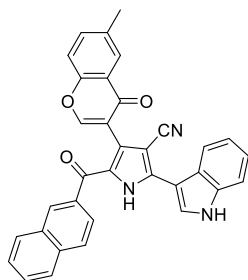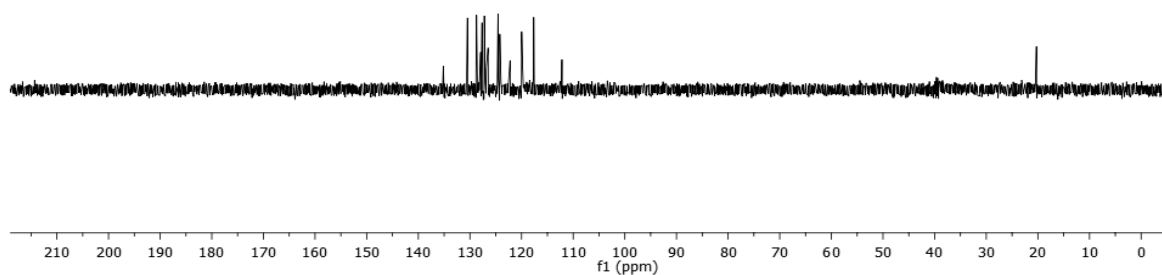

DEPT 135 NMR spectrum of **4n** (100 MHz, DMSO-*d*<sub>6</sub>)

| Sample Name   | JKR-ED-101S   | Position    |                      | Instrument Name | Q-TOF         | User Name              | QTOF-PU/admin       |
|---------------|---------------|-------------|----------------------|-----------------|---------------|------------------------|---------------------|
| Inj Vol       | -1            | InjPosition |                      | SampleType      | Sample        | IRM Calibration Status | Success             |
| Data Filename | JKR-ED-101S.d | ACQ Method  | Pondicherry Universi | Comment         | ED-JKR-519.16 | Acquired Time          | 04-05-2018 11:50:03 |

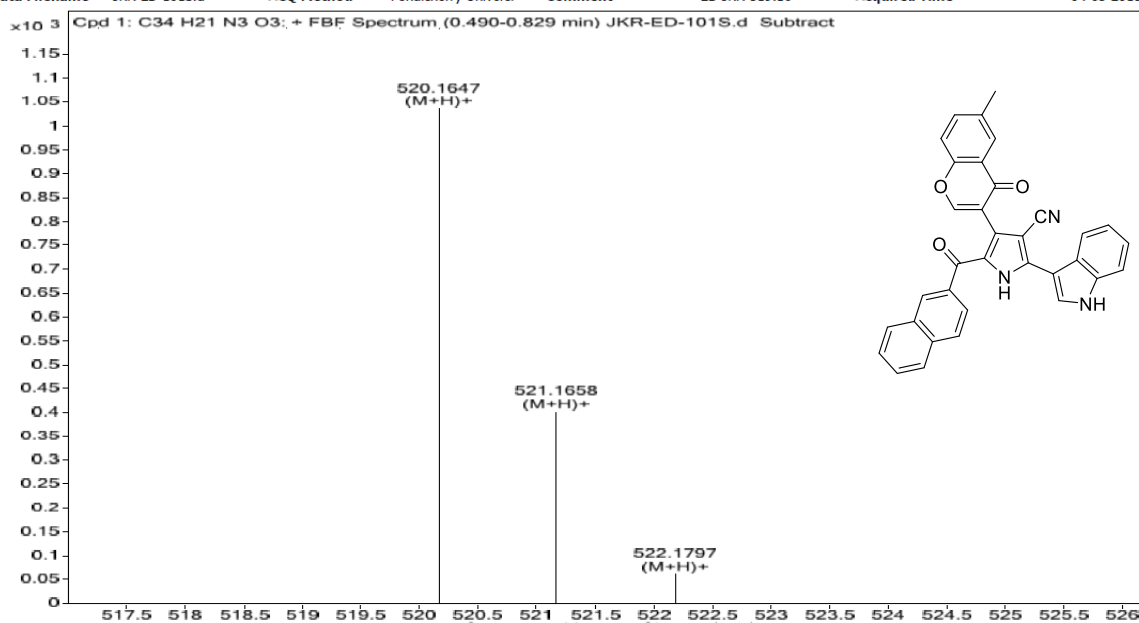

HRMS (ESI) spectrum of **4n**

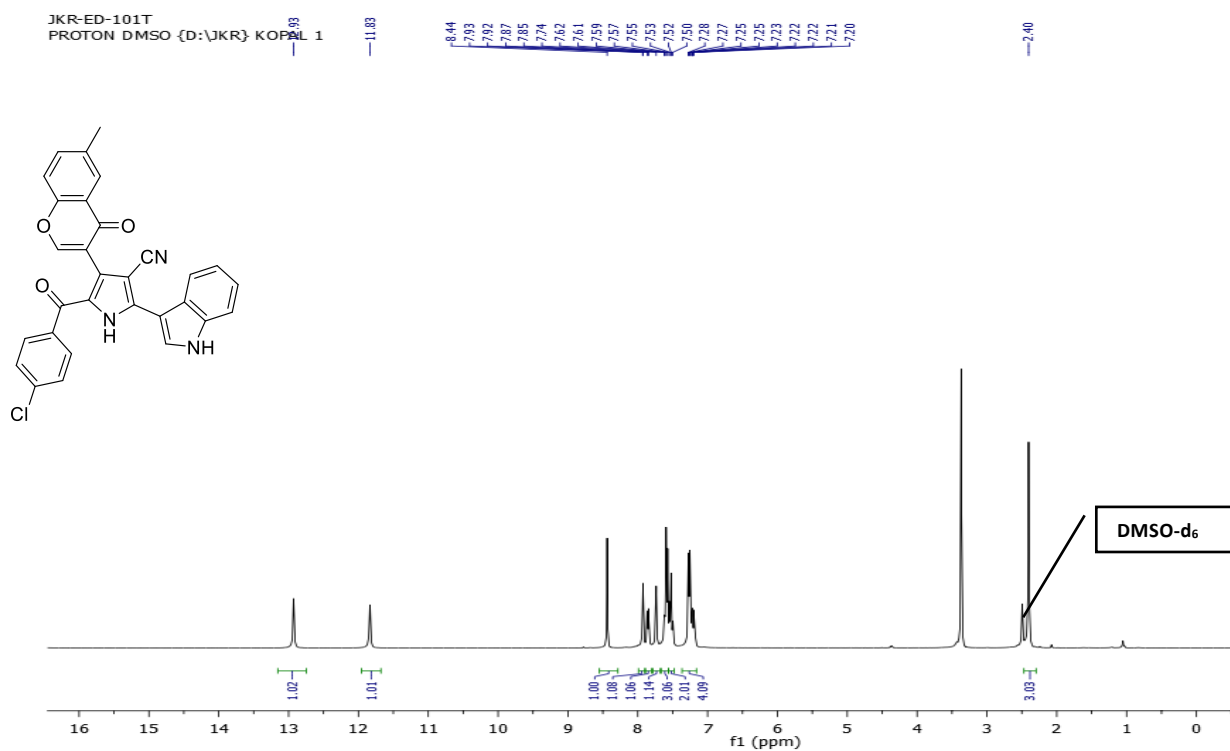

$^1\text{H}$  NMR spectrum of **4o** (400 MHz, DMSO- $d_6$ )

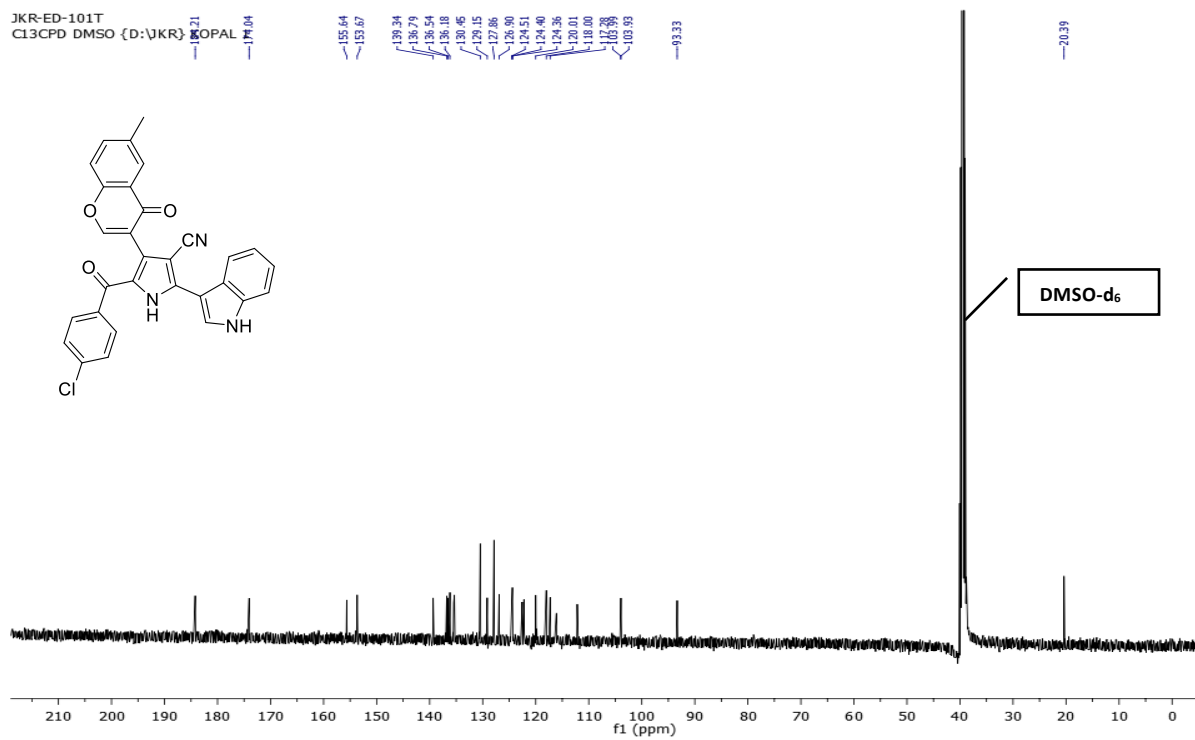

$^{13}\text{C}\{^1\text{H}\}$  NMR spectrum of **4o** (100 MHz, DMSO- $d_6$ )

JKR-ED-101T  
C13DEPT135 DMSO {D:\JKR} KOPAL 1

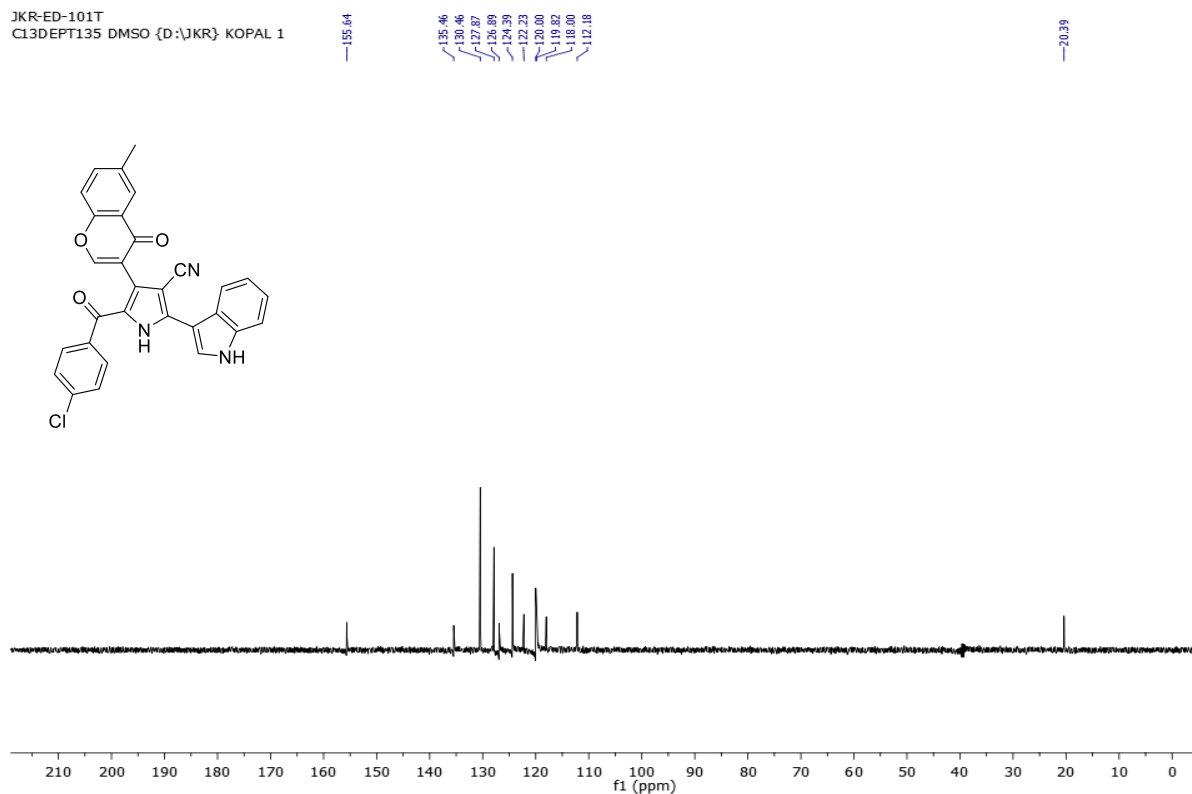

DEPT 135 NMR spectrum of **4o** (100 MHz, DMSO-*d*<sub>6</sub>)

| Sample Name   | JKR-ED-101T   | Position    | Instrument Name | Q-TOF         | User Name              | QTOF-PU\admin       |
|---------------|---------------|-------------|-----------------|---------------|------------------------|---------------------|
| Inj Vol       | -1            | InjPosition | Sample          | Sample        | IRM Calibration Status | Success             |
| Data Filename | JKR-ED-101T.d | ACQ Method  | Comment         | JKR-ED-503.10 | Acquired Time          | 08-05-2018 15:14:14 |

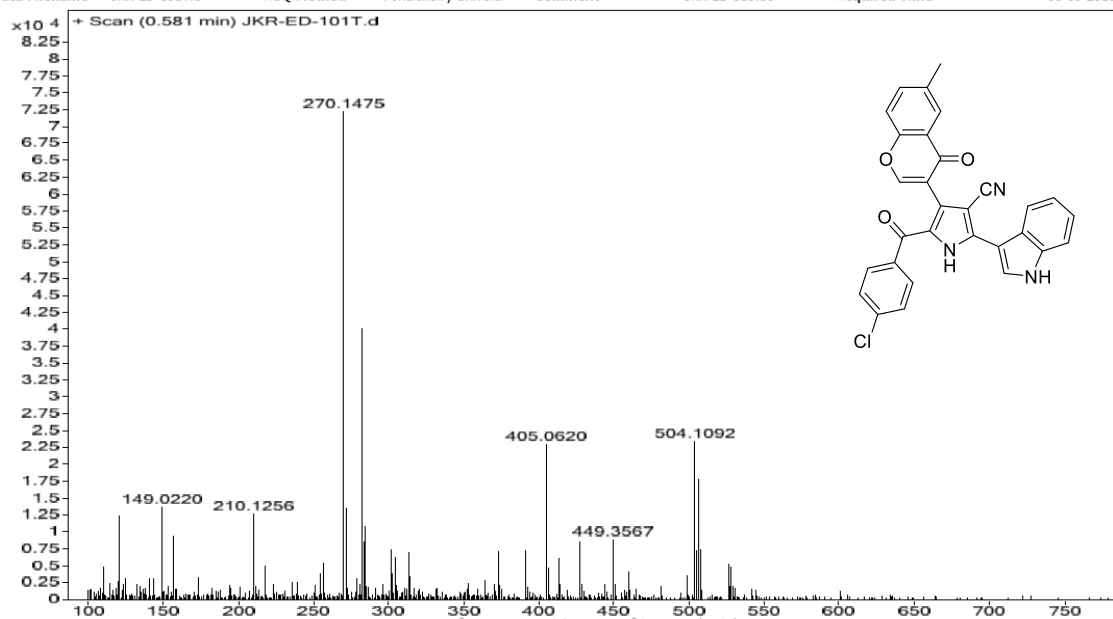

HRMS (ESI) spectrum of **4o**

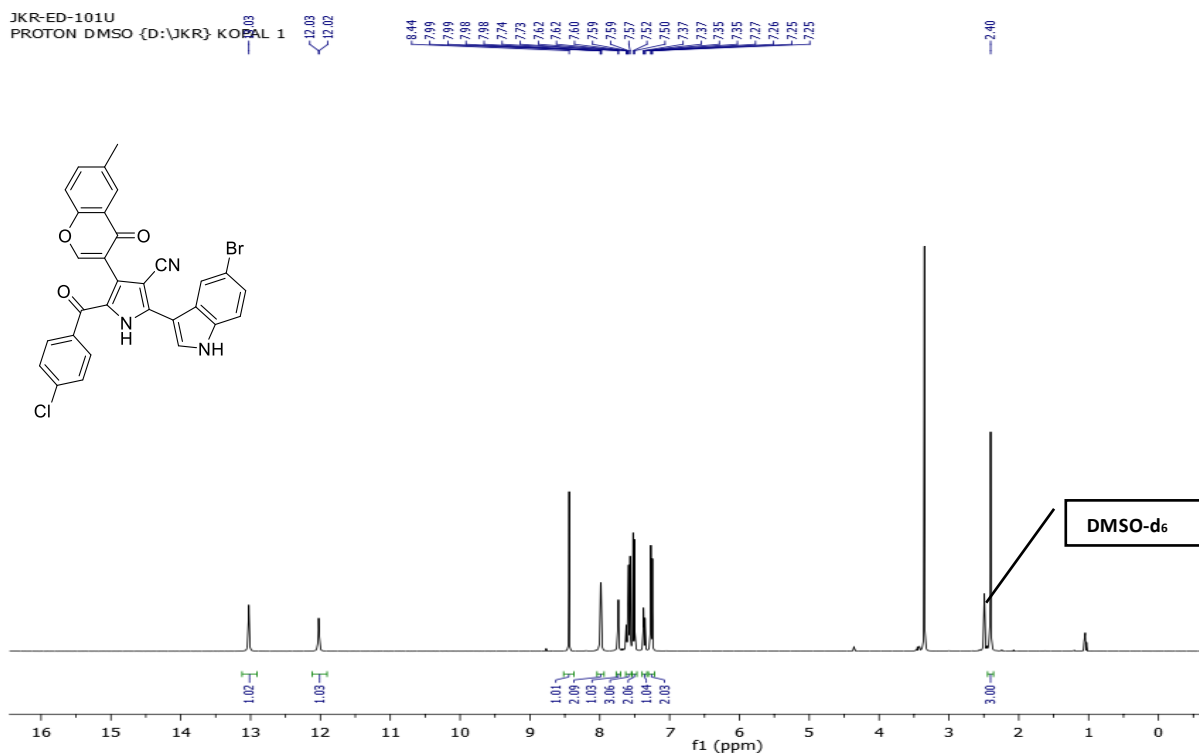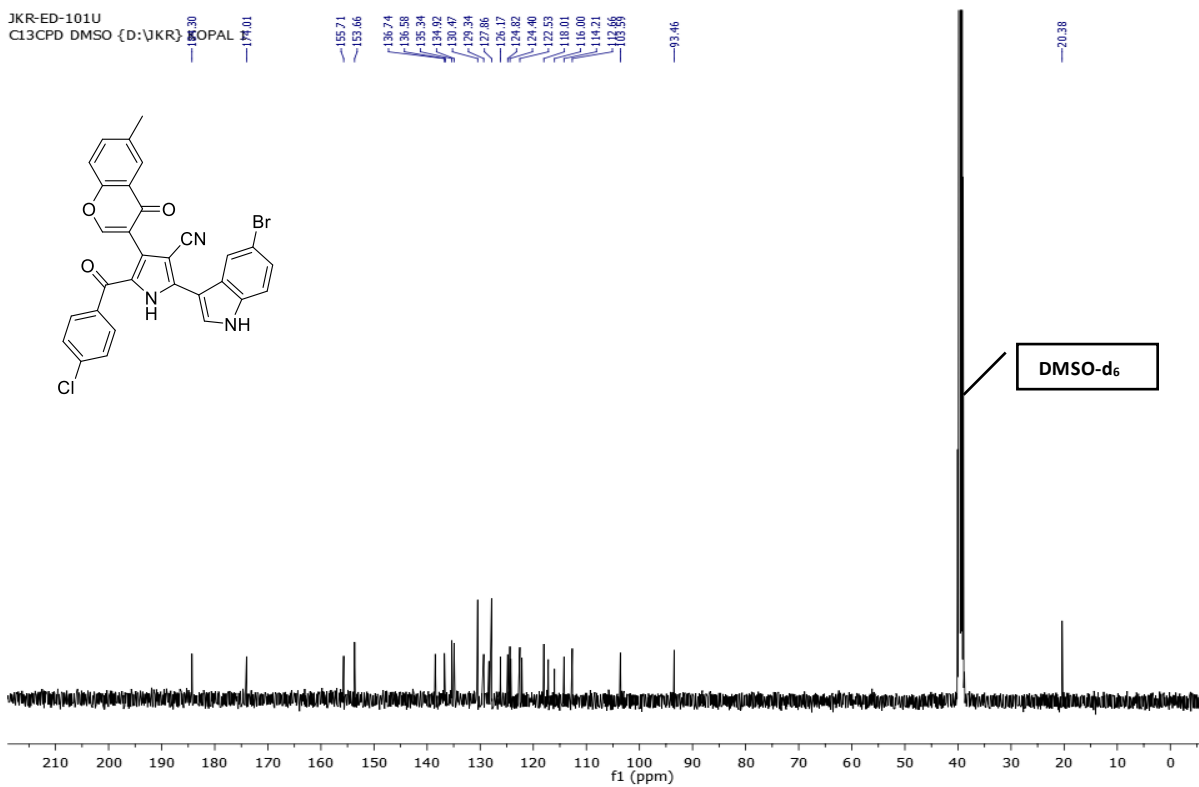

JKR-ED-101U  
CL3DEPT135 DMSO {D:\JKR} KOPAL 1

155.71

135.48  
130.47  
128.34  
127.86  
124.82  
124.40  
122.15  
118.01  
114.21

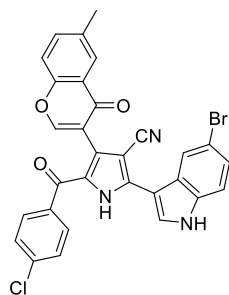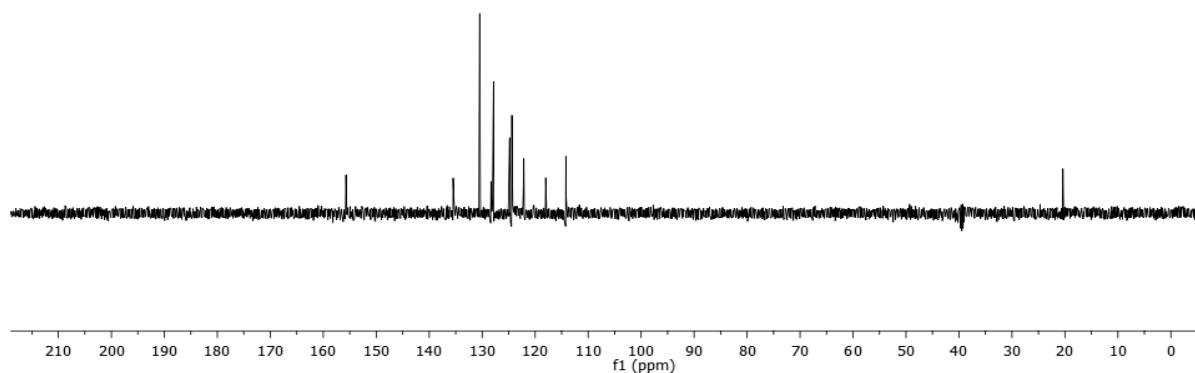

DEPT 135 NMR spectrum of **4p** (100 MHz, DMSO- $d_6$ )

| Sample Name   | JKR-ED-101U   | Position    |                      | Instrument Name | Q-TOF         | User Name              | QTOF-PU/admin       |
|---------------|---------------|-------------|----------------------|-----------------|---------------|------------------------|---------------------|
| Inj Vol       | -1            | InjPosition |                      | SampleType      | Sample        | IRM Calibration Status | Success             |
| Data Filename | JKR-ED-101U.d | ACQ Method  | Pondicherry Universi | Comment         | JKR-ED-581.01 | Acquired Time          | 08-05-2018 15:03:07 |

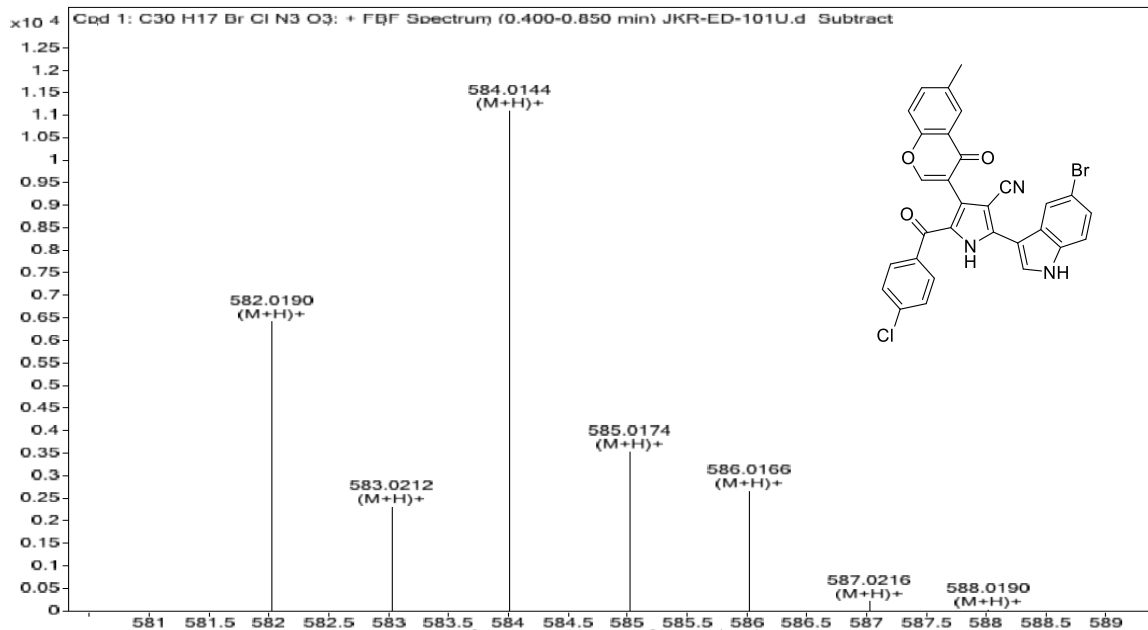

HRMS (ESI) spectrum of **4p**

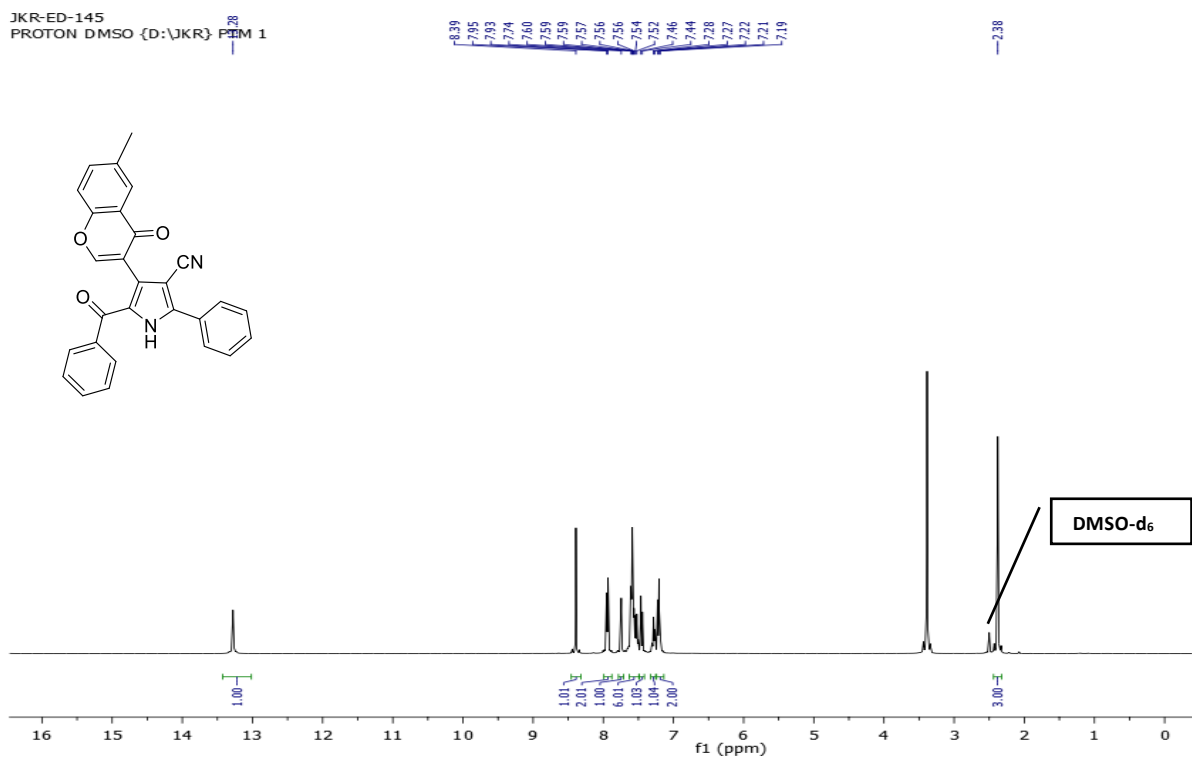

<sup>1</sup>H NMR spectrum of **4q** (400 MHz, DMSO-*d*<sub>6</sub>)

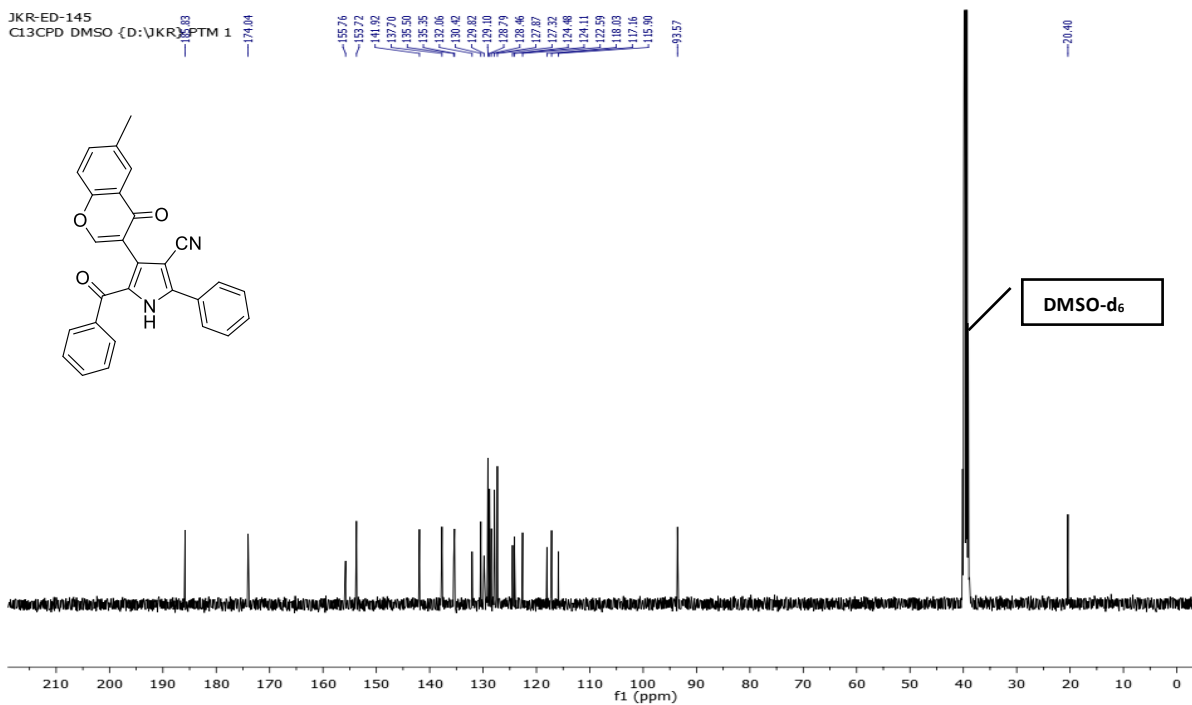

<sup>13</sup>C {<sup>1</sup>H} NMR spectrum of **4q** (100 MHz, DMSO-*d*<sub>6</sub>)



JKR-ED-145  
C13DEPT135 DMSO {D:\JKR} PTM 1

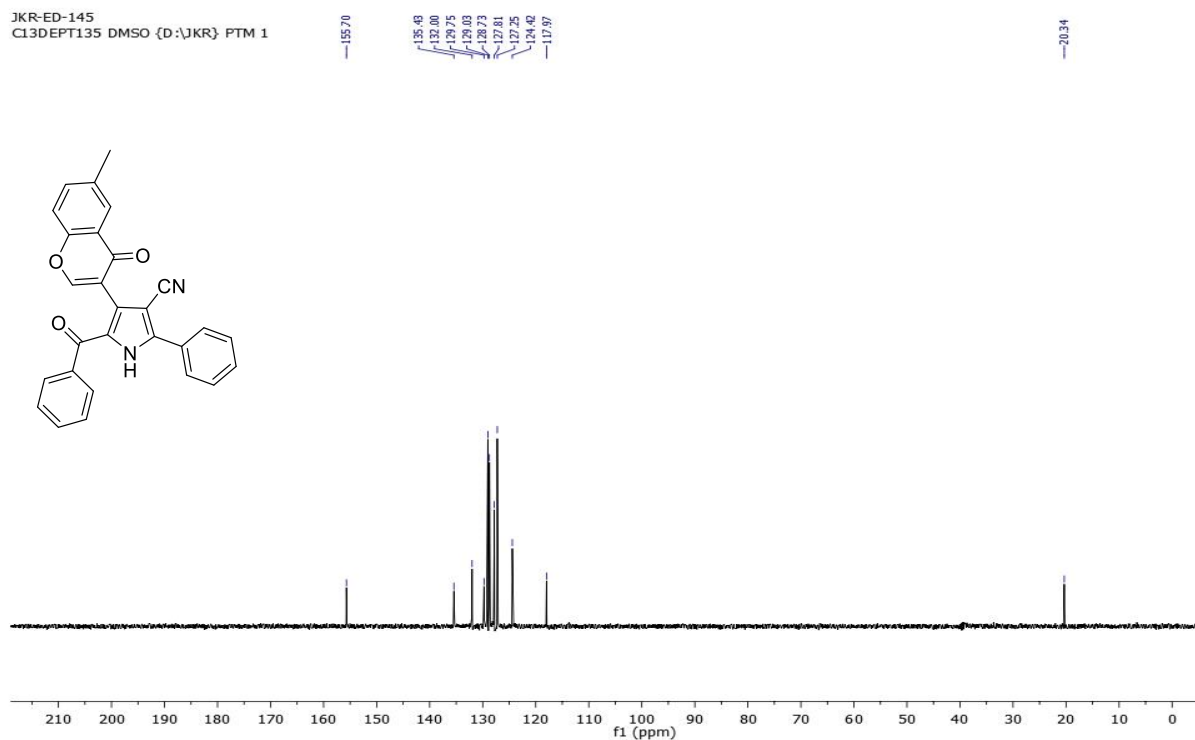

DEPT 135 NMR spectrum of **4q** (100 MHz, DMSO-*d*<sub>6</sub>)

| Sample Name   | JKR-ED-145   | Position    |                      | Instrument Name | Q-TOF           | User Name              | QTOF-PU\admin       |
|---------------|--------------|-------------|----------------------|-----------------|-----------------|------------------------|---------------------|
| Inj Vol       | -1           | InjPosition |                      | SampleType      | Sample          | IRM Calibration Status | Success             |
| Data Filename | JKR-ED-145.d | ACQ Method  | Pondicherry Universi | Comment         | ED-JKR-430.1317 | Acquired Time          | 14-08-2018 12:33:06 |

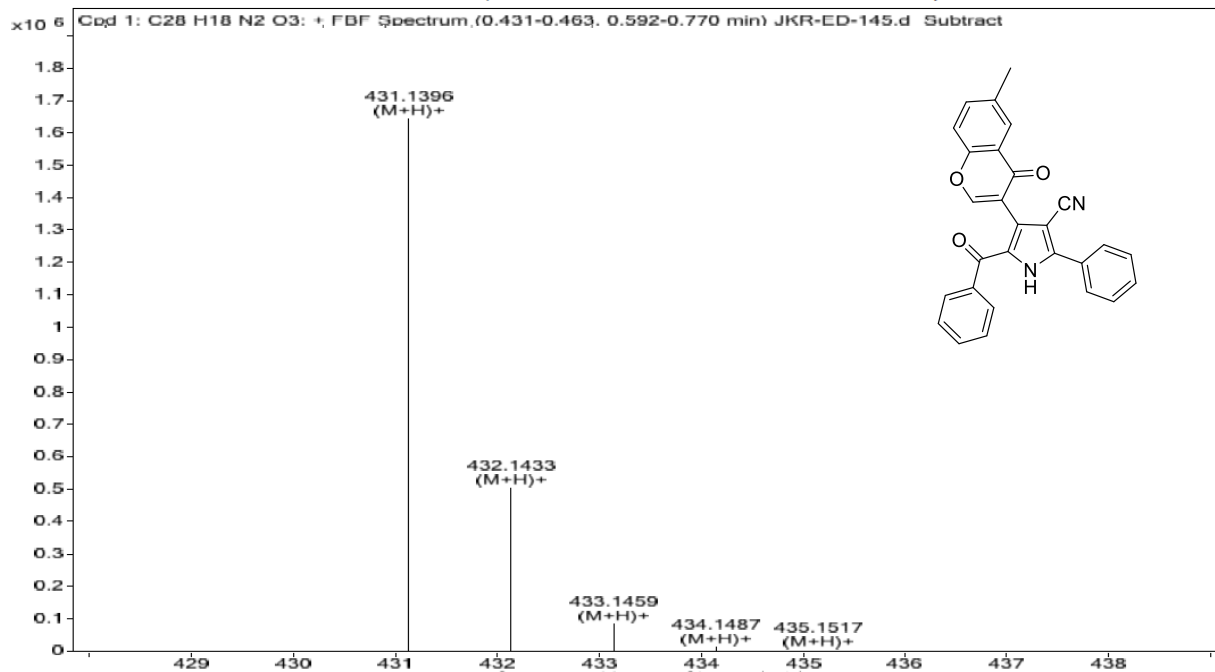

HRMS (ESI) spectrum of **4q**

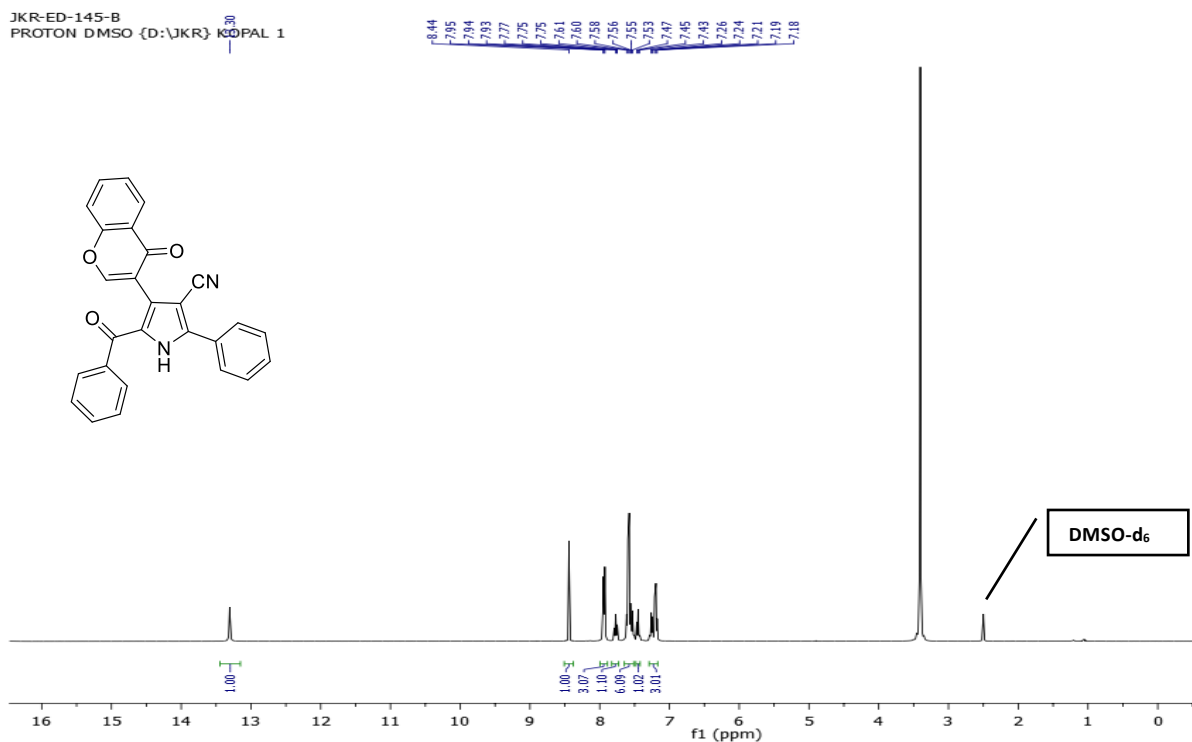

<sup>1</sup>H NMR spectrum of **4r** (400 MHz, DMSO-*d*<sub>6</sub>)

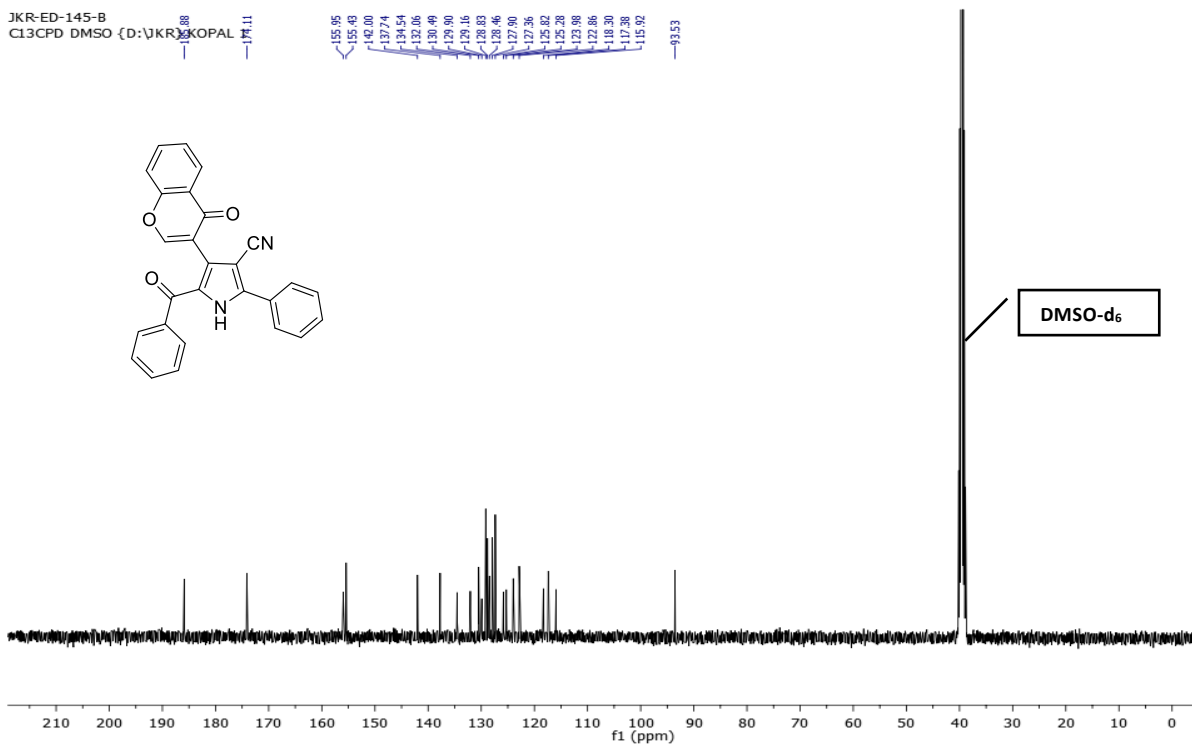

<sup>13</sup>C{<sup>1</sup>H} NMR spectrum of **4r** (100 MHz, DMSO-*d*<sub>6</sub>)

JKR-ED-145-B  
C13DEPT135 DMSO (D-;JKR) KOPAL 1

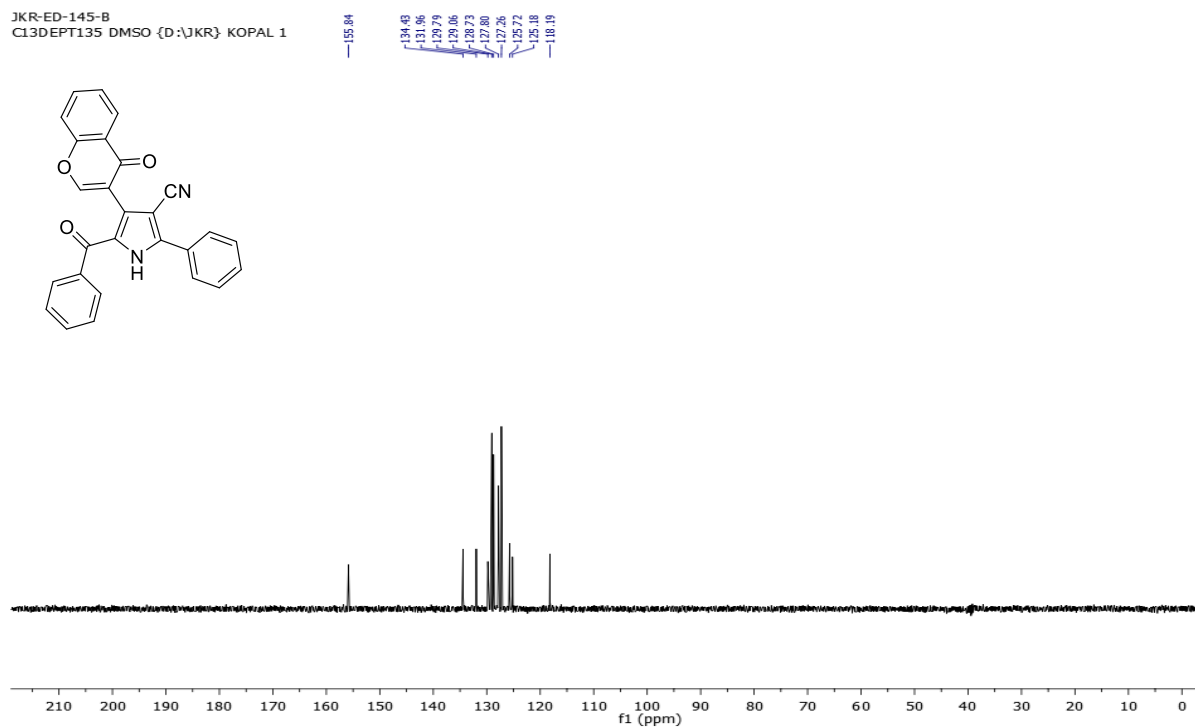

DEPT 135 NMR spectrum of **4r** (100 MHz, DMSO- $d_6$ )

| Sample Name   | Position             | Instrument Name | User Name              |
|---------------|----------------------|-----------------|------------------------|
| JKR-ED-145B   | -1                   | Q-TOF           | QTOF-PU\admin          |
| Inj Vol       | JKR-ED-145B.d        | Sample          | IRM Calibration Status |
| Data Filename | ACQ Method           | Comment         | Acquired Time          |
|               | Pondicherry Universi | ED-JKR-416.1161 | Success                |
|               |                      |                 | 10-09-2018 12:43:22    |

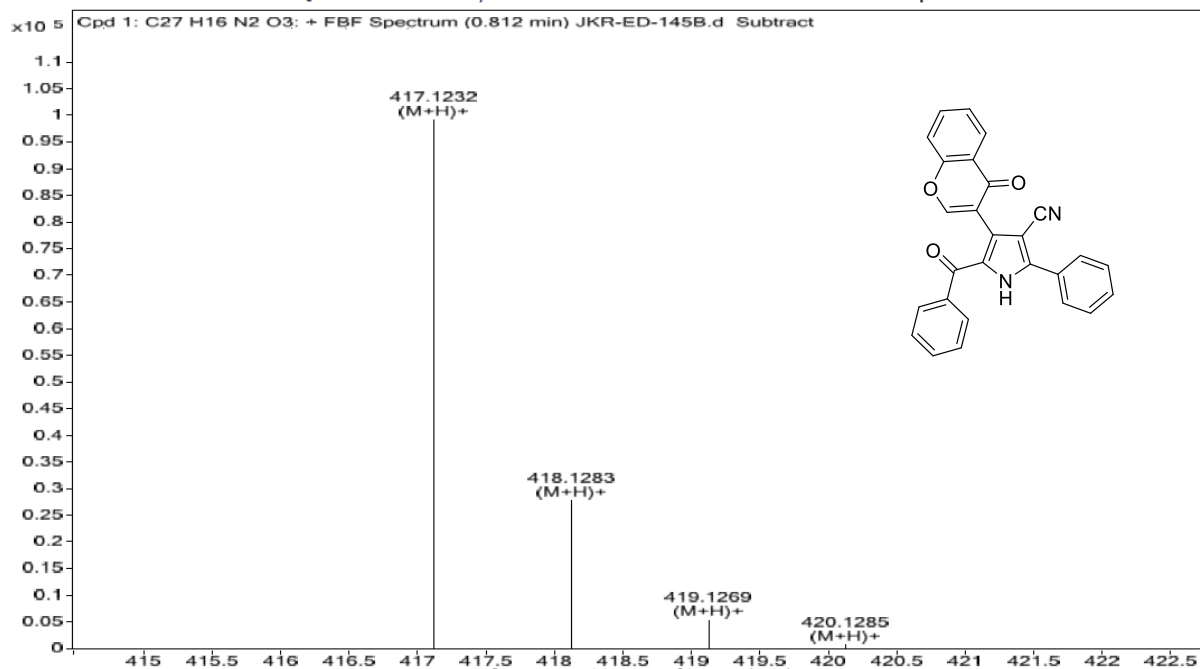

HRMS (ESI) spectrum of **4r**

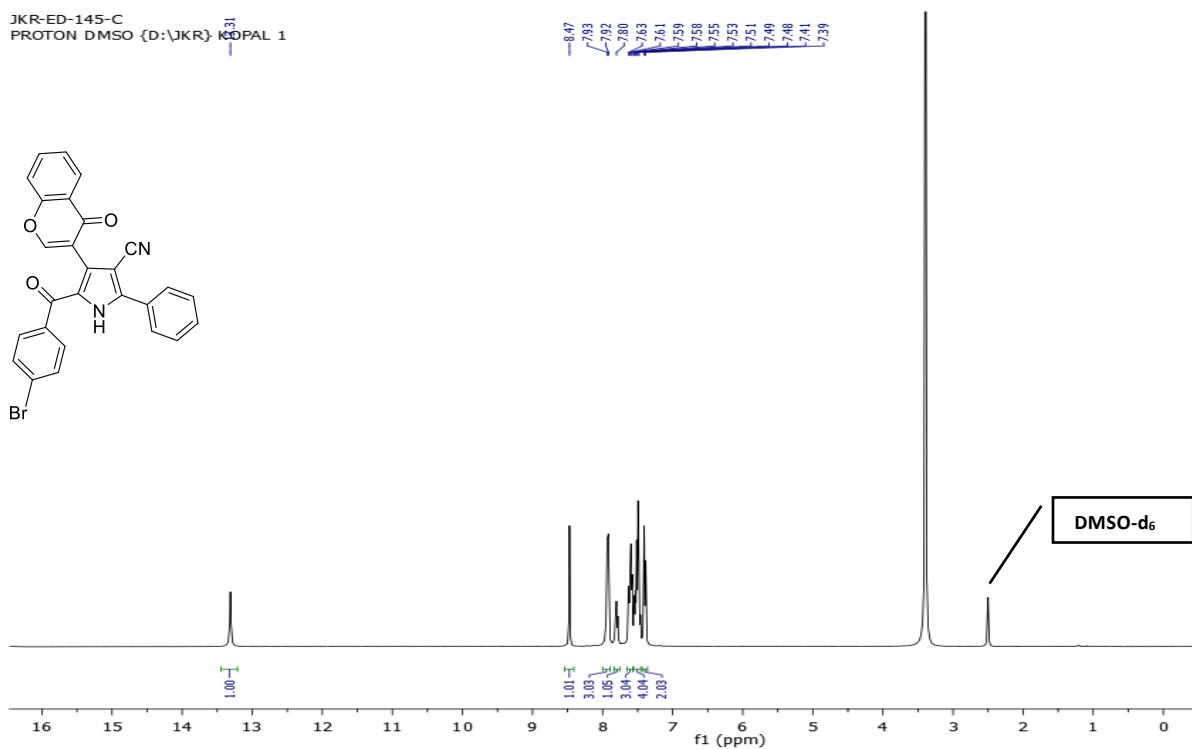

<sup>1</sup>H NMR spectrum of **4s** (400 MHz, DMSO-*d*<sub>6</sub>)

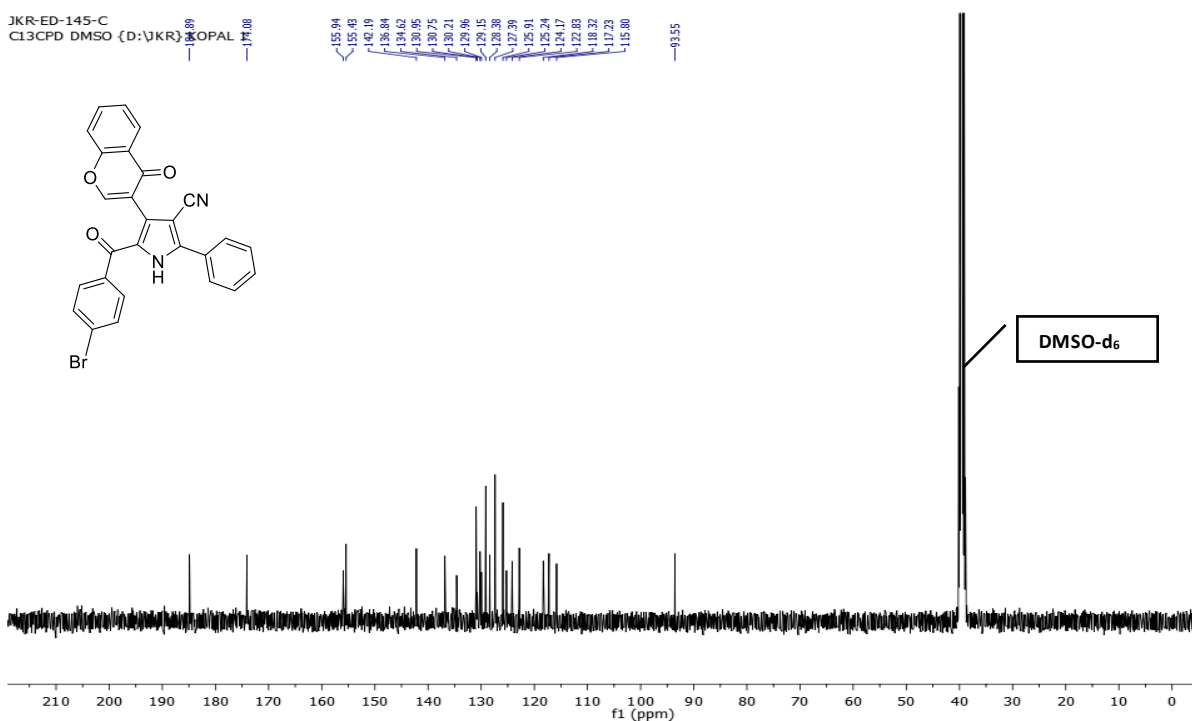

<sup>13</sup>C{<sup>1</sup>H} NMR spectrum of **4s** (100 MHz, DMSO-*d*<sub>6</sub>)

JKR-ED-145-C  
C13DEPT135 DMSO (D:\JKR) KOPAL 1

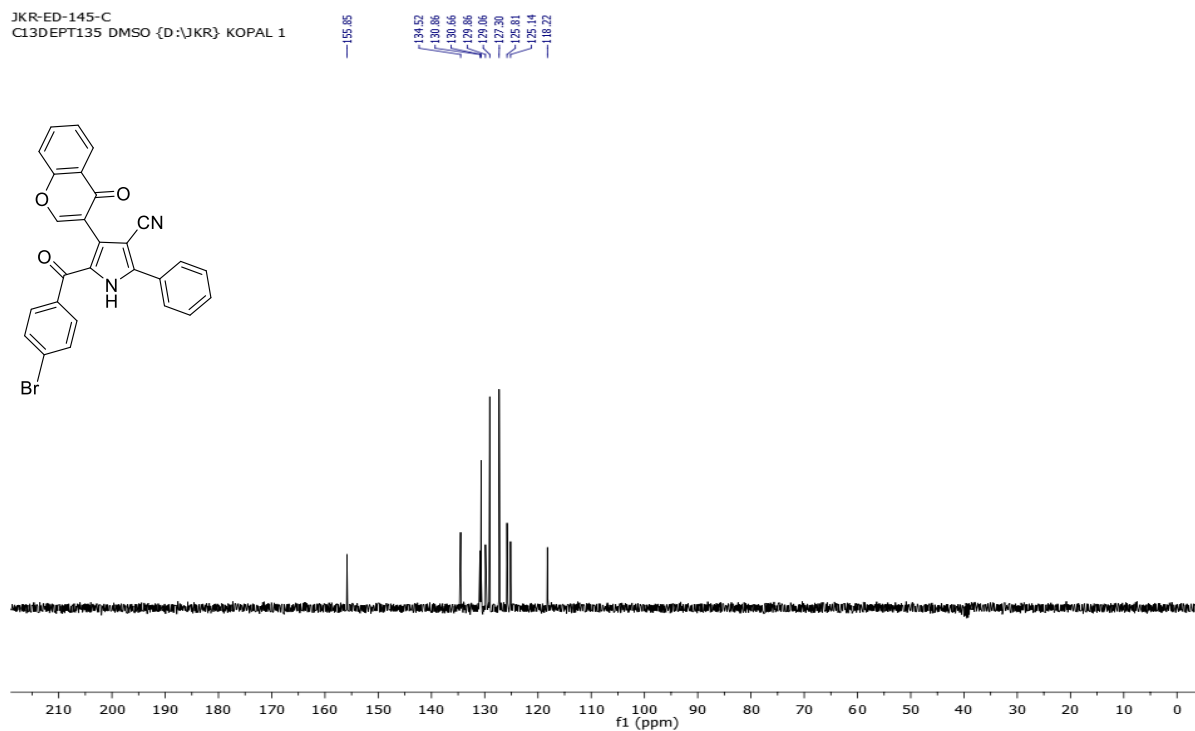

DEPT 135 NMR spectrum of **4s** (100 MHz, DMSO-*d*<sub>6</sub>)

| Sample Name   | JKR-ED-145C   | Position    |                      | Instrument Name | Q-TOF           | User Name              | QTOF-PU/admin       |
|---------------|---------------|-------------|----------------------|-----------------|-----------------|------------------------|---------------------|
| Inj Vol       | -1            | InjPosition |                      | SampleType      | Sample          | IRM Calibration Status | Success             |
| Data Filename | JKR-ED-145C.d | ACQ Method  | Pondicherry Universi | Comment         | ED-JKR-494.0266 | Acquired Time          | 10-09-2018 12:36:56 |

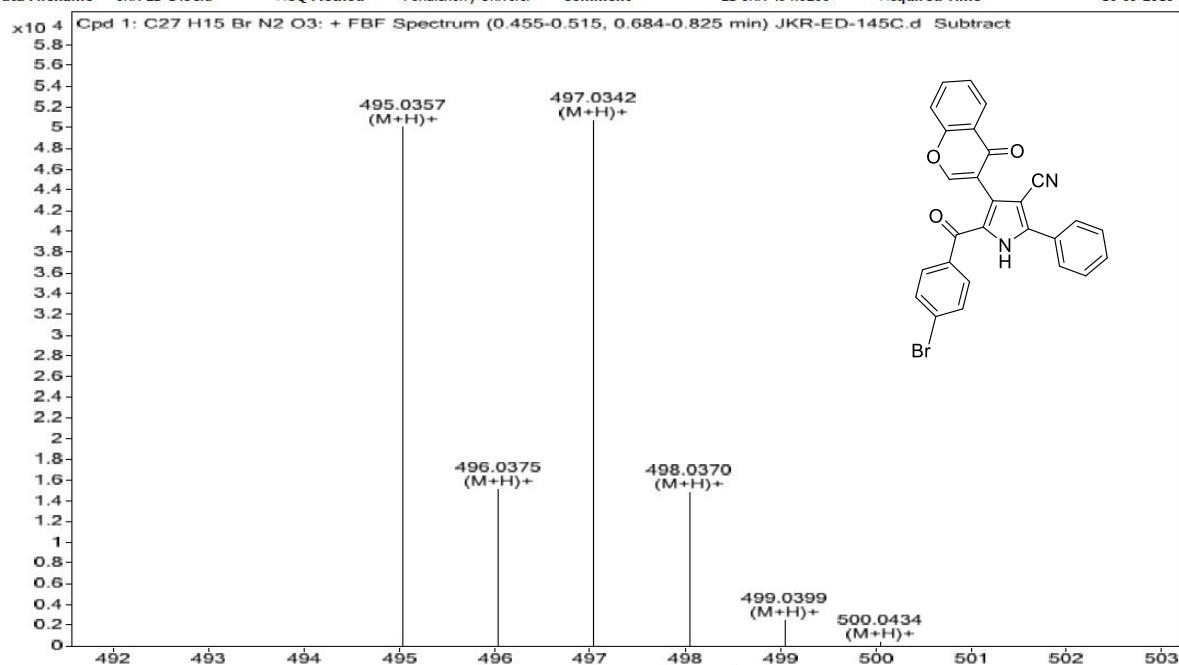

HRMS (ESI) spectrum of **4s**

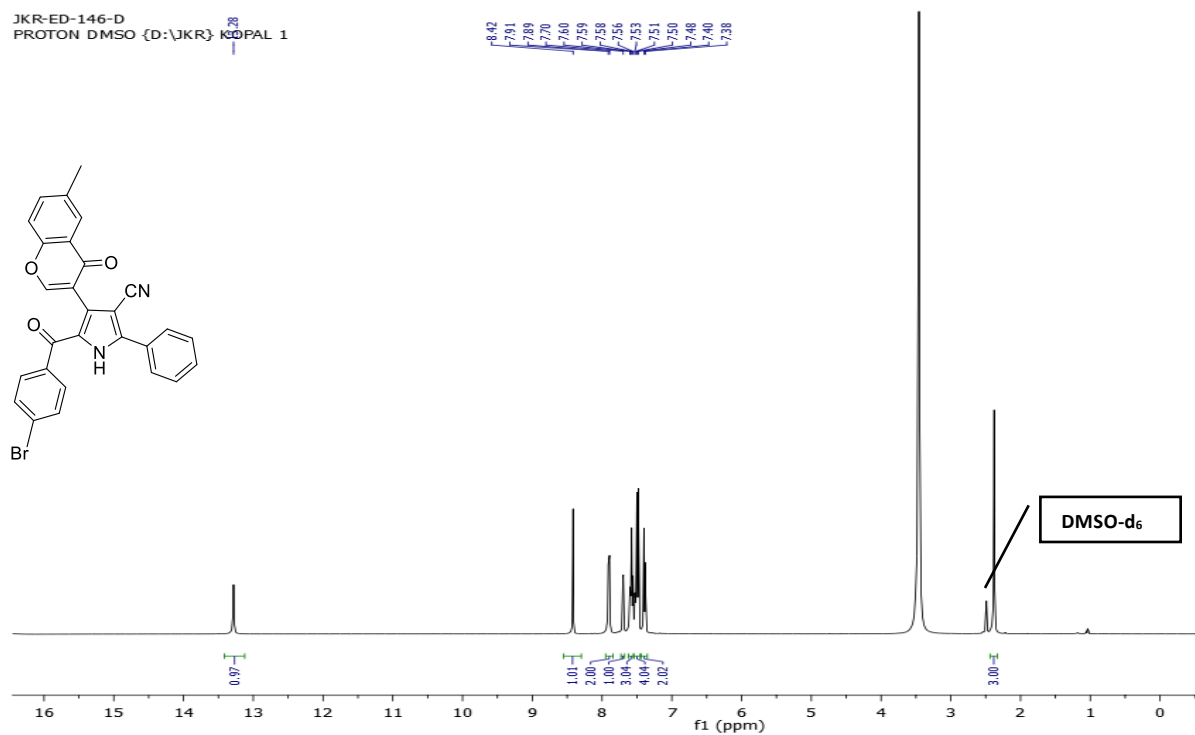

$^1\text{H}$  NMR spectrum of **4t** (400 MHz, DMSO- $d_6$ )

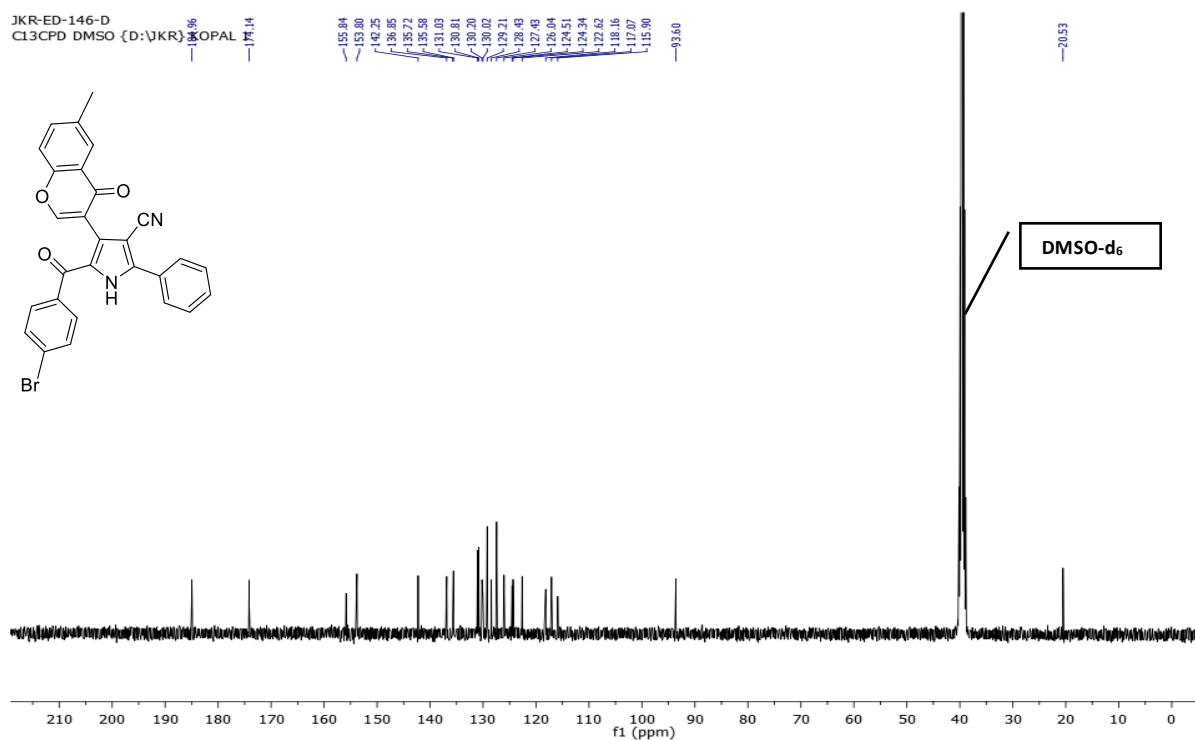

$^{13}\text{C}\{^1\text{H}\}$  NMR spectrum of **4t** (100 MHz, DMSO- $d_6$ )

JKR-ED-146-D  
C13DEPT135 DMSO {D:\JKR\ KOPAL 1

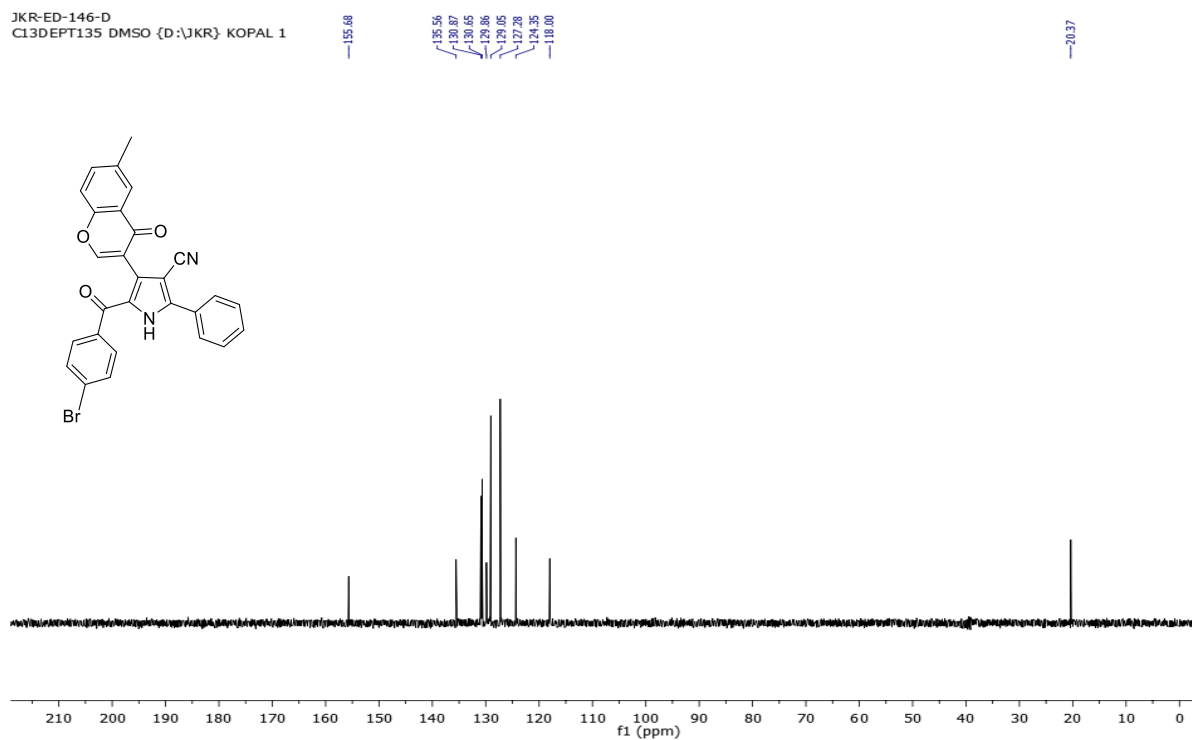

DEPT 135 NMR spectrum of **4t** (100 MHz, DMSO-*d*<sub>6</sub>)

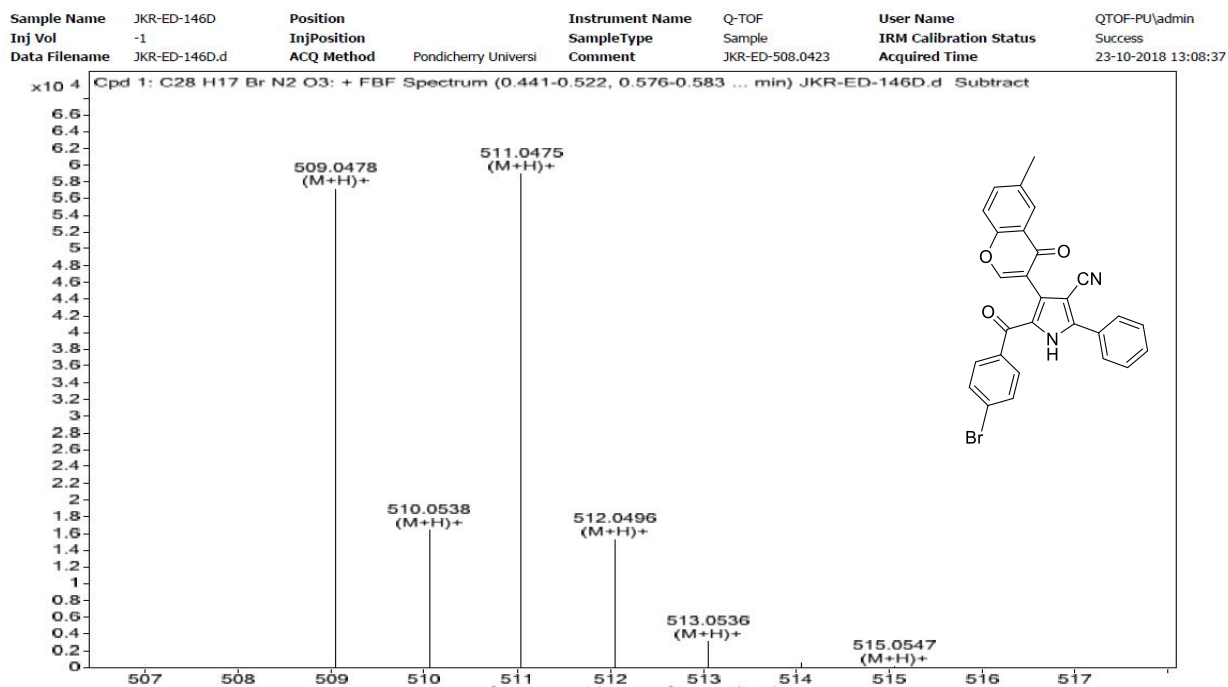

HRMS (ESI) spectrum of **4t**

JKR-ED-101W  
PROTON DMSO {D:\JKR} KOPAL 1

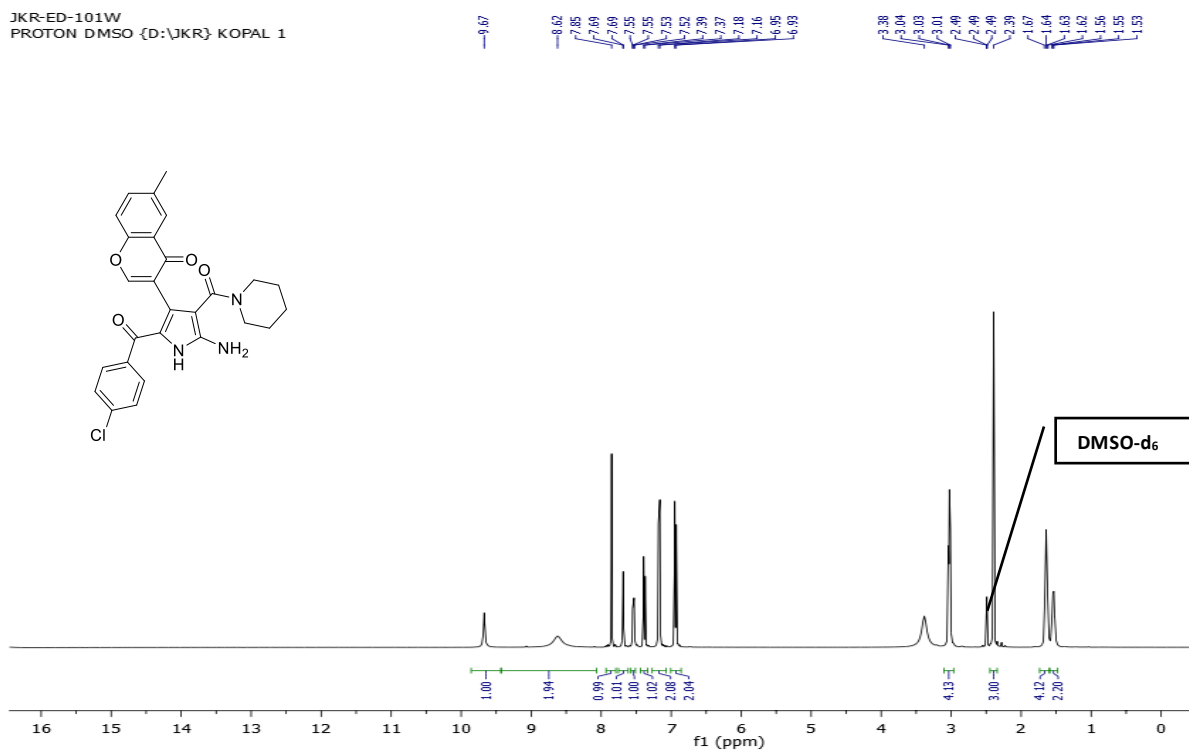

<sup>1</sup>H NMR spectrum of **8a** (400 MHz, DMSO-*d*<sub>6</sub>)

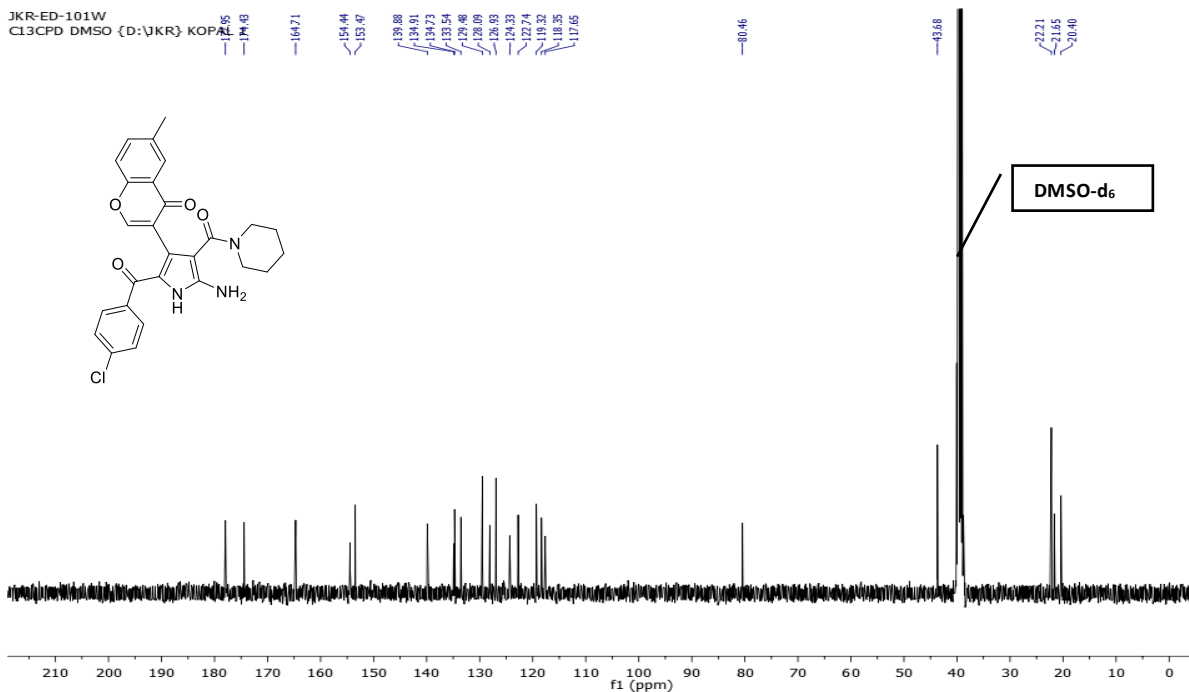

<sup>13</sup>C{<sup>1</sup>H} NMR spectrum of **8a** (100 MHz, DMSO-*d*<sub>6</sub>)



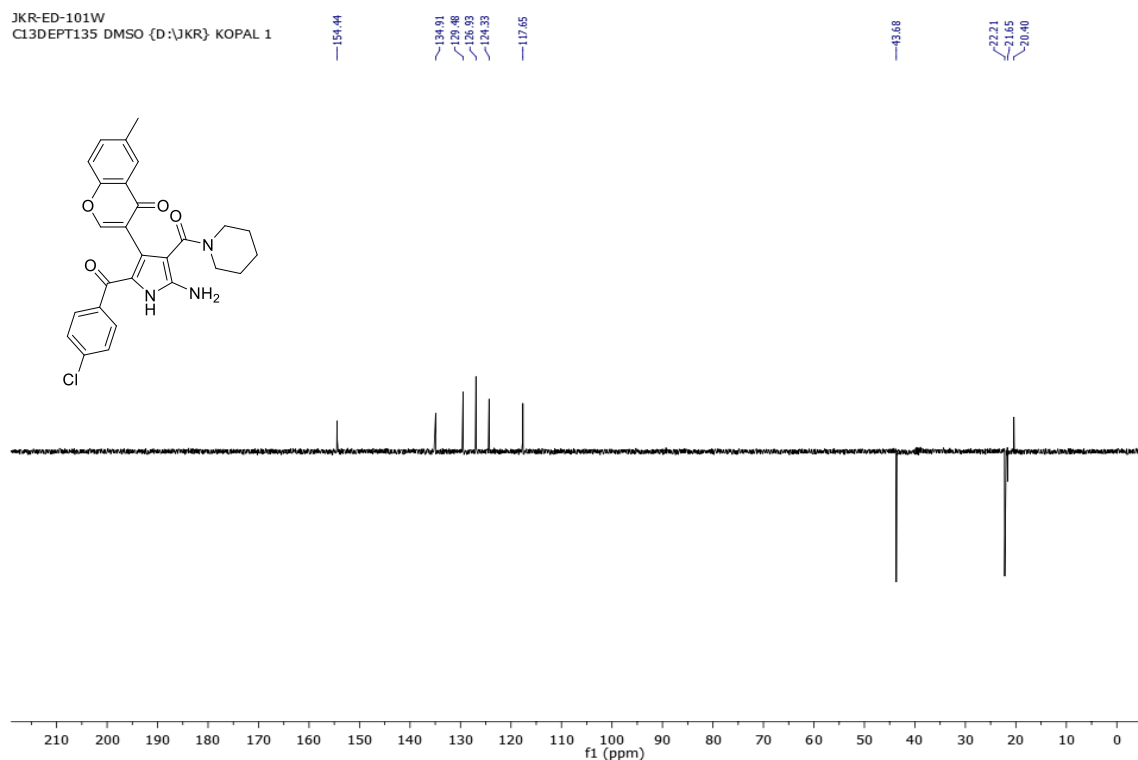

DEPT 135 NMR spectrum of **8a** (100 MHz, DMSO- $d_6$ )

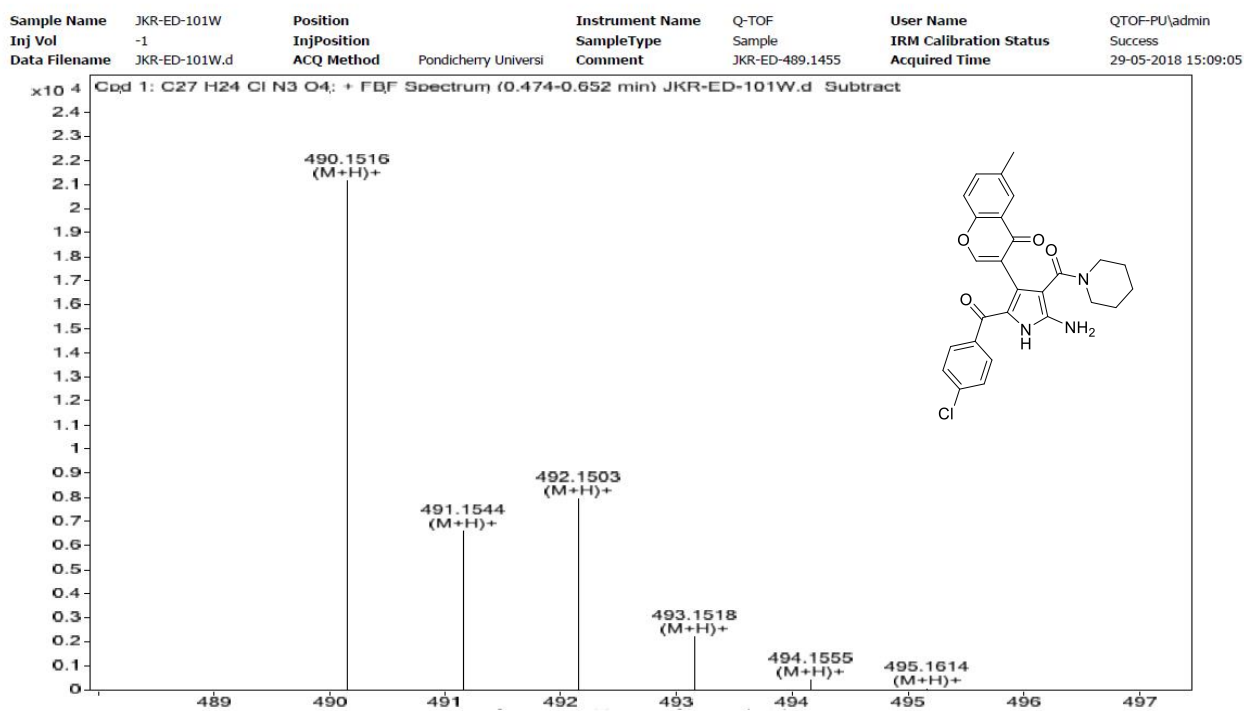

HRMS (ESI) spectrum of **8a**

JKR-101X  
PROTON DMSO {D:\JKR} KOPAL 1

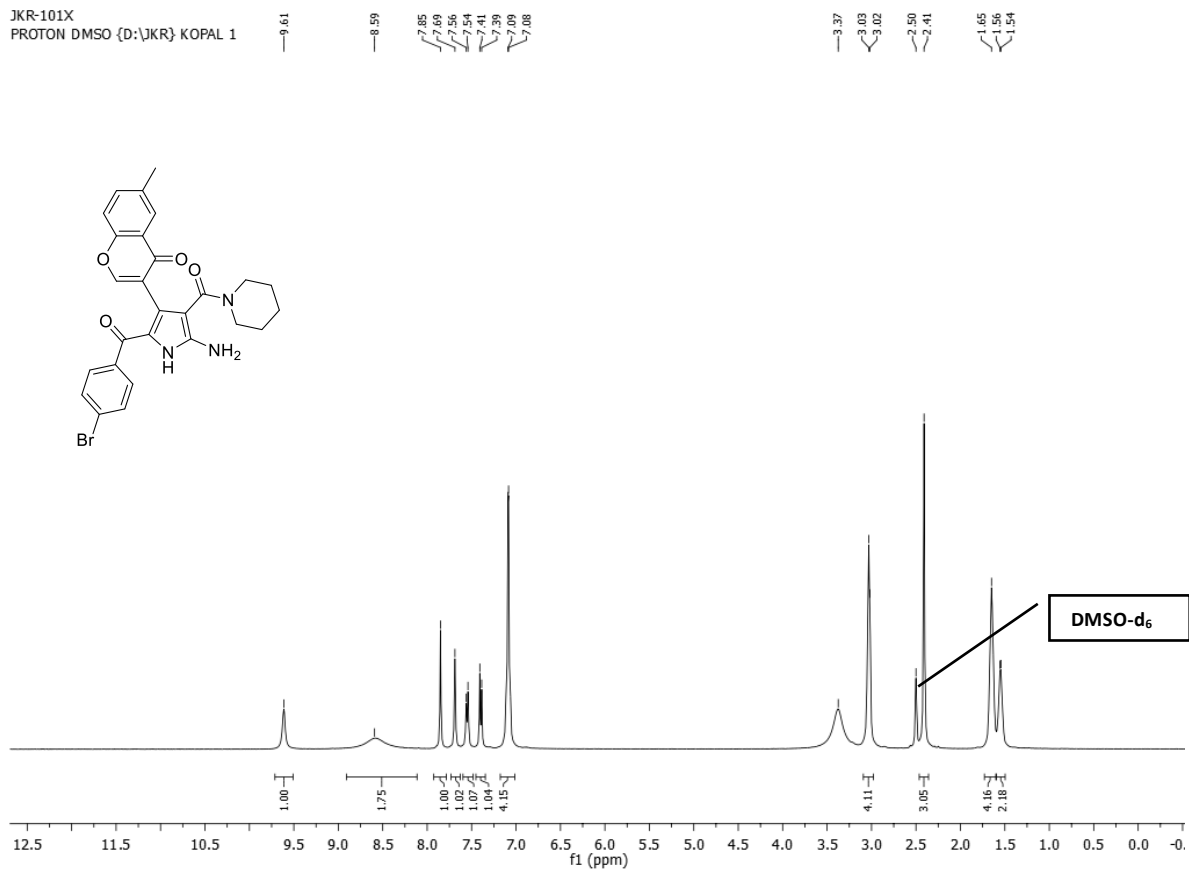

<sup>1</sup>H NMR spectrum of **8b** (400 MHz, DMSO-d<sub>6</sub>)

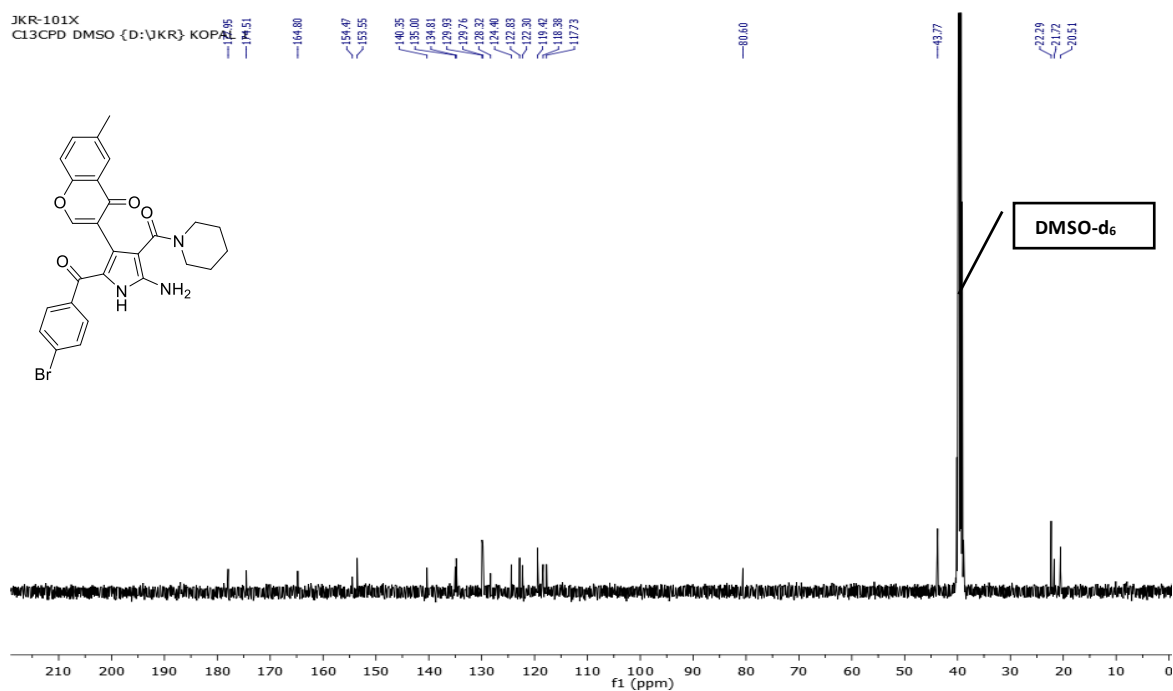

<sup>13</sup>C{<sup>1</sup>H} NMR spectrum of **8b** (100 MHz, DMSO-d<sub>6</sub>)

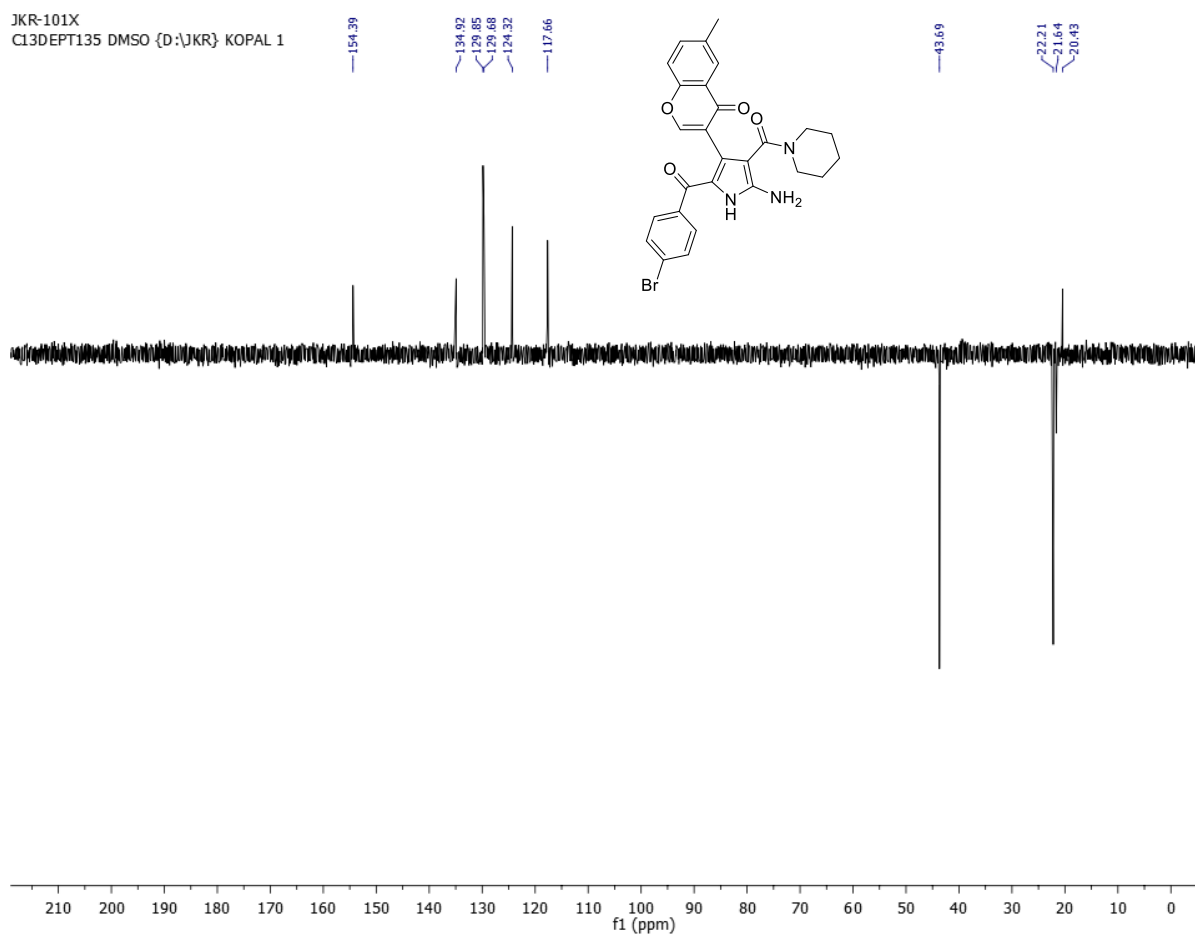

DEPT 135 NMR spectrum of **8b** (100 MHz, DMSO-*d*<sub>6</sub>)

JKR-ED-101W  
PROTON DMSO {D:\JKR} KOPAL 1

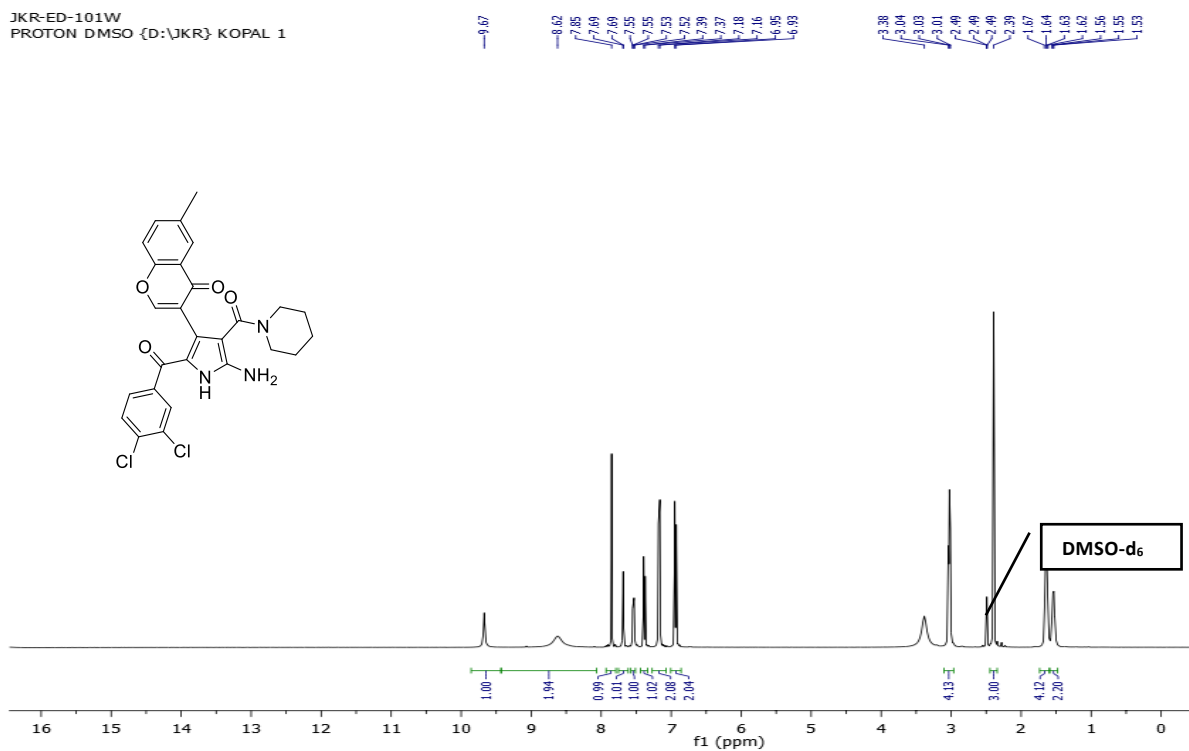

<sup>1</sup>H NMR spectrum of **8c** (400 MHz, DMSO-*d*<sub>6</sub>)

JKR-ED-101Y  
C13CPD DMSO {D:\JKR} KOPAL

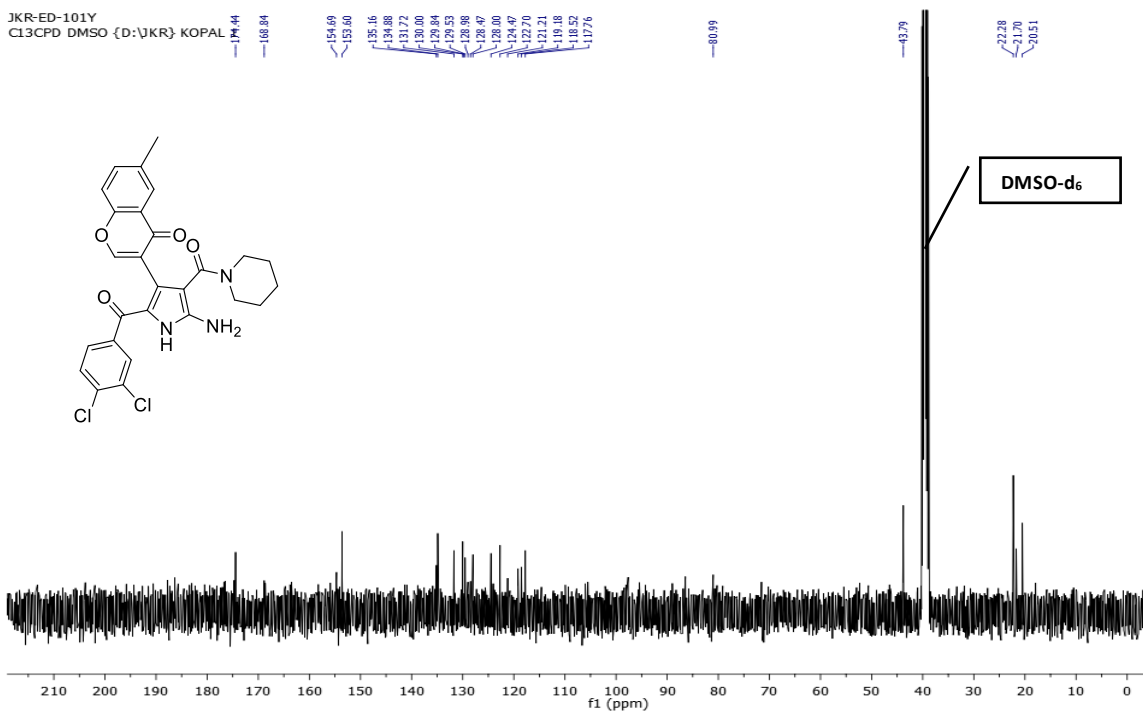

<sup>13</sup>C{<sup>1</sup>H} NMR spectrum of **8c** (100 MHz, DMSO-*d*<sub>6</sub>)

JKR-ED-101Y  
C13DEPT135 DMSO {D:\JKR} KOPAL 1

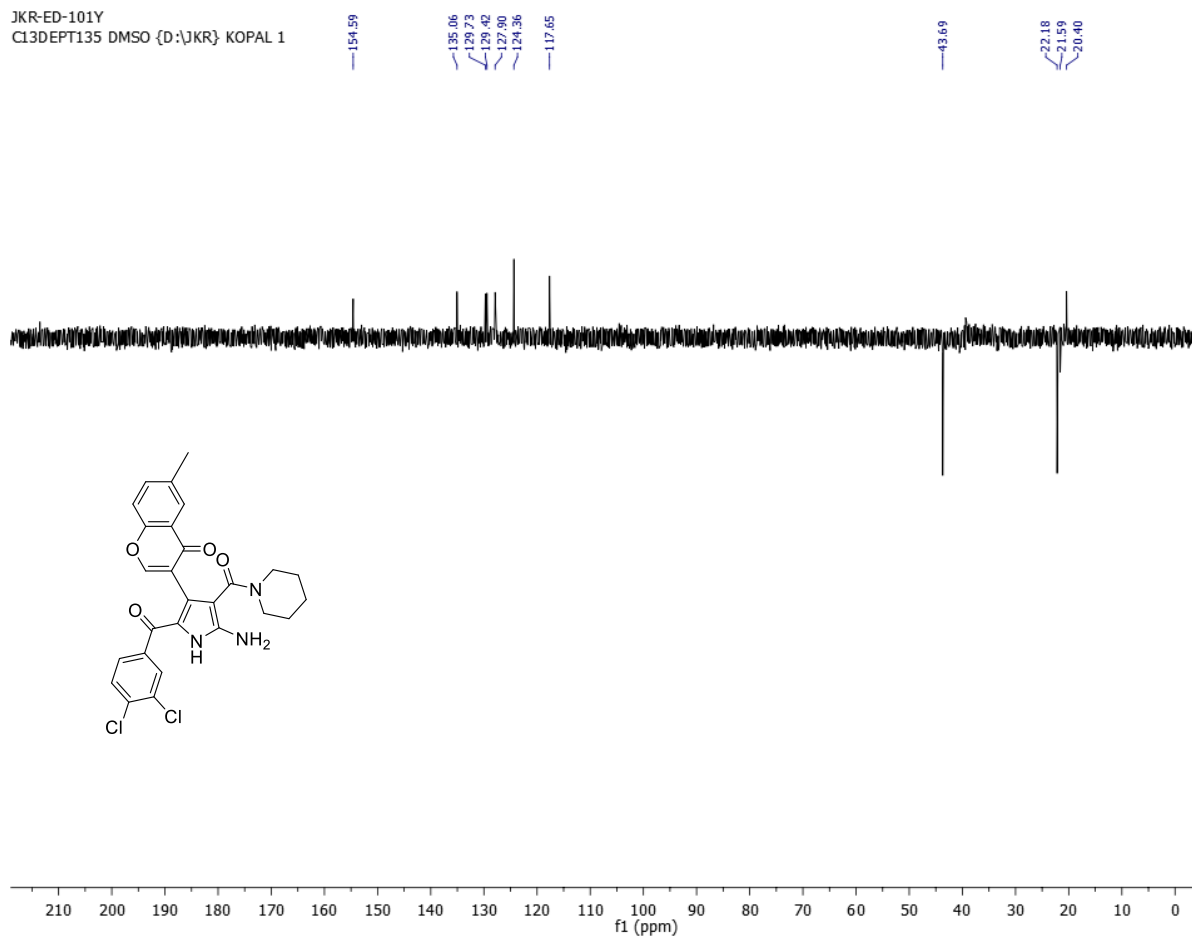

DEPT 135 NMR spectrum of **8c** (100 MHz, DMSO-*d*<sub>6</sub>)

JKR-ED-101 ZD  
PROTON DMSO {D:\JKR} KOPAL 1

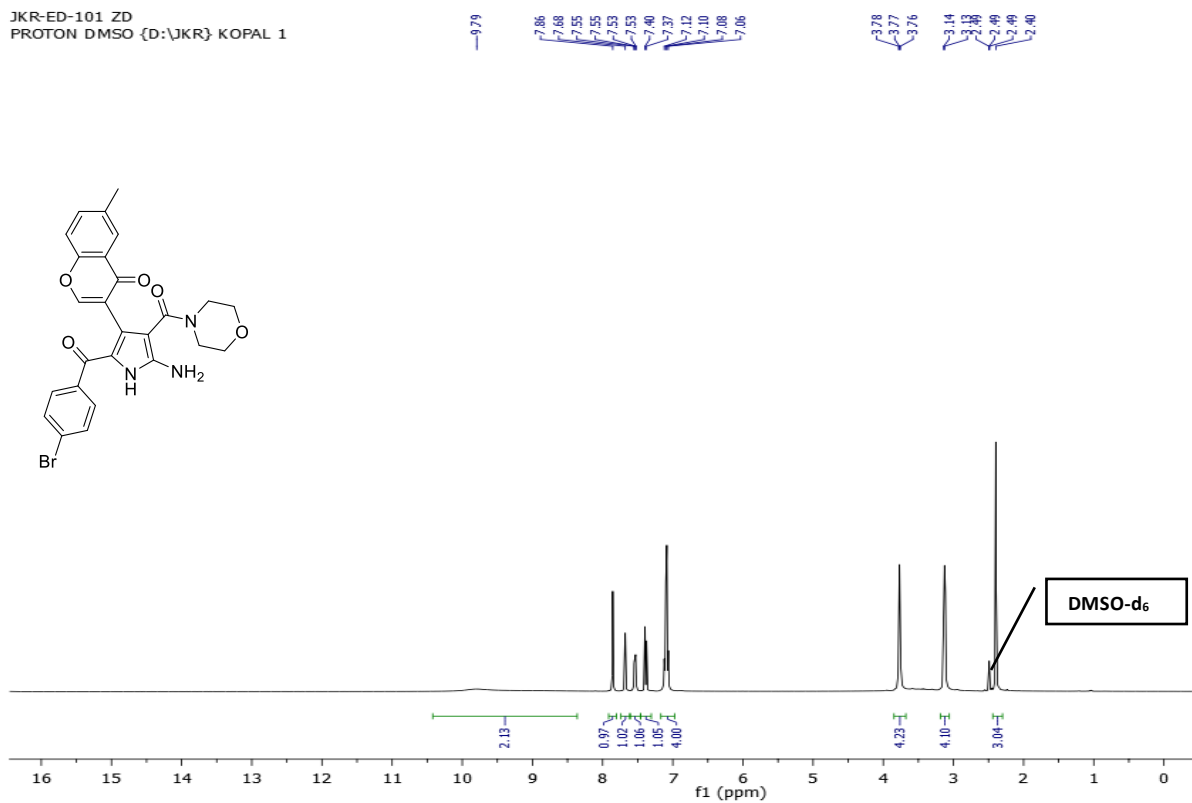

<sup>1</sup>H NMR spectrum of **8d** (400 MHz, DMSO-*d*<sub>6</sub>)

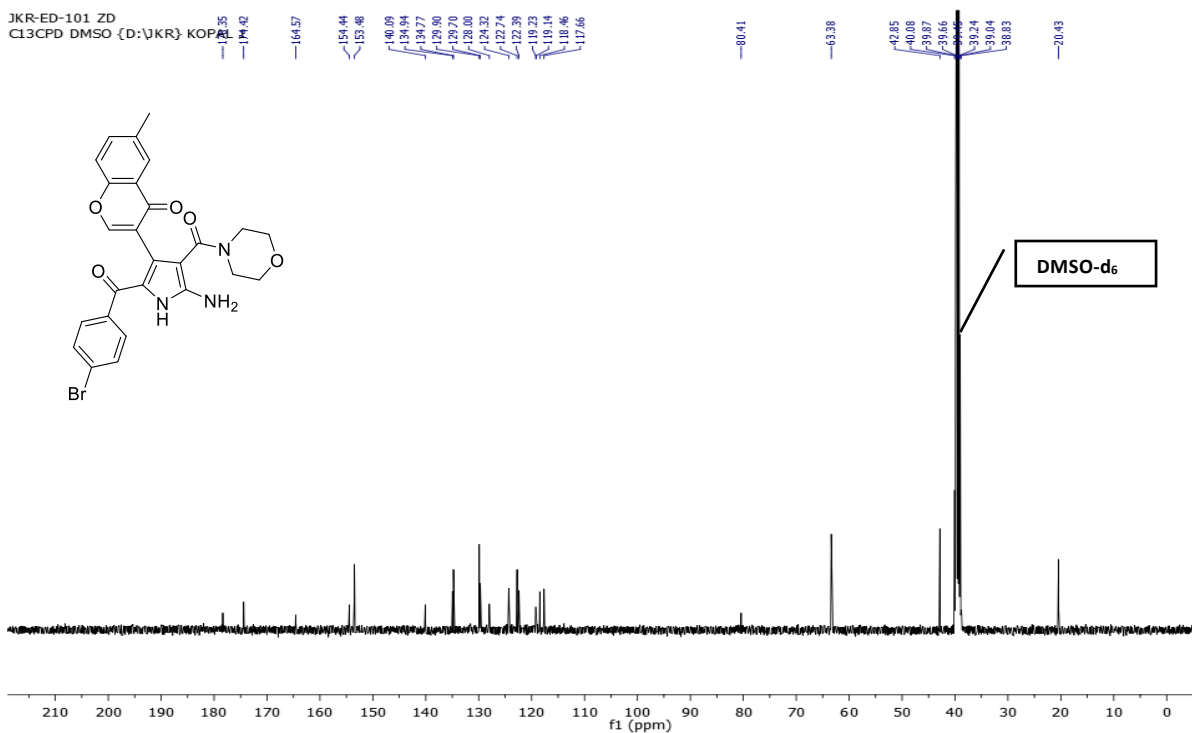

<sup>13</sup>C{<sup>1</sup>H} NMR spectrum of **8d** (100 MHz, DMSO-*d*<sub>6</sub>)

|               |                |             |                      |                 |               |                        |                     |
|---------------|----------------|-------------|----------------------|-----------------|---------------|------------------------|---------------------|
| Sample Name   | JKR-ED-101ZD   | Position    |                      | Instrument Name | Q-TOF         | User Name              | QTOF-PU\admin       |
| Inj Vol       | -1             | InjPosition |                      | SampleType      | Sample        | IRM Calibration Status | Success             |
| Data Filename | JKR-ED-101ZD.d | ACQ Method  | Pondicherry Universi | Comment         | ED-JKR-535.07 | Acquired Time          | 22-05-2018 14:14:52 |

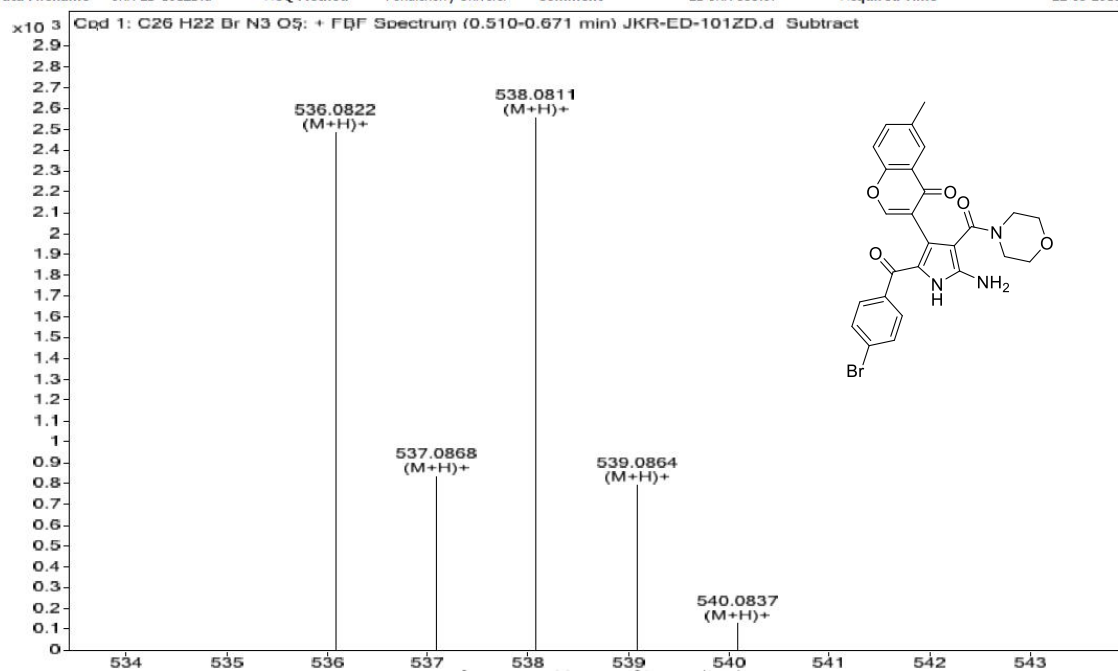

HRMS (ESI) spectrum of **8d**

JKR-ED-101-ZG  
PROTON DMSO {D:\JKR} KOPAL 1

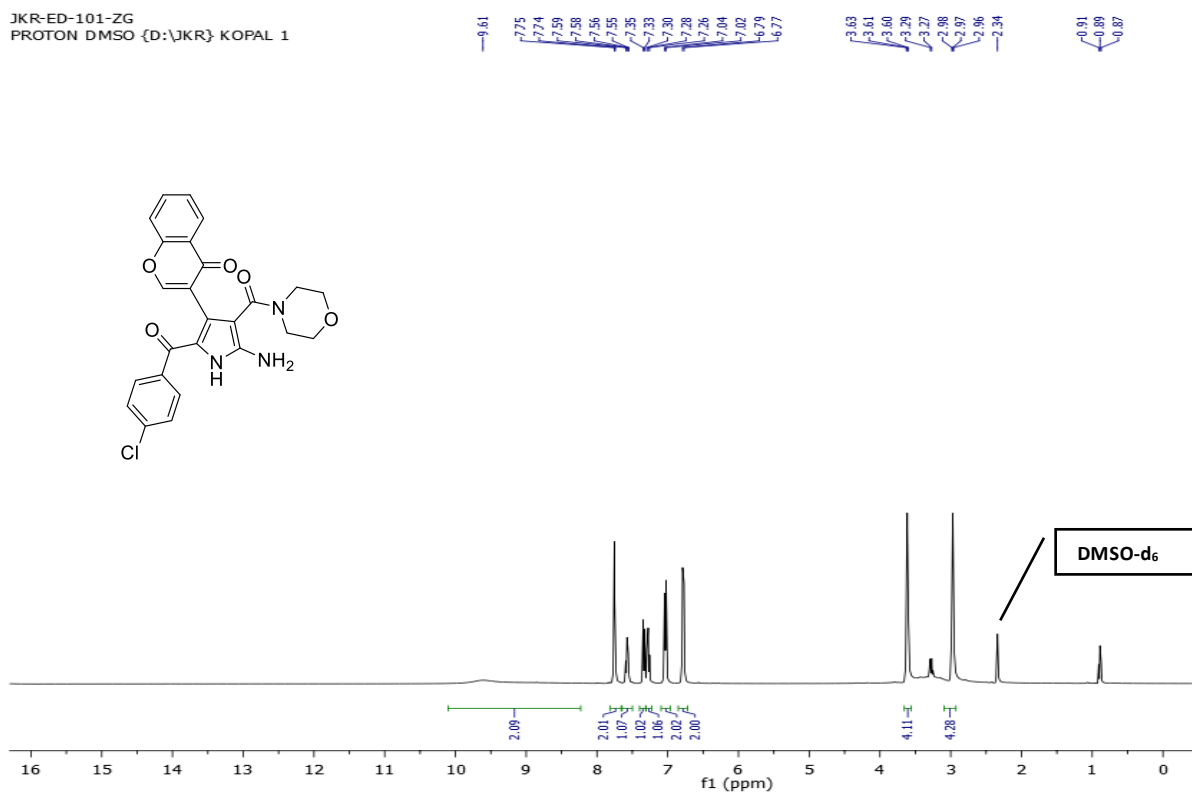

<sup>1</sup>H NMR spectrum of **8e** (400 MHz, DMSO-*d*<sub>6</sub>)

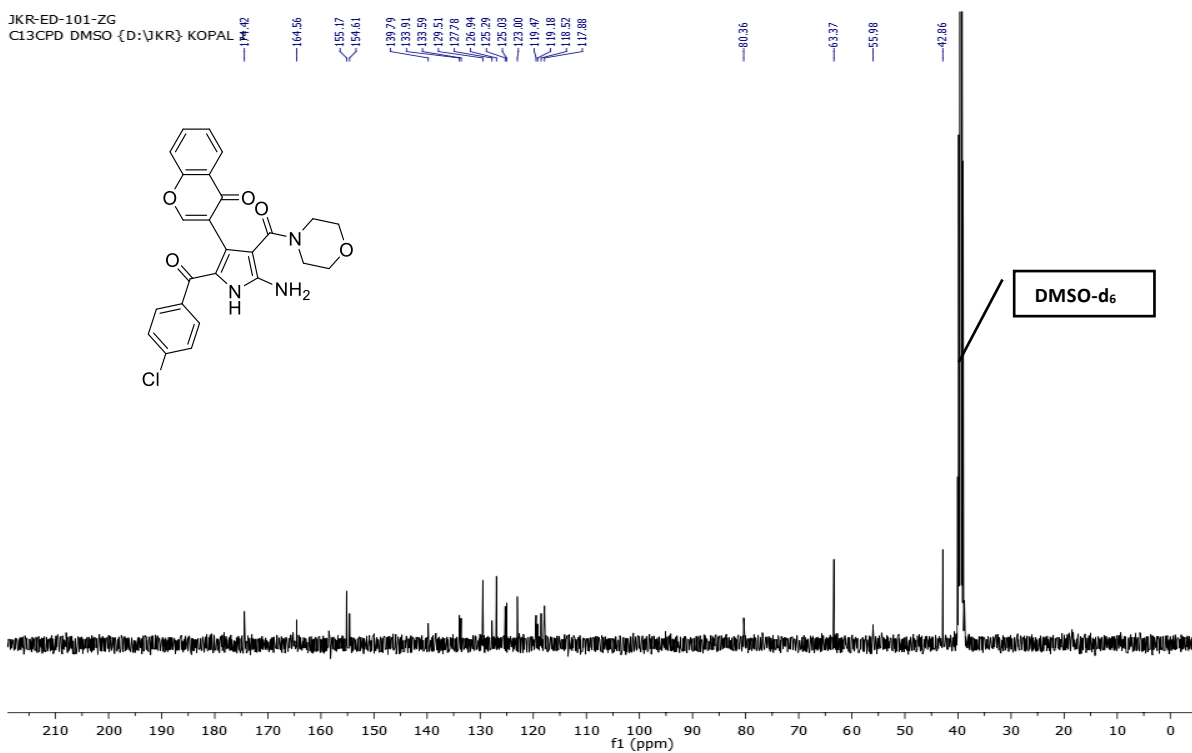

<sup>13</sup>C{<sup>1</sup>H} NMR spectrum of **8e** (100 MHz, DMSO-*d*<sub>6</sub>)



| Sample Name   | JKR-ED-101ZG    | Position    |                      | Instrument Name | Q-TOF           | User Name              | QTOF-PU\admin       |
|---------------|-----------------|-------------|----------------------|-----------------|-----------------|------------------------|---------------------|
| Inj Vol       | -1              | InjPosition |                      | SampleType      | Sample          | IRM Calibration Status | Success             |
| Data Filename | JKR-ED-101ZG2.d | ACQ Method  | Pondicherry Universi | Comment         | ED-JKR-477.1091 | Acquired Time          | 23-05-2018 12:29:19 |

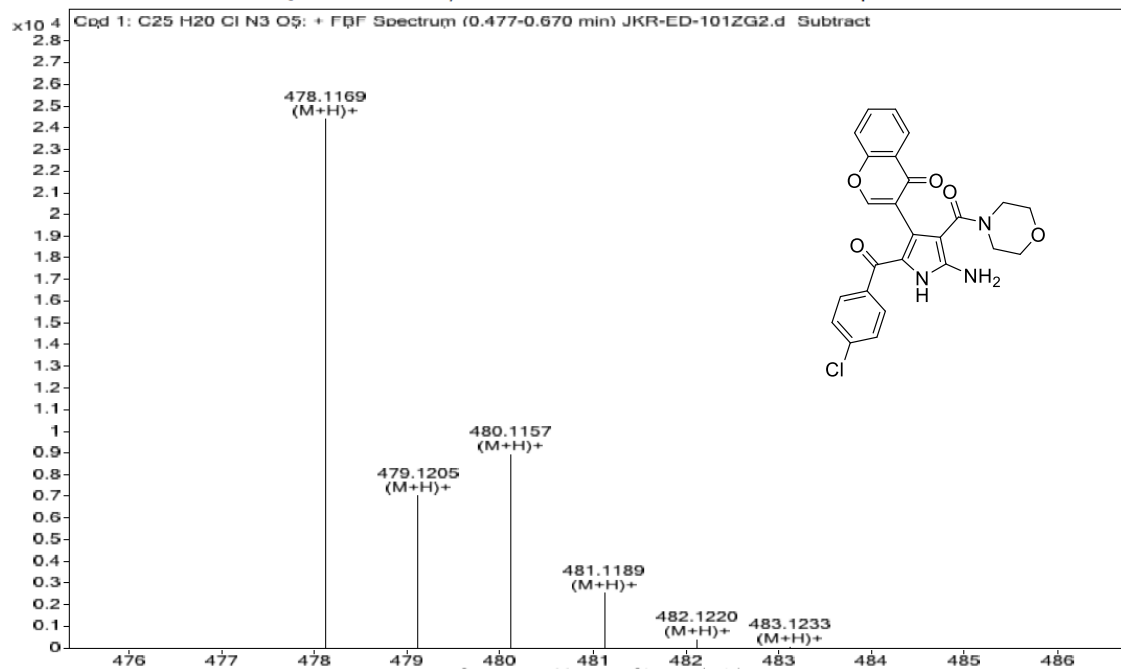

HRMS (ESI) spectrum of **8e**

JKR-ED-101ZH  
PROTON DMSO {D:\JKR} KOPAL 1

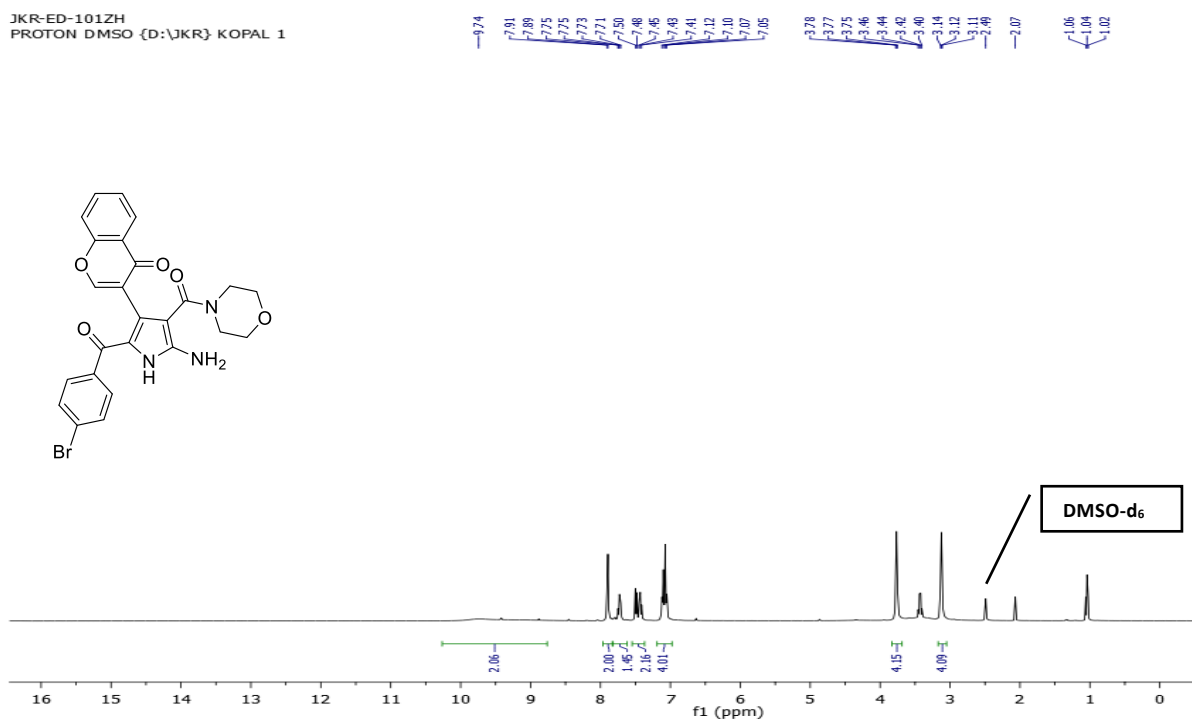

<sup>1</sup>H NMR spectrum of **8f** (400 MHz, DMSO-*d*<sub>6</sub>)

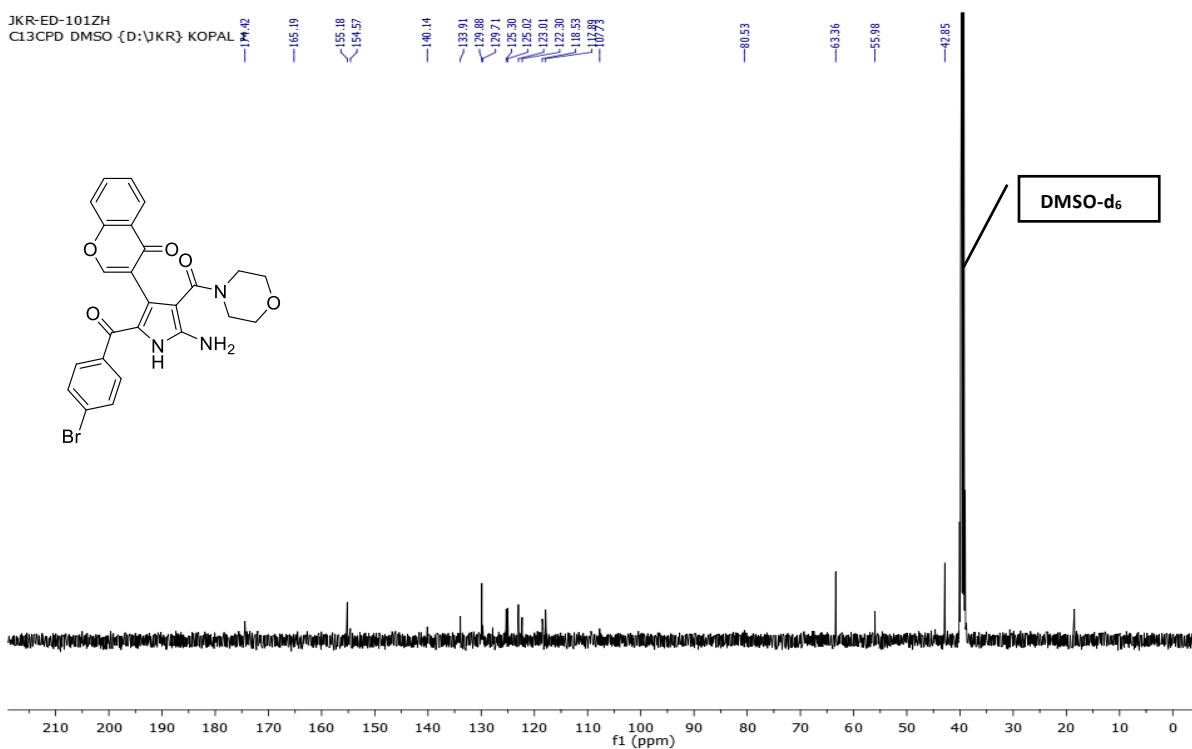

<sup>13</sup>C{<sup>1</sup>H} NMR spectrum of **8f** (100 MHz, DMSO-*d*<sub>6</sub>)

|               |                 |             |                      |                 |                 |                        |                     |
|---------------|-----------------|-------------|----------------------|-----------------|-----------------|------------------------|---------------------|
| Sample Name   | JKR-ED-101ZH    | Position    |                      | Instrument Name | Q-TOF           | User Name              | QTOF-PU\admin       |
| Inj Vol       | -1              | InjPosition |                      | SampleType      | Sample          | IRM Calibration Status | Success             |
| Data Filename | JKR-ED-101ZH1.d | ACQ Method  | Pondicherry Universi | Comment         | ED-JKR-521.0586 | Acquired Time          | 23-05-2018 12:35:41 |

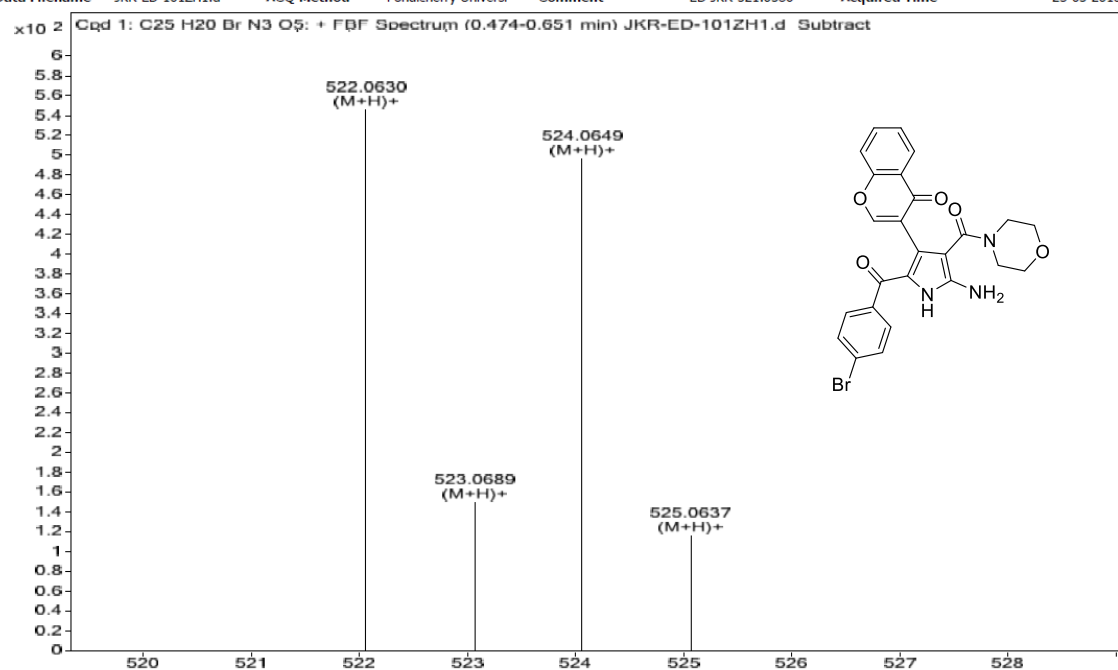

HRMS (ESI) spectrum of **8f**

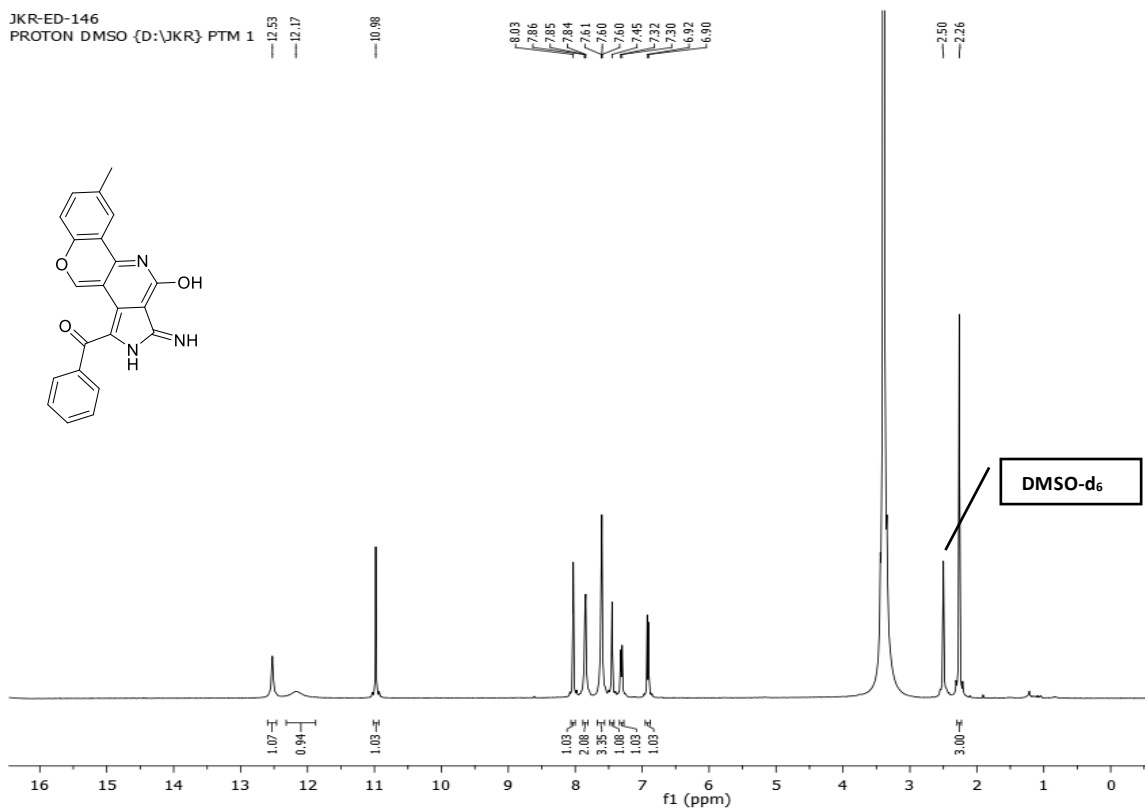

$^1\text{H}$  NMR spectrum of **10a** (400 MHz, DMSO- $d_6$ )

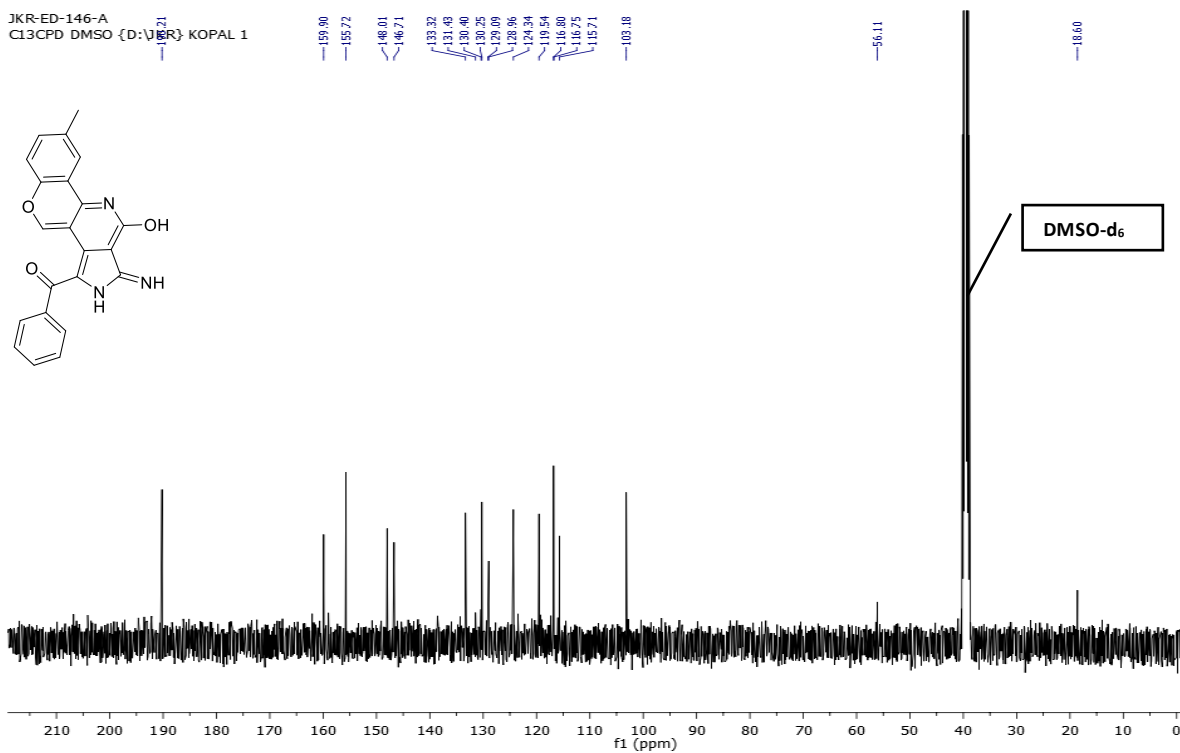

$^{13}\text{C}\{^1\text{H}\}$  NMR spectrum of **10a** (100 MHz, DMSO- $d_6$ )

| Sample Name   | JKR-ED-146   | Position    | Instrument Name      | Q-TOF   | User Name              | QTOF-PU\admin |                     |
|---------------|--------------|-------------|----------------------|---------|------------------------|---------------|---------------------|
| Inj Vol       | -1           | InjPosition | SampleType           | Sample  | IRM Calibration Status | Success       |                     |
| Data Filename | JKR-ED-146.d | ACQ Method  | Pondicherry Universi | Comment | ED-JKR-387.1219        | Acquired Time | 20-08-2018 11:53:39 |

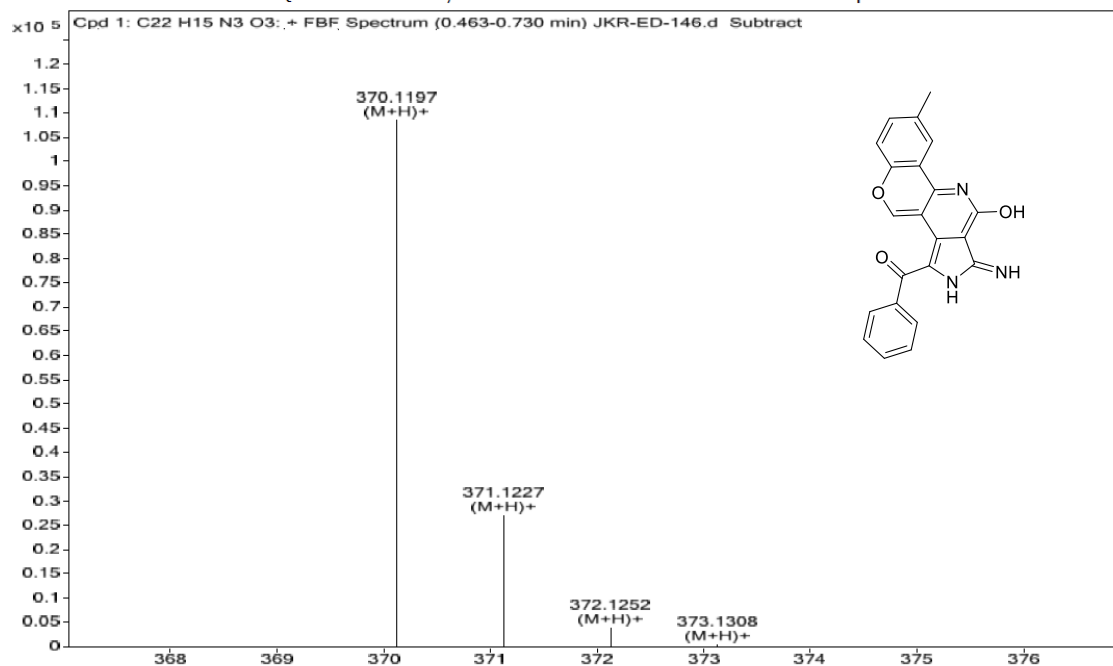

HRMS (ESI) spectrum of **10a**

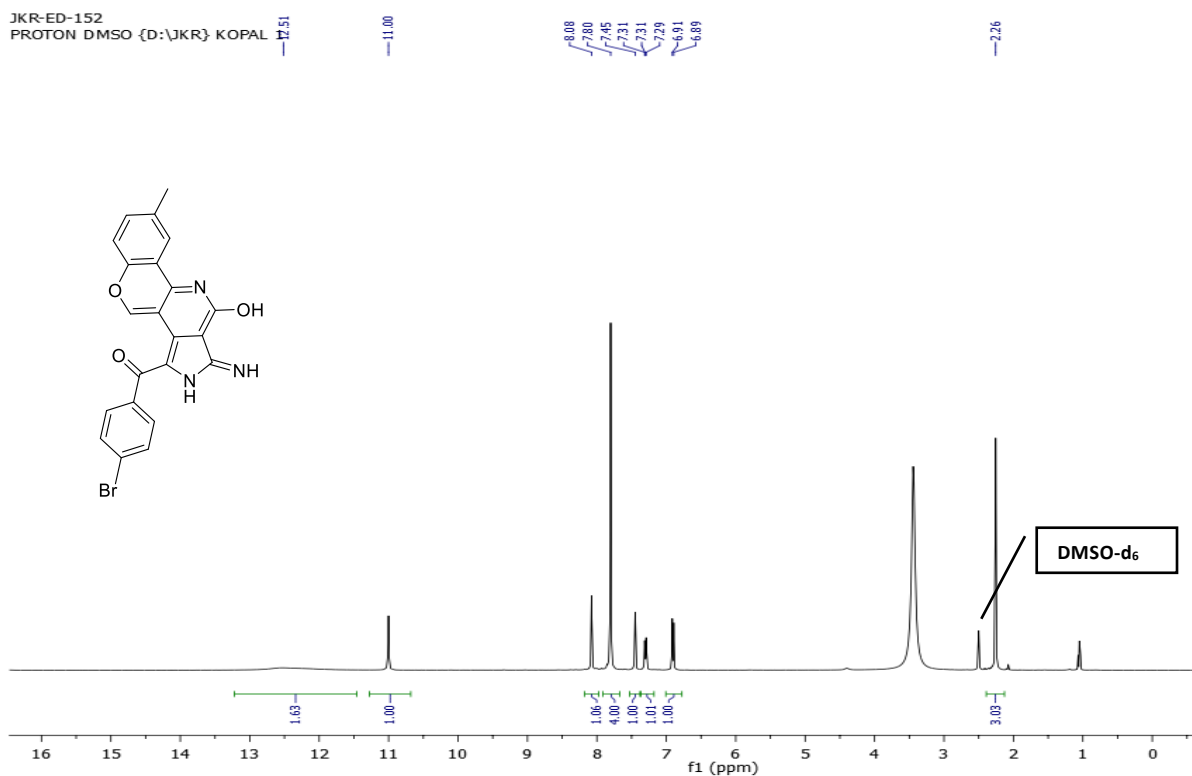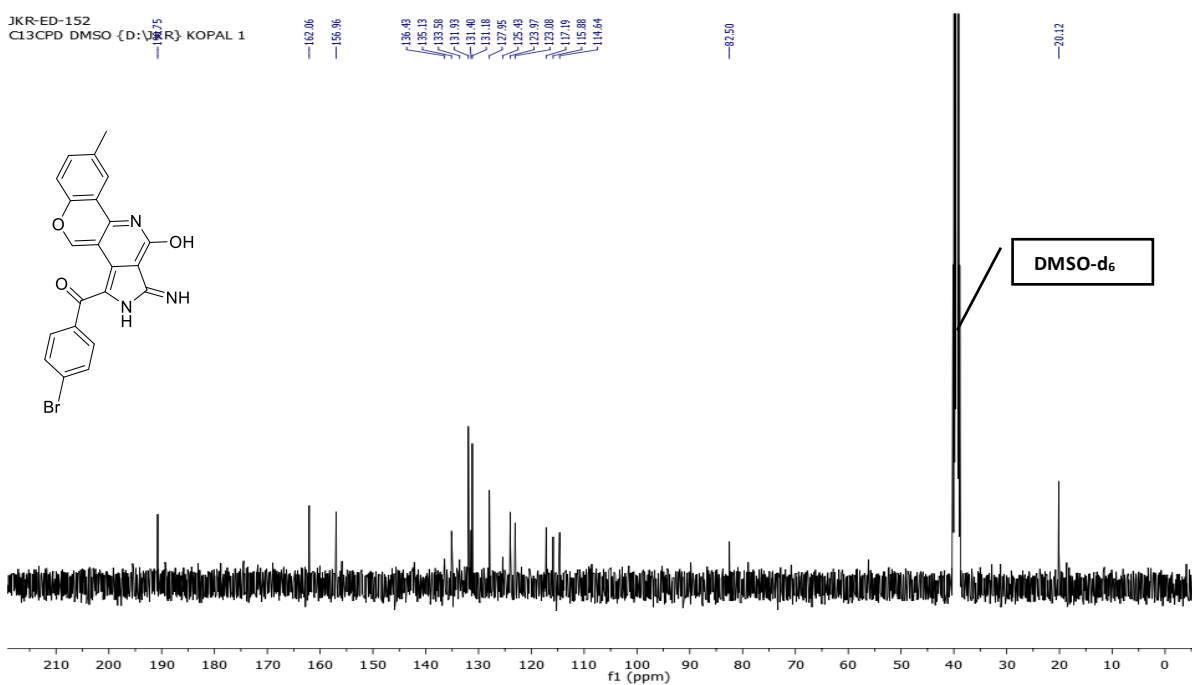

JKR-ED-152  
C13DEPT135 DMSO {D-;JKR} KOPAL 1

134.96  
131.77  
131.24  
131.02

117.03

19.96

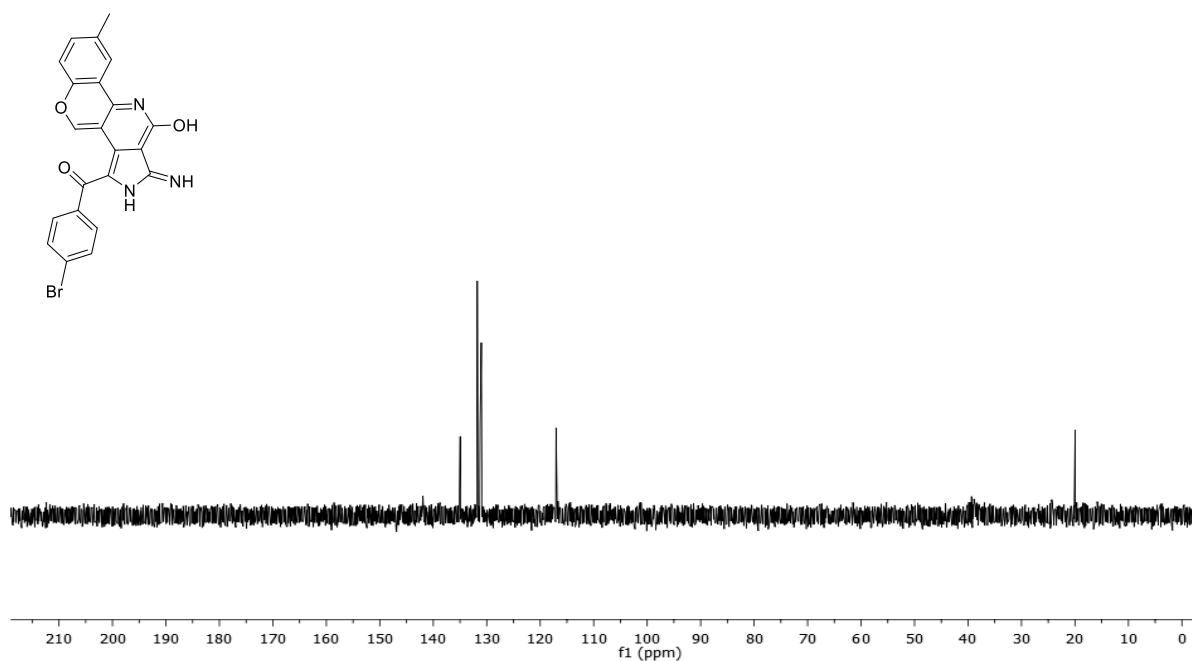

DEPT 135 NMR spectrum of **10b** (100 MHz, DMSO- $d_6$ )

| Sample Name   | Position   | Instrument Name | Q-TOF   | User Name              | QTOF-PU\admin       |
|---------------|------------|-----------------|---------|------------------------|---------------------|
| JKR-ED-152    | -1         | Sample          | Sample  | IRM Calibration Status | Success             |
| Data Filename | ACQ Method | SampleType      | Comment | Acquired Time          | 24-09-2018 12:22:03 |

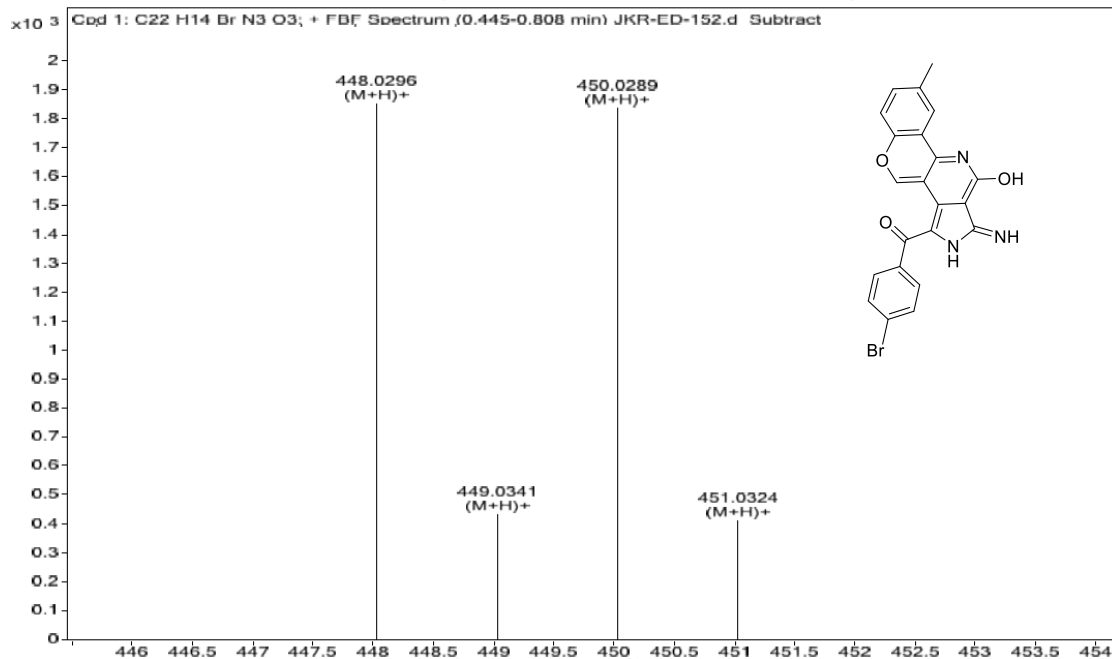

HRMS (ESI) spectrum of **10b**

JKR-ED-148  
PROTON CDCl<sub>3</sub> {D:\JKR} KOPAL 1

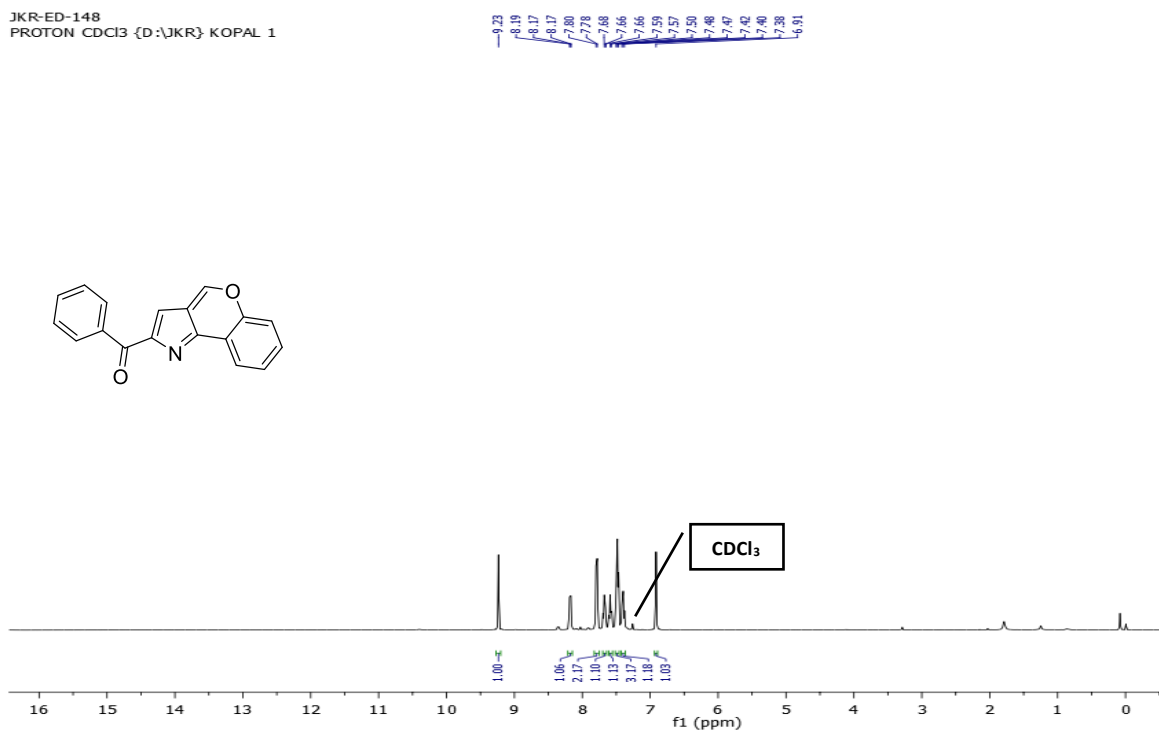

<sup>1</sup>H NMR spectrum of **12a** (400 MHz, CDCl<sub>3</sub>)

JKR-ED-148  
C13CPD CDCl<sub>3</sub> {D:\JKR} KOPAL 1

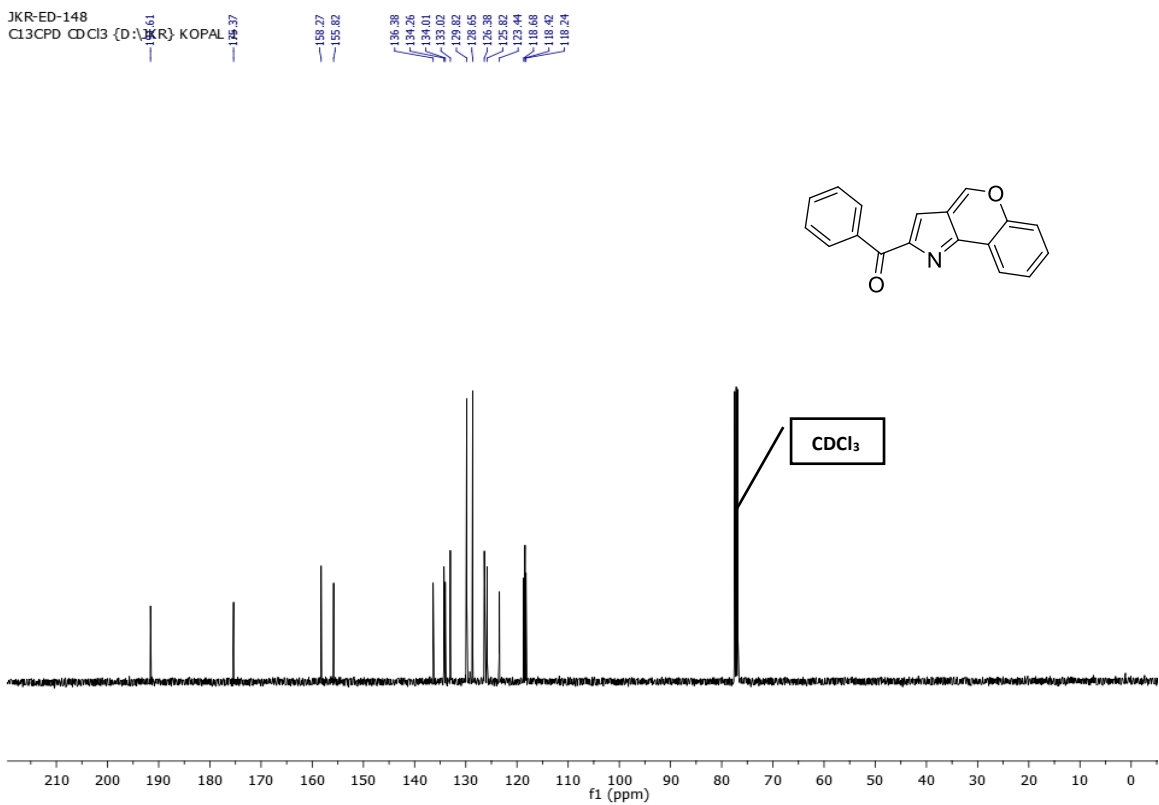

<sup>13</sup>C{<sup>1</sup>H} NMR spectrum of **12a** (100 MHz, CDCl<sub>3</sub>)



JKR-ED-148  
 Cl3DEPT135 CDCl3 {D:\JKR} KOPAL 1

158.18  
 134.17  
 132.93  
 129.73  
 128.57  
 126.30  
 125.73  
 118.34  
 118.16

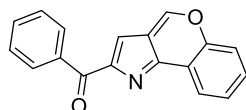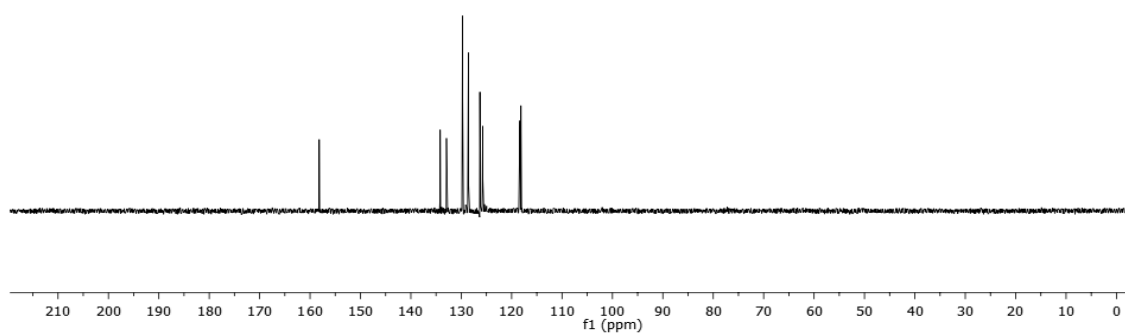

DEPT 135 NMR spectrum of **12a** (100 MHz, CDCl<sub>3</sub>)

| Sample Name   | Position             | Instrument Name | User Name              |
|---------------|----------------------|-----------------|------------------------|
| JKR-ED-148RE  | JKR-ED-148RE         | Q-TOF           | QTOF-PU\admin          |
| Inj Vol       | -1                   | Sample          | IRM Calibration Status |
| Data Filename | JKR-ED-148RE.d       | Comment         | Acquired Time          |
|               | Pondicherry Universi | ED-JKR-273.0790 | Success                |
|               |                      |                 | 26-09-2018 12:07:17    |

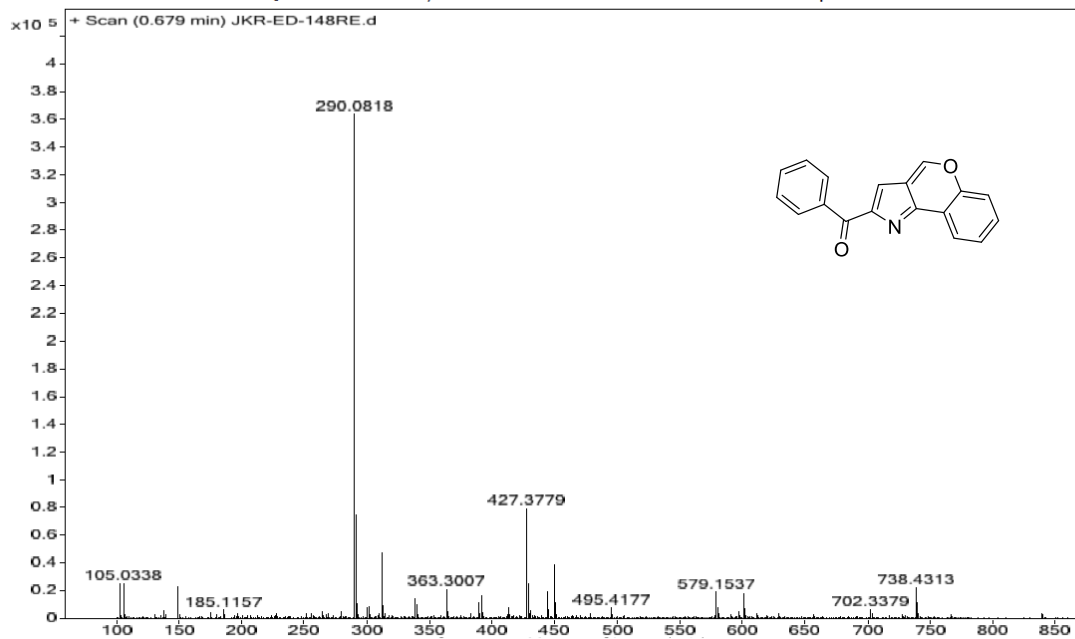

HRMS (ESI) spectrum of **12a**

JKR-ED-148E  
PROTON CDCl<sub>3</sub> {D:\JKR} KOPAL 1

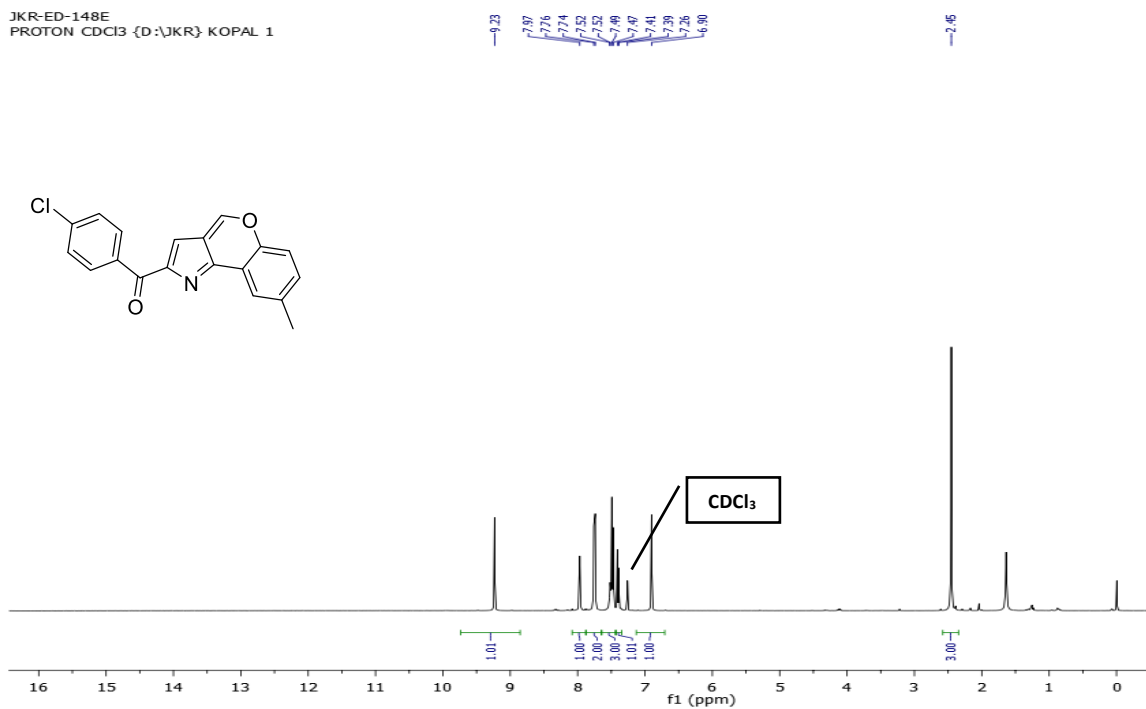

<sup>1</sup>H NMR spectrum of **12b** (400 MHz, CDCl<sub>3</sub>)

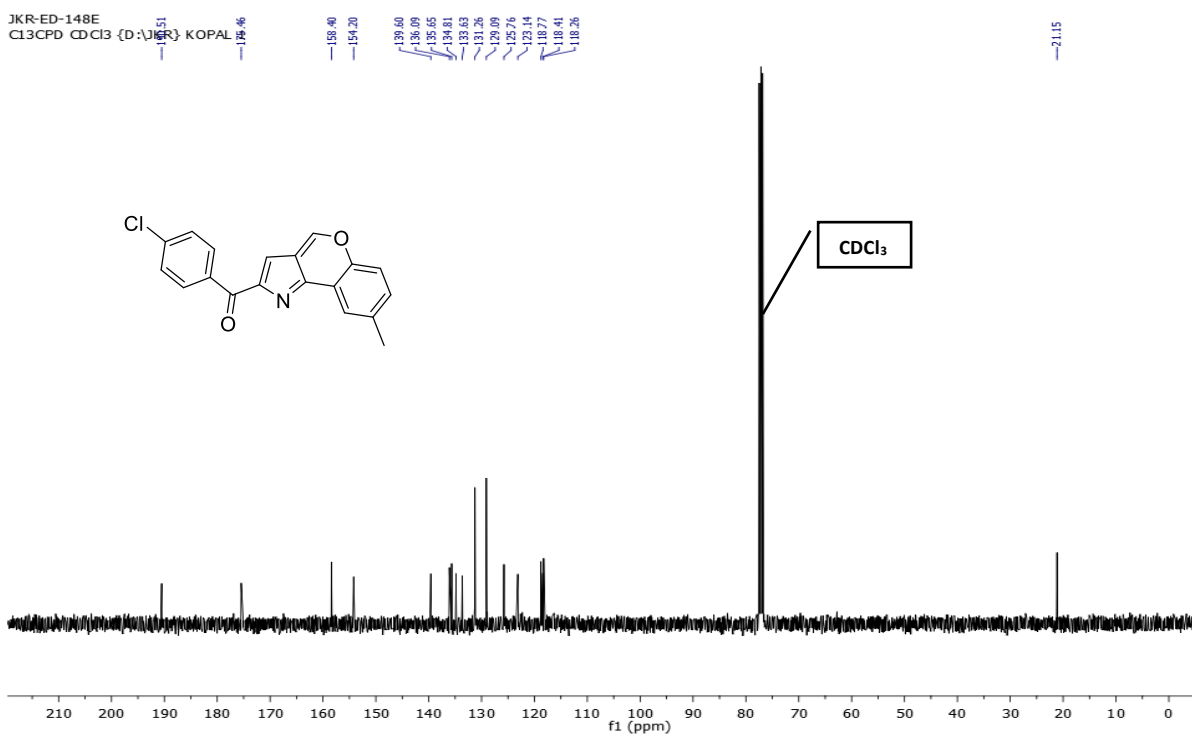

<sup>13</sup>C{<sup>1</sup>H} NMR spectrum of **12b** (100 MHz, CDCl<sub>3</sub>)

JKR-ED-148E  
Cl3DEPT135 CDCl3 {D:\JKR} KOPAL 1

158.26

135.51  
131.12  
128.86  
125.63  
118.63  
118.12

21.01

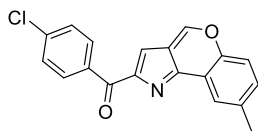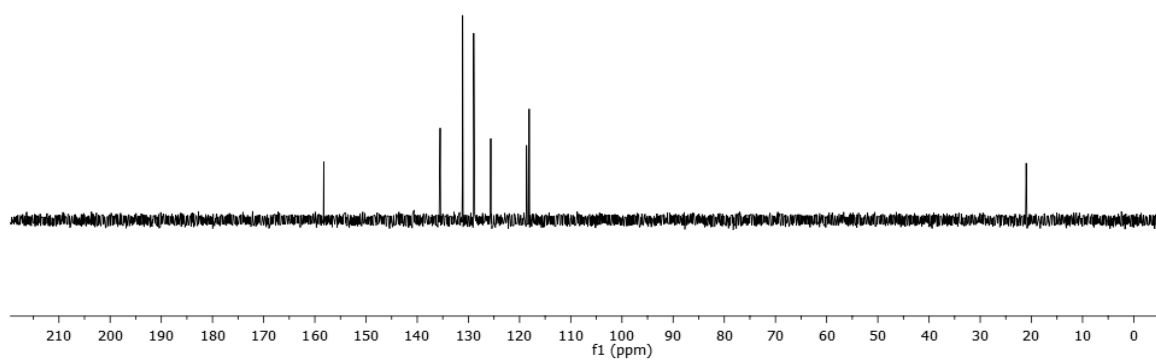

DEPT 135 NMR spectrum of **12b** (100 MHz, CDCl<sub>3</sub>)

| Sample Name   | JKR-ED-148E   | Position    | Instrument Name | Q-TOF           | User Name              | QTOF-PU\admin       |
|---------------|---------------|-------------|-----------------|-----------------|------------------------|---------------------|
| Inj Vol       | -1            | InjPosition | SampleType      | Sample          | IRM Calibration Status | Success             |
| Data Filename | JKR-ED-148E.d | ACQ Method  | Comment         | ED-JKR-307.0400 | Acquired Time          | 03-10-2018 14:58:17 |

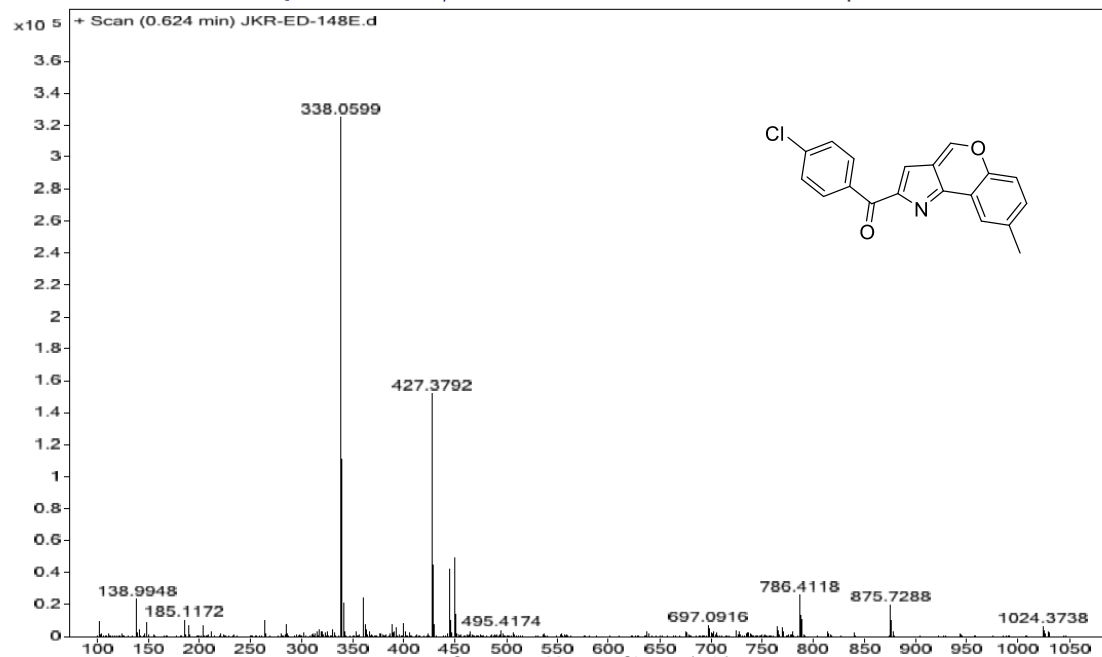

HRMS (ESI) spectrum of **12b**

JKR-ED-148D  
PROTON CDCl3 {D:\JKR} KOPAL 1

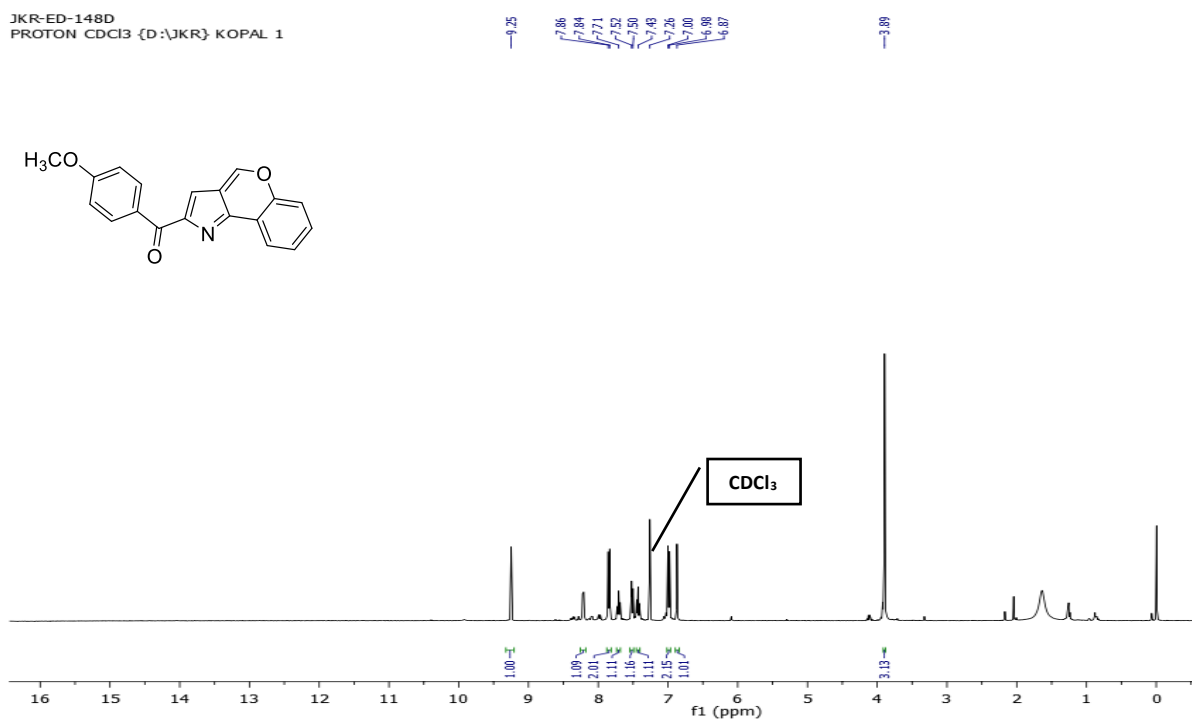

<sup>1</sup>H NMR spectrum of **12c** (400 MHz, CDCl<sub>3</sub>)

JKR-ED-148D  
C13CPD CDCl3 {D:\JKR} KOPAL

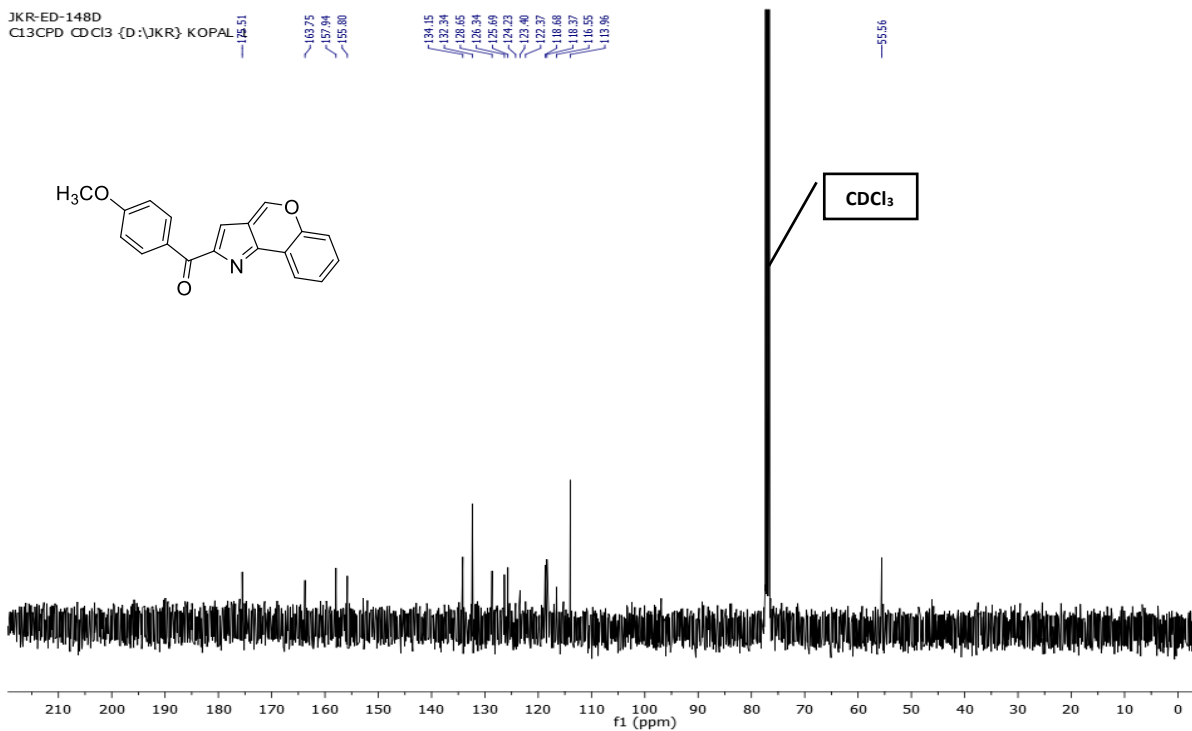

<sup>13</sup>C{<sup>1</sup>H} NMR spectrum of **12c** (100 MHz, CDCl<sub>3</sub>)

JKR-ED-148D  
Cl3DEPT135 CDCl3 {D:\JKR} KOPAL 1

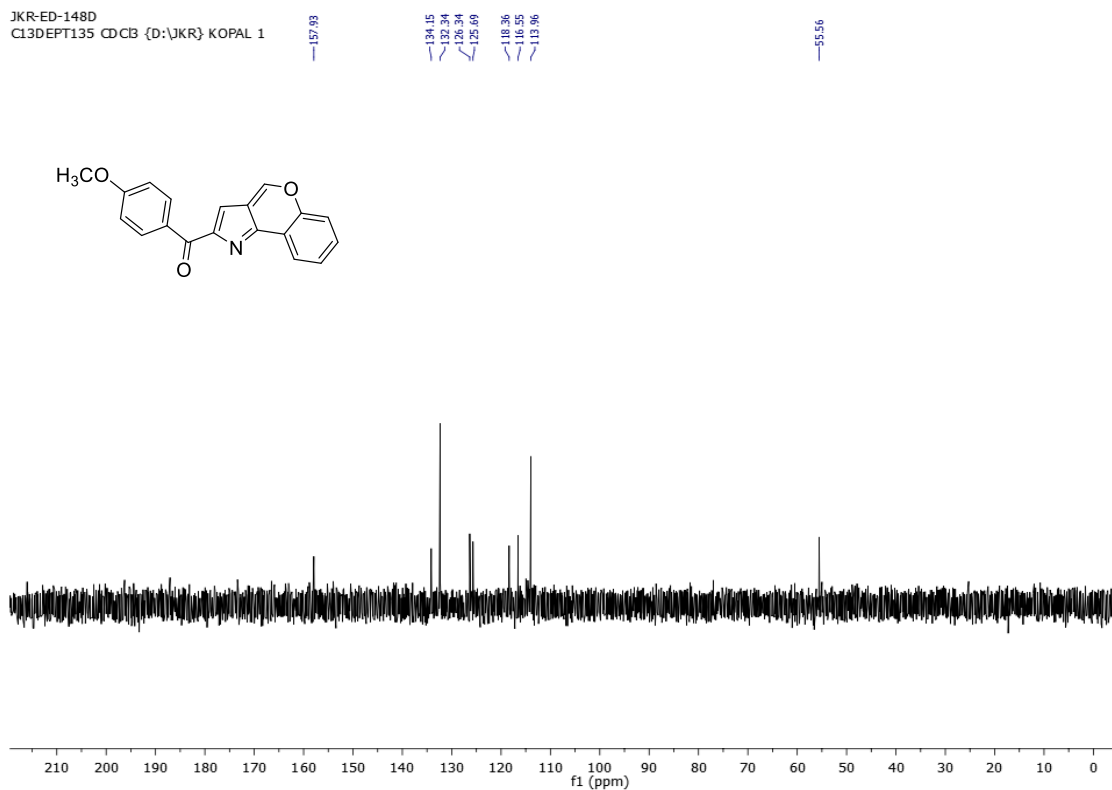

DEPT 135 NMR spectrum of **12c** (100 MHz, CDCl<sub>3</sub>)

| Sample Name   | JKR-ED-148DRE   | Position    | Instrument Name | Q-TOF           | User Name              | QTOF-PU\admin       |
|---------------|-----------------|-------------|-----------------|-----------------|------------------------|---------------------|
| Inj Vol       | -1              | InjPosition | SampleType      | Sample          | IRM Calibration Status | Success             |
| Data Filename | JKR-ED-148DRE.d | ACQ Method  | Comment         | ED-JKR-303.0895 | Acquired Time          | 26-09-2018 12:03:40 |

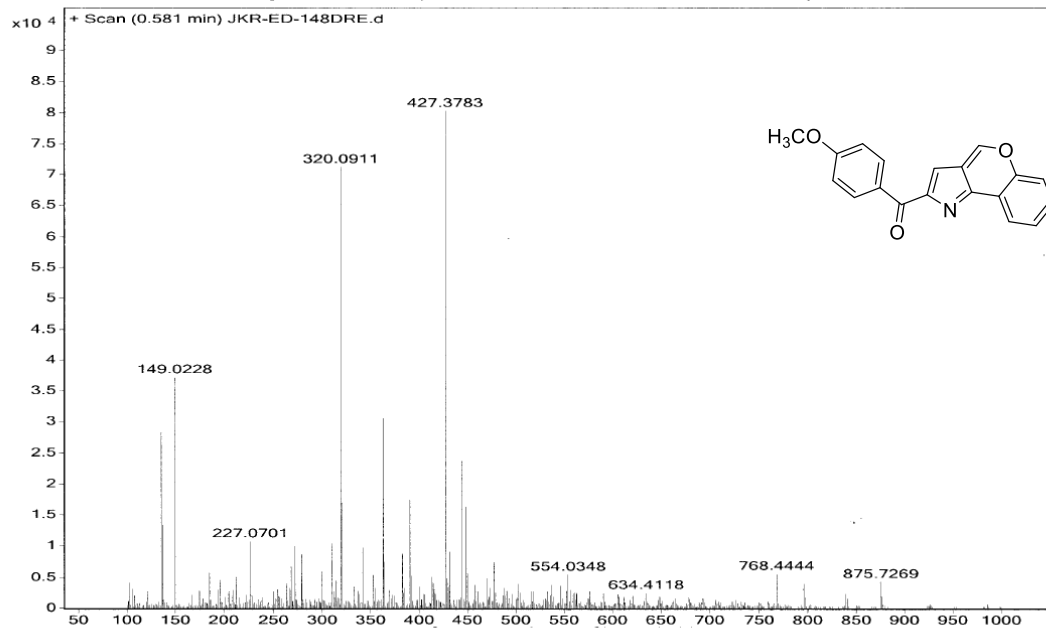

HRMS (ESI) spectrum of **12c**

JKR-ED-157  
PROTON CDCl<sub>3</sub> {D:\JKR} KOPAL 1

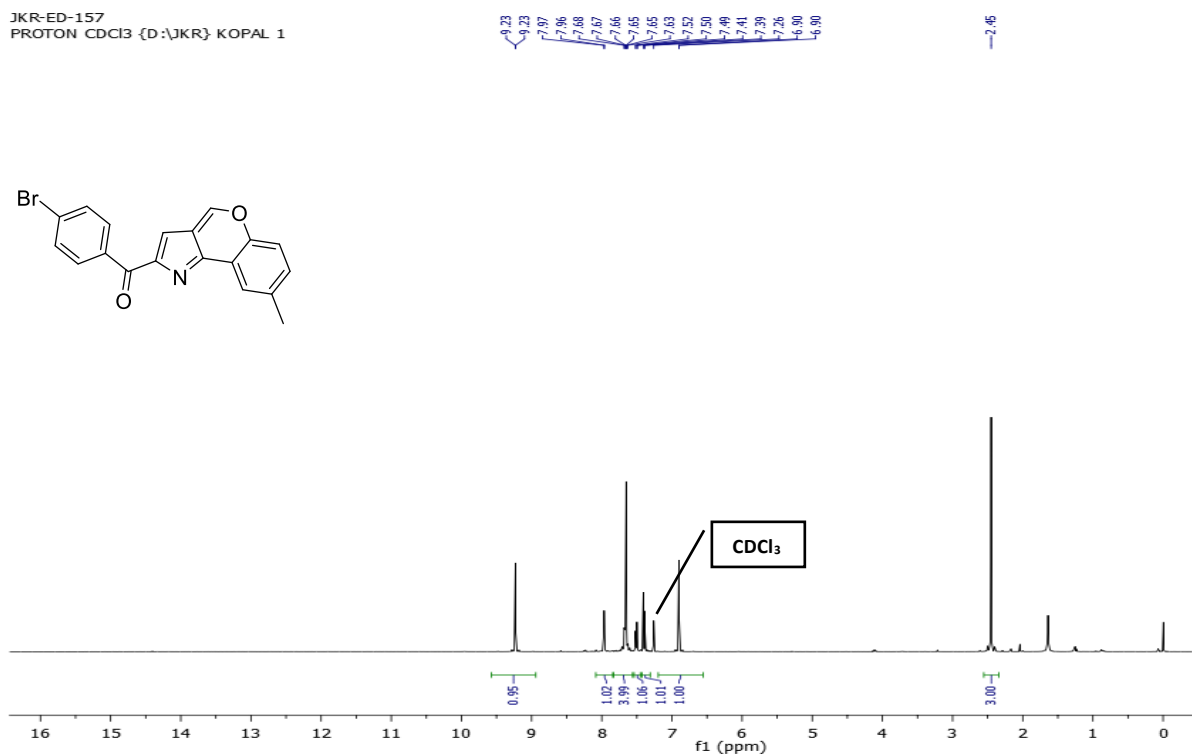

<sup>1</sup>H NMR spectrum of **12d** (400 MHz, CDCl<sub>3</sub>)

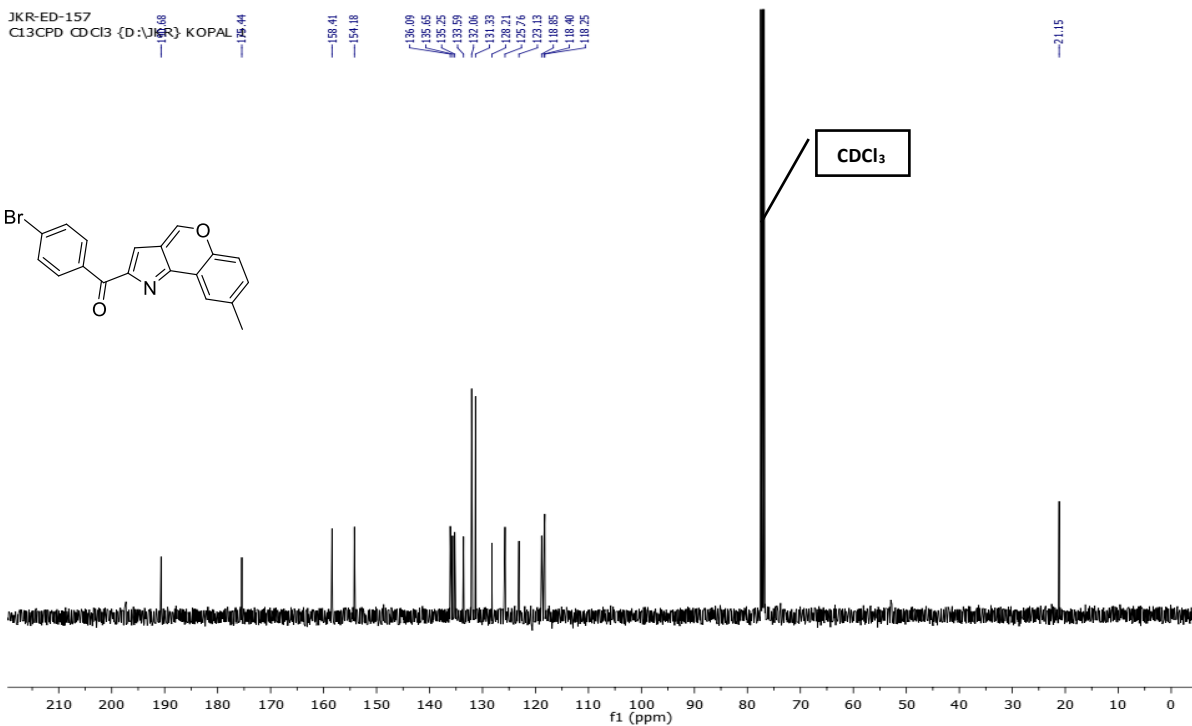

<sup>13</sup>C{<sup>1</sup>H} NMR spectrum of **12d** (100 MHz, CDCl<sub>3</sub>)

JKR-ED-157  
Cl3DEPT135 CDCl3 {D:\JKR\ KOPAL 1

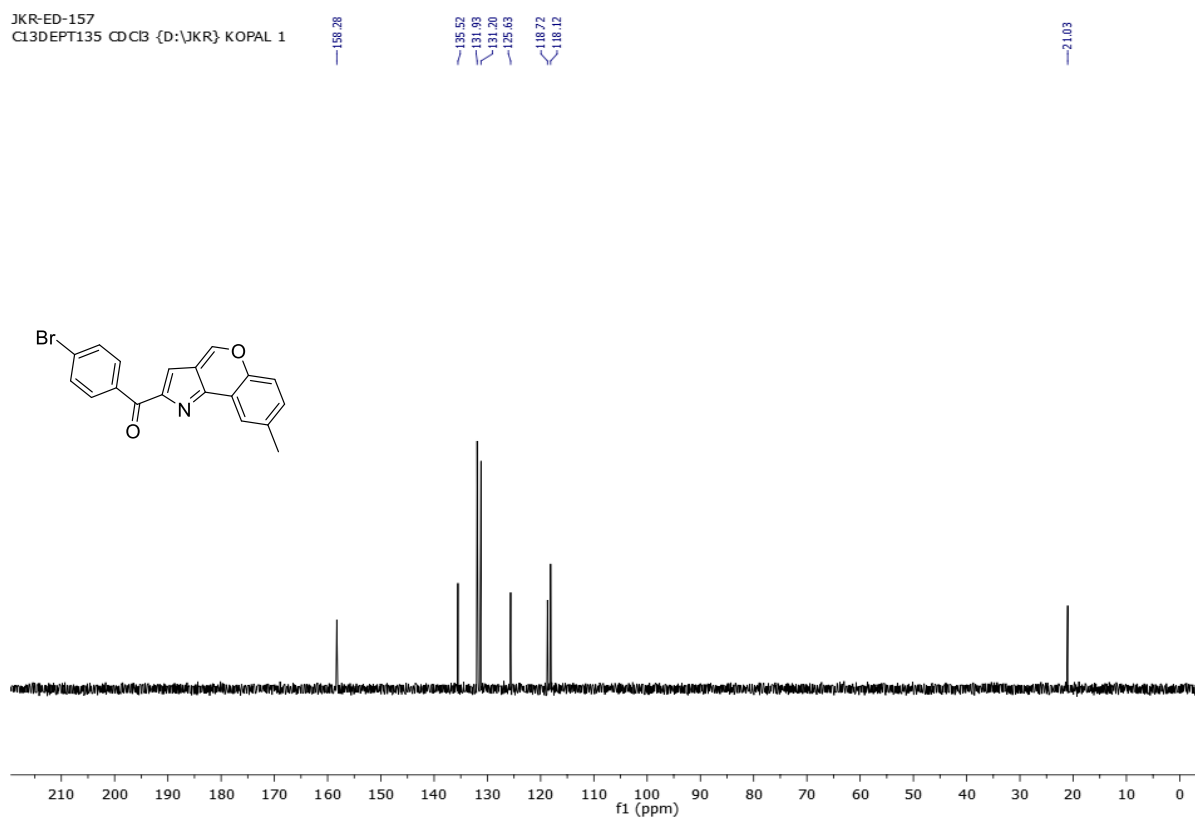

DEPT 135 NMR spectrum of **12d** (100 MHz, CDCl<sub>3</sub>)

JKR-ED-101-Z  
PROTON DMSO {D:\JKR} KOPAL 1

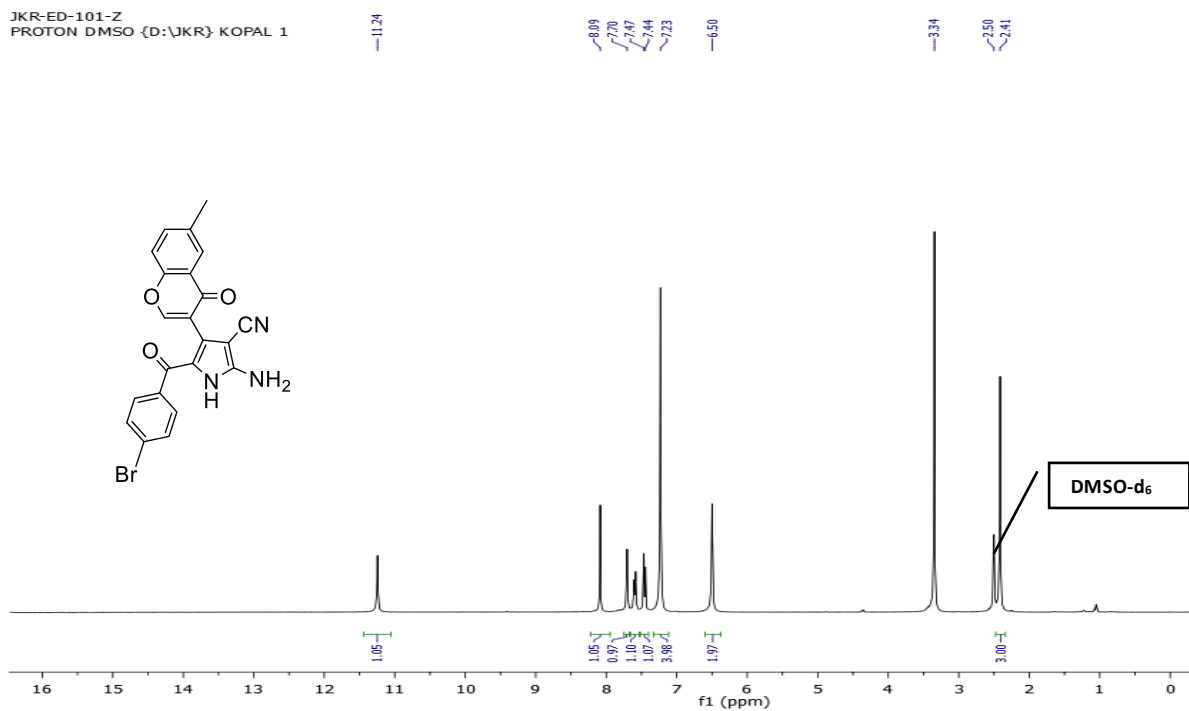

$^1\text{H}$  NMR spectrum of **15a** (400 MHz,  $\text{DMSO-}d_6$ )

JKR-ED-101-Z  
C13CPD DMSO {D:\JKT} KOPAL

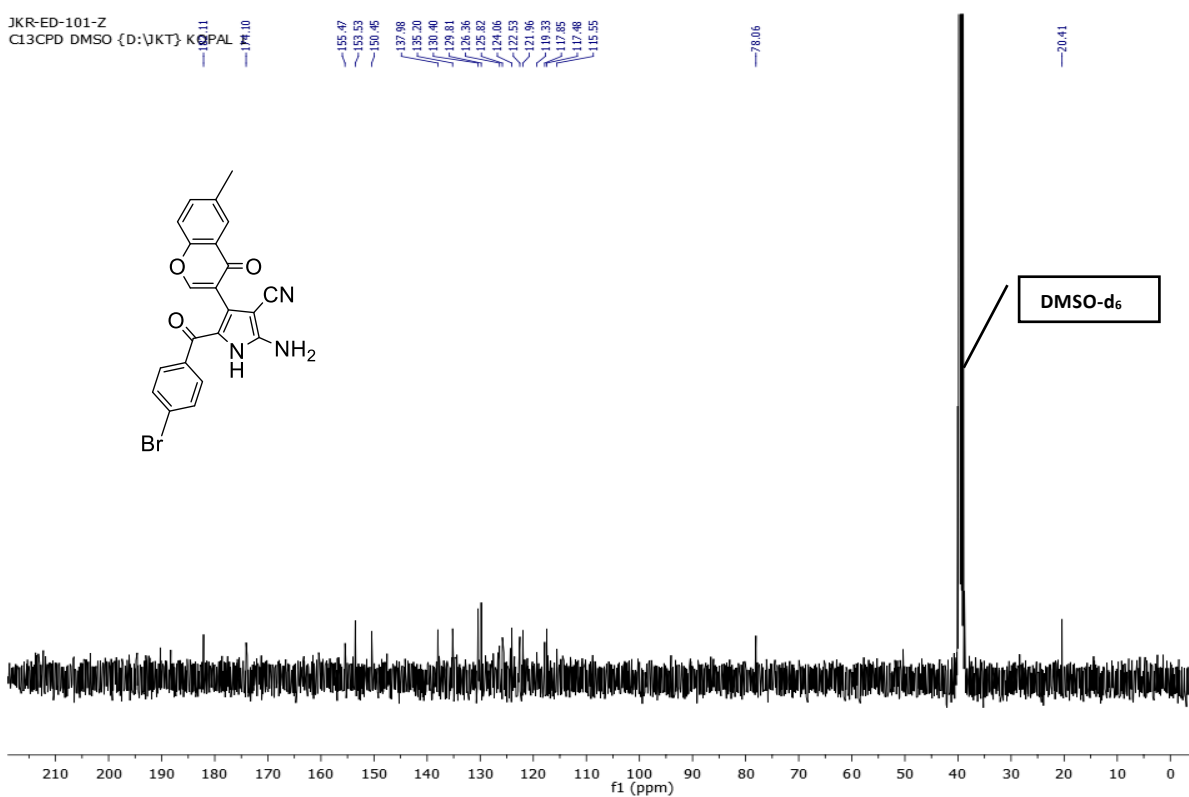

$^{13}\text{C}\{^1\text{H}\}$  NMR spectrum of **15a** (100 MHz,  $\text{DMSO-}d_6$ )



JKR-ED-101-Z  
C13DEPT135 DMSO {D:\JKT} KOPAL 1

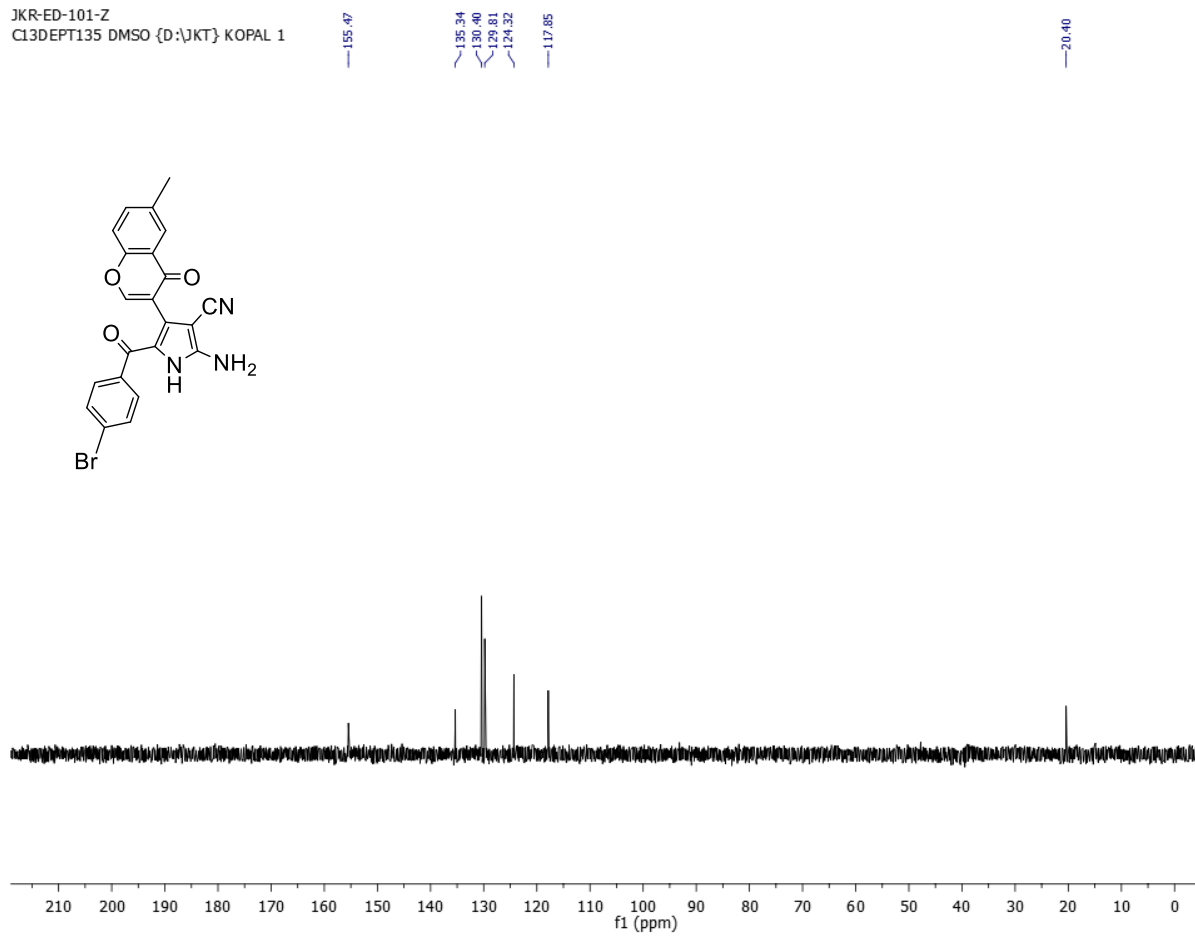

DEPT 135 NMR spectrum of **15a** (100 MHz, DMSO-*d*<sub>6</sub>)

JKR-ED-101 ZA  
PROTON DMSO {D:\JKR} KOPAL 1

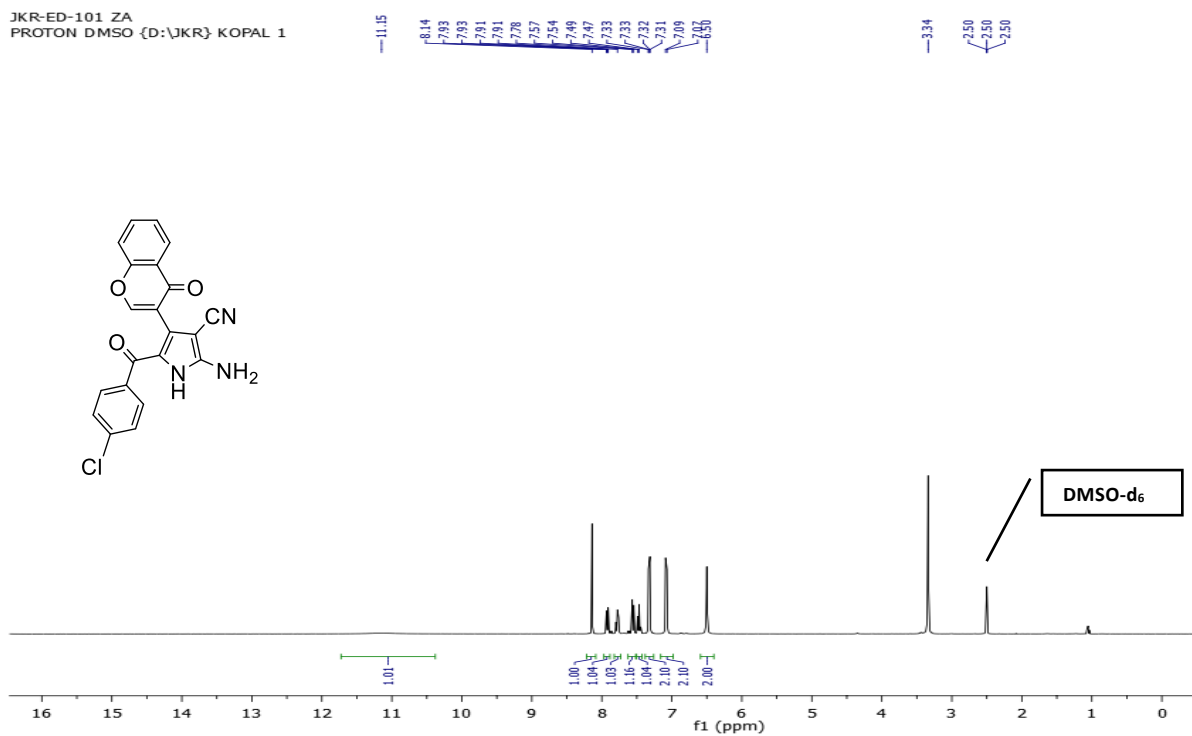

<sup>1</sup>H NMR spectrum of **15b** (400 MHz, DMSO-*d*<sub>6</sub>)

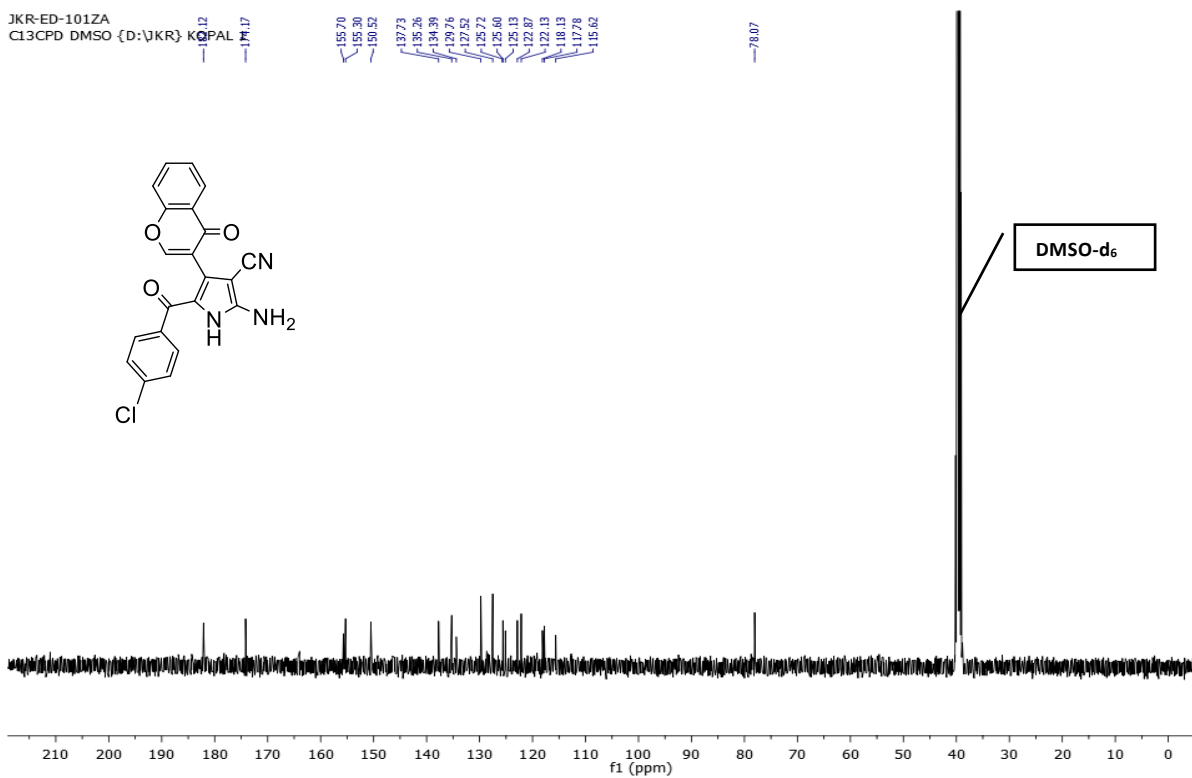

<sup>13</sup>C{<sup>1</sup>H} NMR spectrum of **15b** (100 MHz, DMSO-*d*<sub>6</sub>)

JKR-ED-101 ZA  
CL3DEPT135 DMSO {D:\JKR} KOPAL 1

155.61  
134.31  
129.86  
127.45  
125.86  
118.06

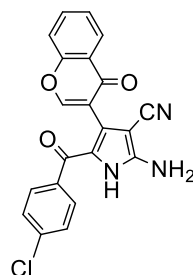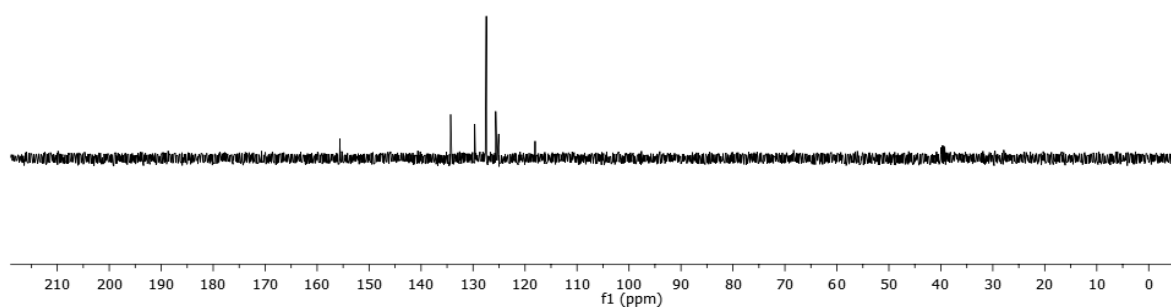

DEPT 135 NMR spectrum of **15b** (100 MHz, DMSO- $d_6$ )

| Sample Name   | JKR-ED-101ZA   | Position    |                      | Instrument Name | Q-TOF         | User Name              | QTOF-PU\admin       |
|---------------|----------------|-------------|----------------------|-----------------|---------------|------------------------|---------------------|
| Inj Vol       | -1             | InjPosition |                      | SampleType      | Sample        | IRM Calibration Status | Success             |
| Data Filename | JKR-ED-101ZA.d | ACQ Method  | Pondicherry Universi | Comment         | ED-JKR-389.06 | Acquired Time          | 16-05-2018 13:21:45 |

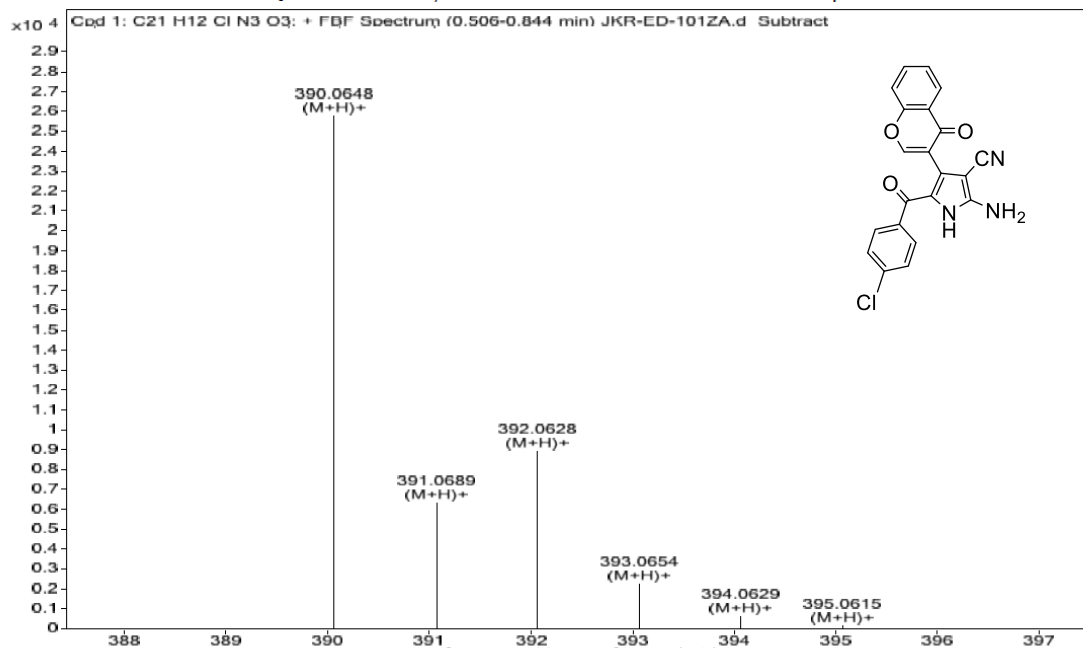

HRMS (ESI) spectrum of **15b**

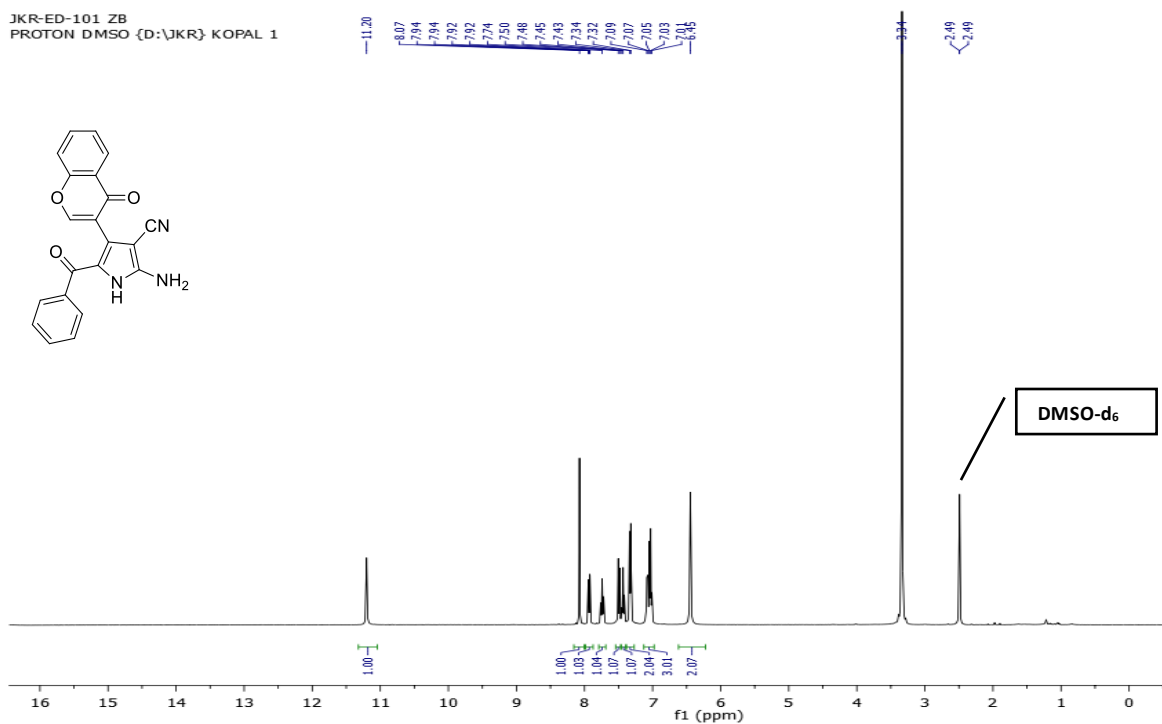

$^1\text{H}$  NMR spectrum of **15c** (400 MHz, DMSO- $d_6$ )

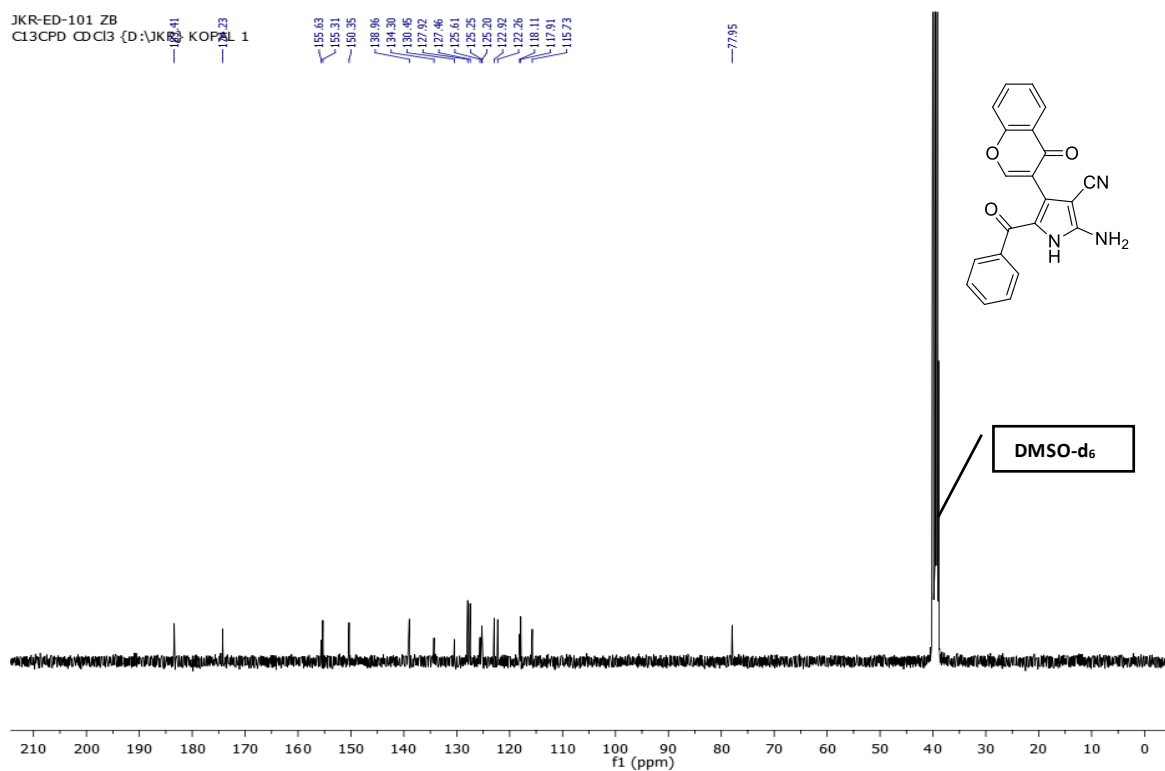

$^{13}\text{C}\{^1\text{H}\}$  NMR spectrum of **15c** (100 MHz, DMSO- $d_6$ )

JKR-ED-101 ZB  
CL3DEPT135 CD CB {D:\JKR} KOPAL 1

160.81  
136.46  
135.64  
133.10  
132.65  
130.79  
130.30  
123.30

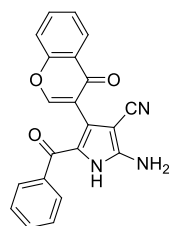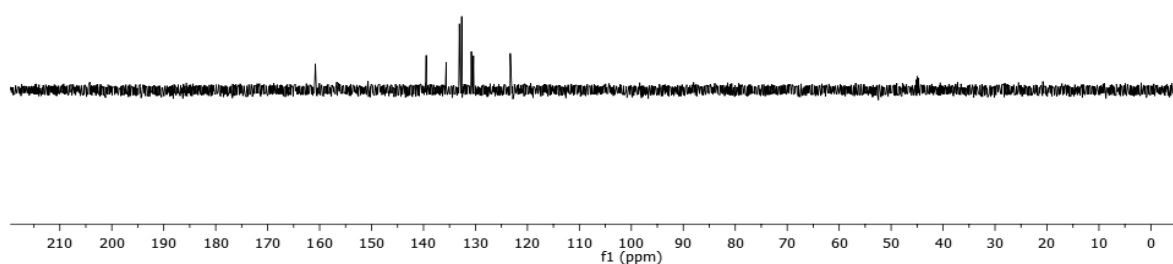

DEPT 135 NMR spectrum of **15c** (100 MHz, DMSO- $d_6$ )

| Sample Name   | JKR-ED-101ZB   | Position    |                      | Instrument Name | Q-TOF         | User Name              | QTOF-PU\admin       |
|---------------|----------------|-------------|----------------------|-----------------|---------------|------------------------|---------------------|
| Inj Vol       | -1             | InjPosition |                      | SampleType      | Sample        | IRM Calibration Status | Success             |
| Data Filename | JKR-ED-101ZB.d | ACQ Method  | Pondicherry Universi | Comment         | ED-JKR-355.10 | Acquired Time          | 16-05-2018 13:18:10 |

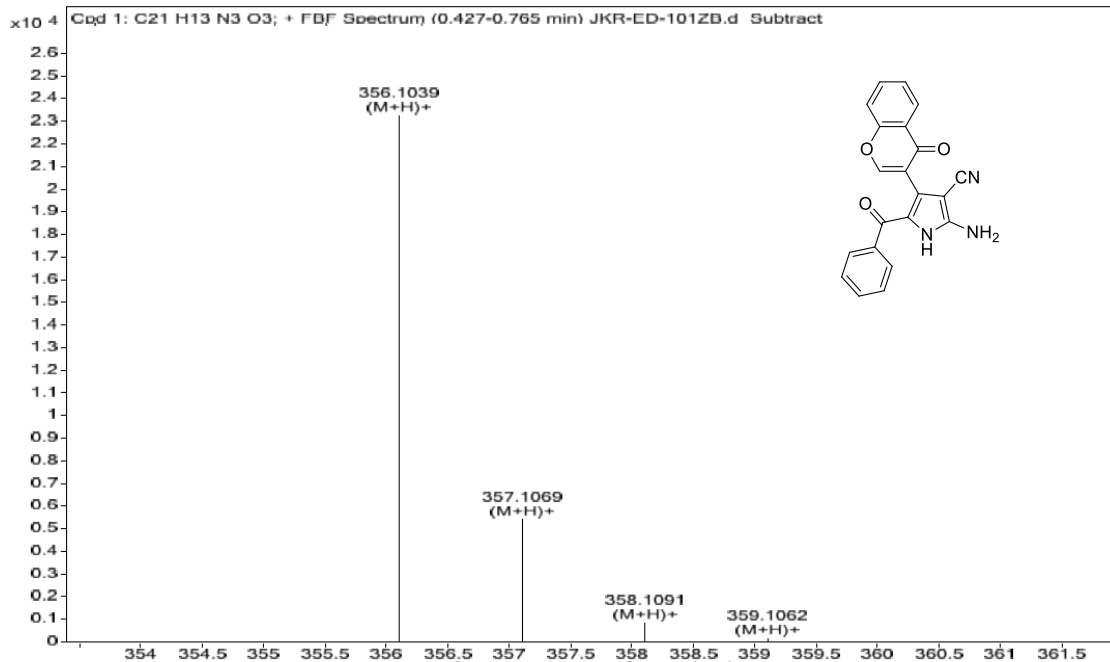

HRMS (ESI) spectrum of **15c**

JKR-ED-155  
PROTON CDCl<sub>3</sub> {D:\JKR} KOPAL 1

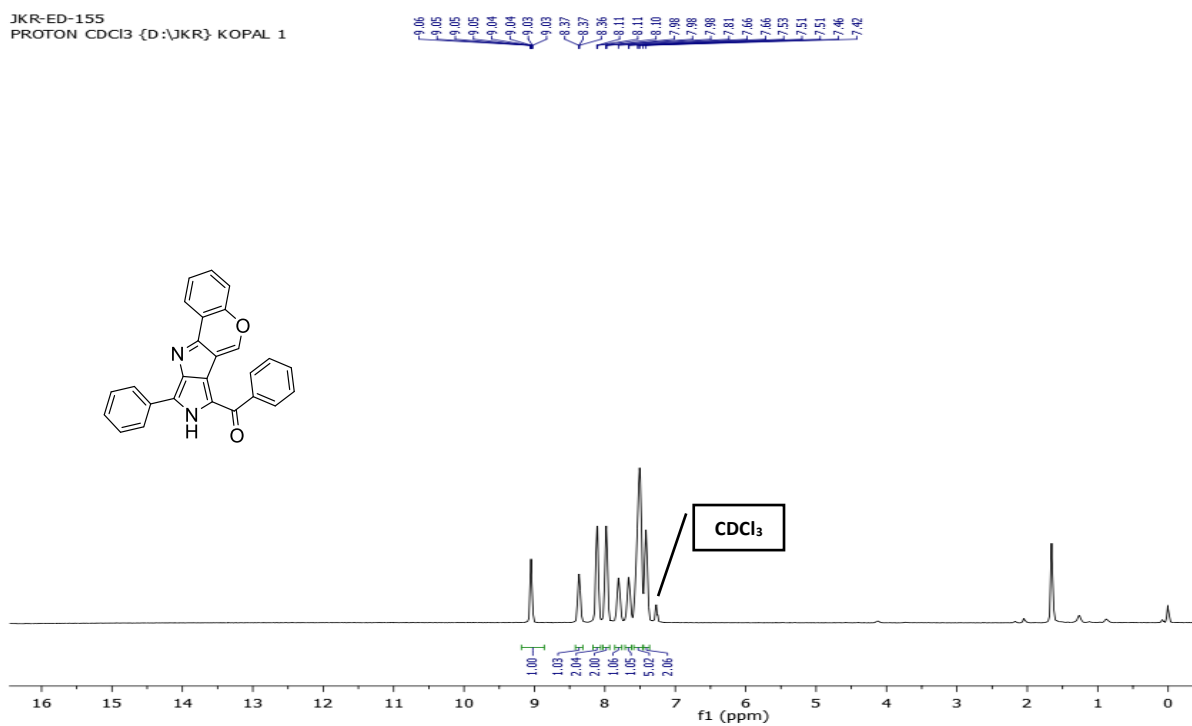

<sup>1</sup>H NMR spectrum of **17a** (400 MHz, CDCl<sub>3</sub>)

JKR-ED-155  
C13CPD CDCl<sub>3</sub> {D:\JKR} KOPAL 1

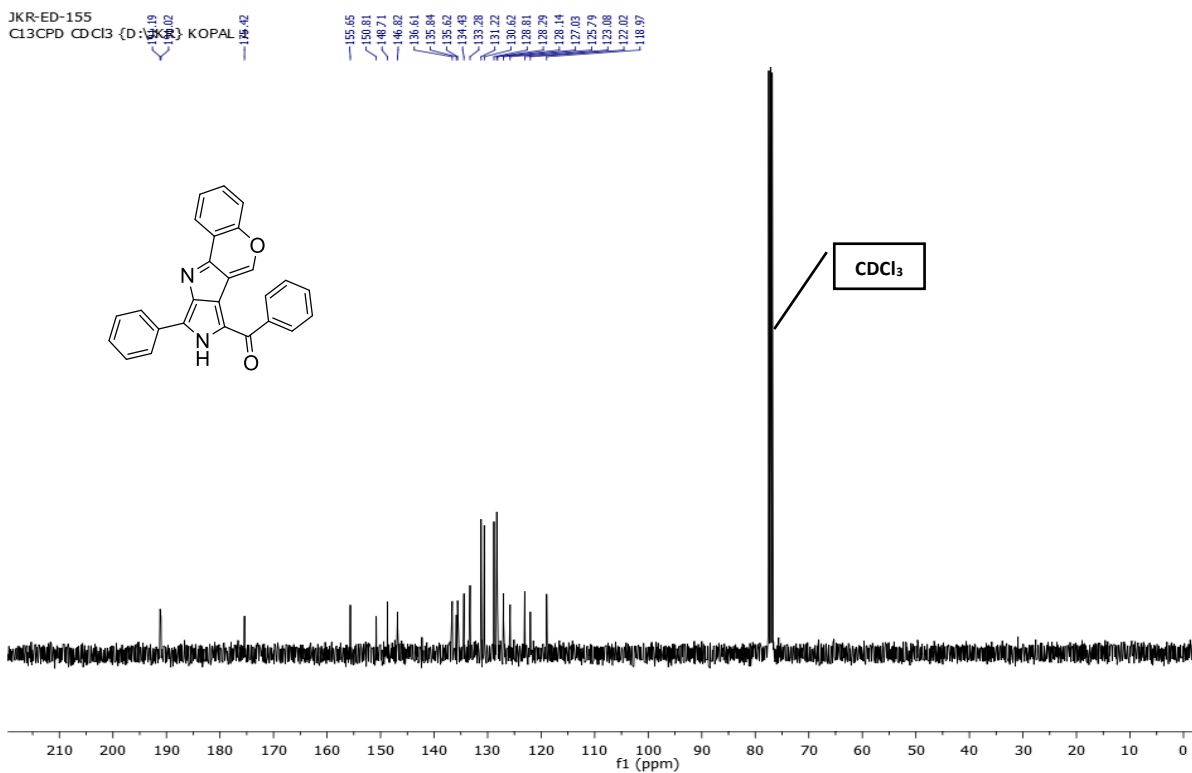

<sup>13</sup>C{<sup>1</sup>H} NMR spectrum of **17a** (100 MHz, CDCl<sub>3</sub>)

JKR-ED-155  
 Cl3DEPT135 CDCl3 {D:\JKR} KOPAL 1

136.48  
 134.30  
 133.15  
 131.10  
 129.09  
 128.69  
 128.16  
 128.91  
 125.66  
 122.94  
 118.84

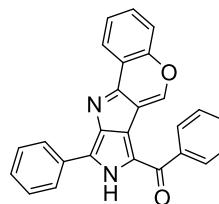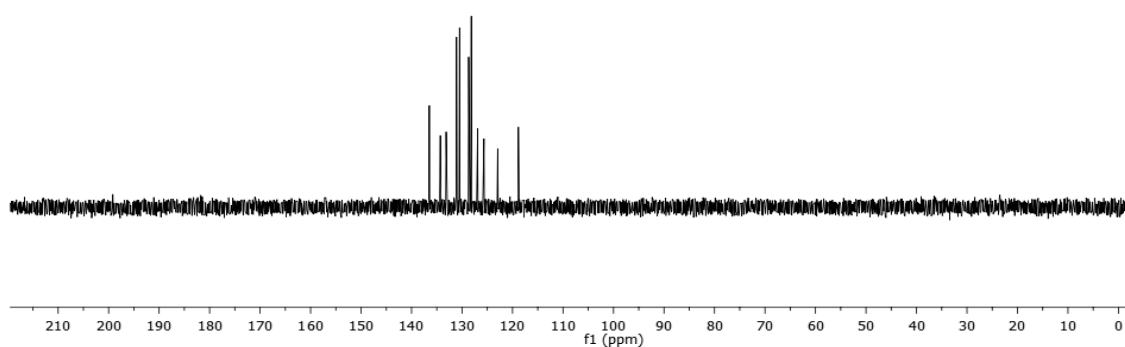

DEPT 135 NMR spectrum of **17a** (100 MHz, CDCl<sub>3</sub>)

| Sample Name  | Position     | Instrument Name | Q-TOF                | User Name              | QTOF-PU/admin       |
|--------------|--------------|-----------------|----------------------|------------------------|---------------------|
| JKR-ED-155   | -1           | Sample          | Sample               | IRM Calibration Status | Success             |
| ata Filename | JKR-ED-155.d | ACQ Method      | Pondicherry Universi | Comment                | ED-JKR-373.0950     |
|              |              |                 |                      | Acquired Time          | 12-10-2018 14:03:22 |

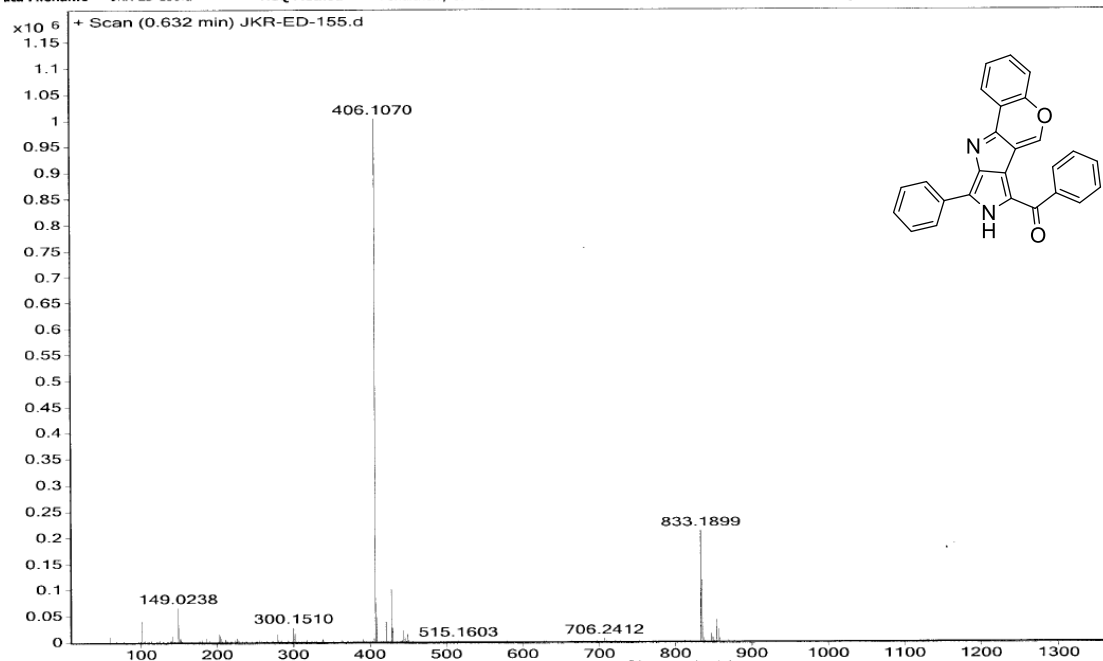

HRMS (ESI) spectrum of **17a**

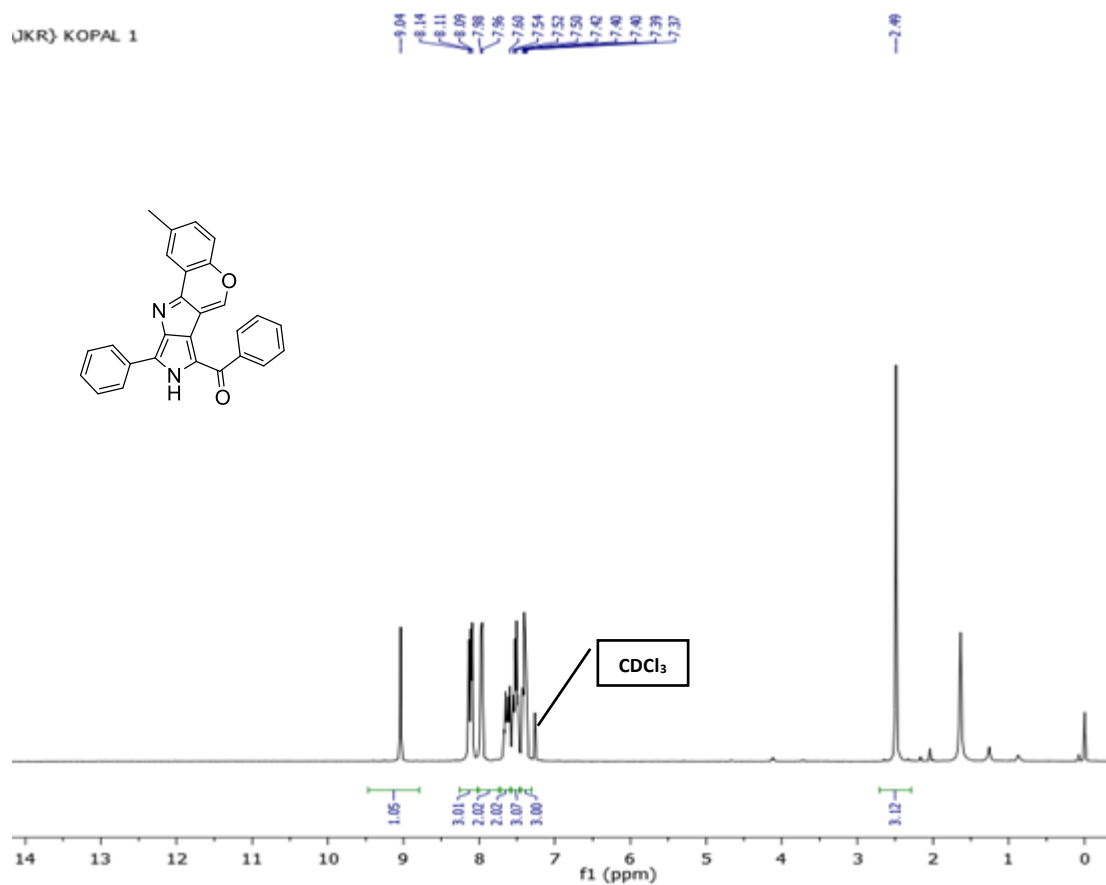

<sup>1</sup>H NMR spectrum of **17b** (400 MHz, CDCl<sub>3</sub>)

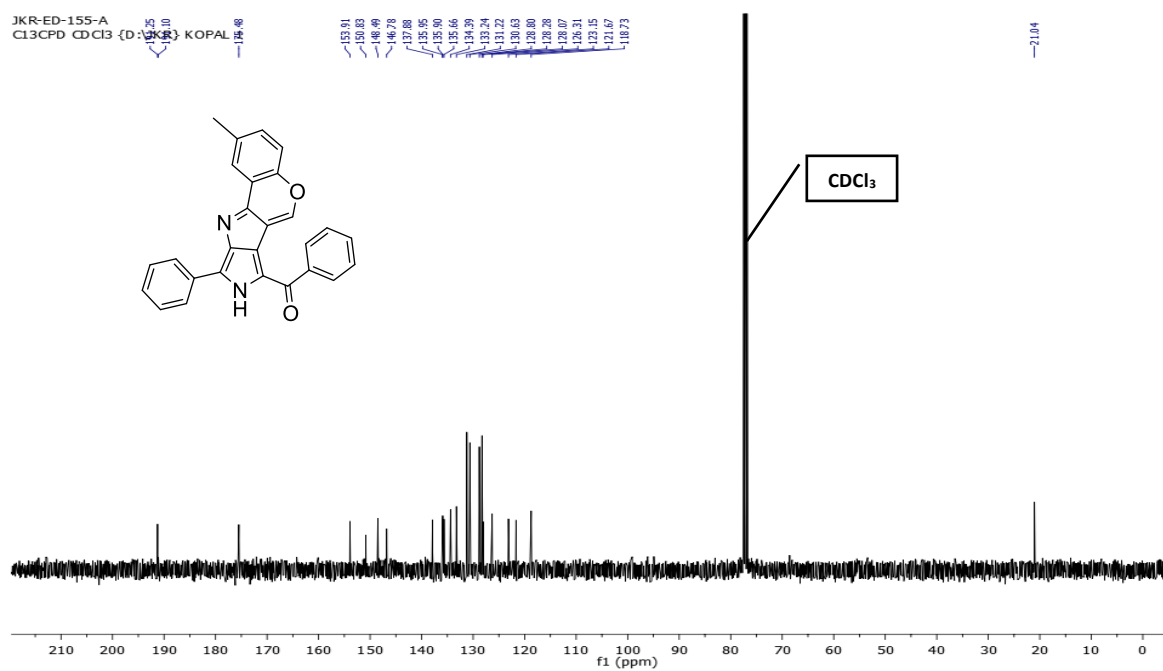

<sup>13</sup>C{<sup>1</sup>H} NMR spectrum of **17b** (100 MHz, CDCl<sub>3</sub>)



JKR-ED-155-A  
 CL3DEPT135 CDCl<sub>3</sub> {D:\JKR} KOPAL 1

137.4  
 134.26  
 133.11  
 131.09  
 130.50  
 128.66  
 128.15  
 126.17  
 123.01  
 118.60

20.90

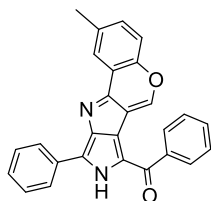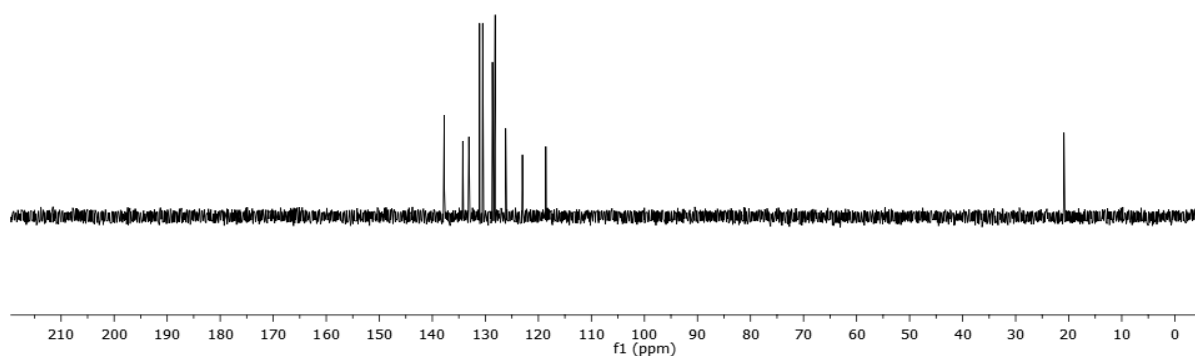

DEPT 135 NMR spectrum of **17b** (100 MHz, CDCl<sub>3</sub>)

|               |               |             |                      |                 |                 |                        |                     |
|---------------|---------------|-------------|----------------------|-----------------|-----------------|------------------------|---------------------|
| Sample Name   | JKR-ED-155A   | Position    |                      | Instrument Name | Q-TOF           | User Name              | QTOF-PU\admin       |
| Inj Vol       | -1            | InjPosition |                      | SampleType      | Sample          | IRM Calibration Status | Success             |
| Data Filename | JKR-ED-155A.d | ACQ Method  | Pondicherry Universi | Comment         | ED-JKR-387.1107 | Acquired Time          | 12-10-2018 13:59:46 |

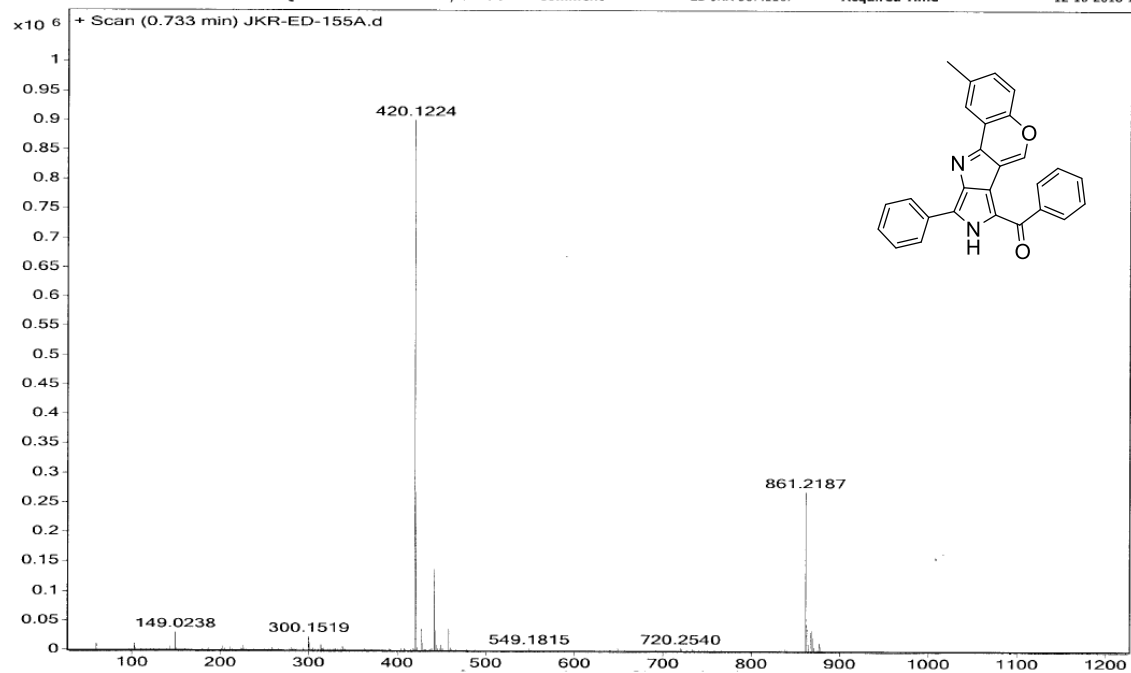

HRMS (ESI) spectrum of **17b**

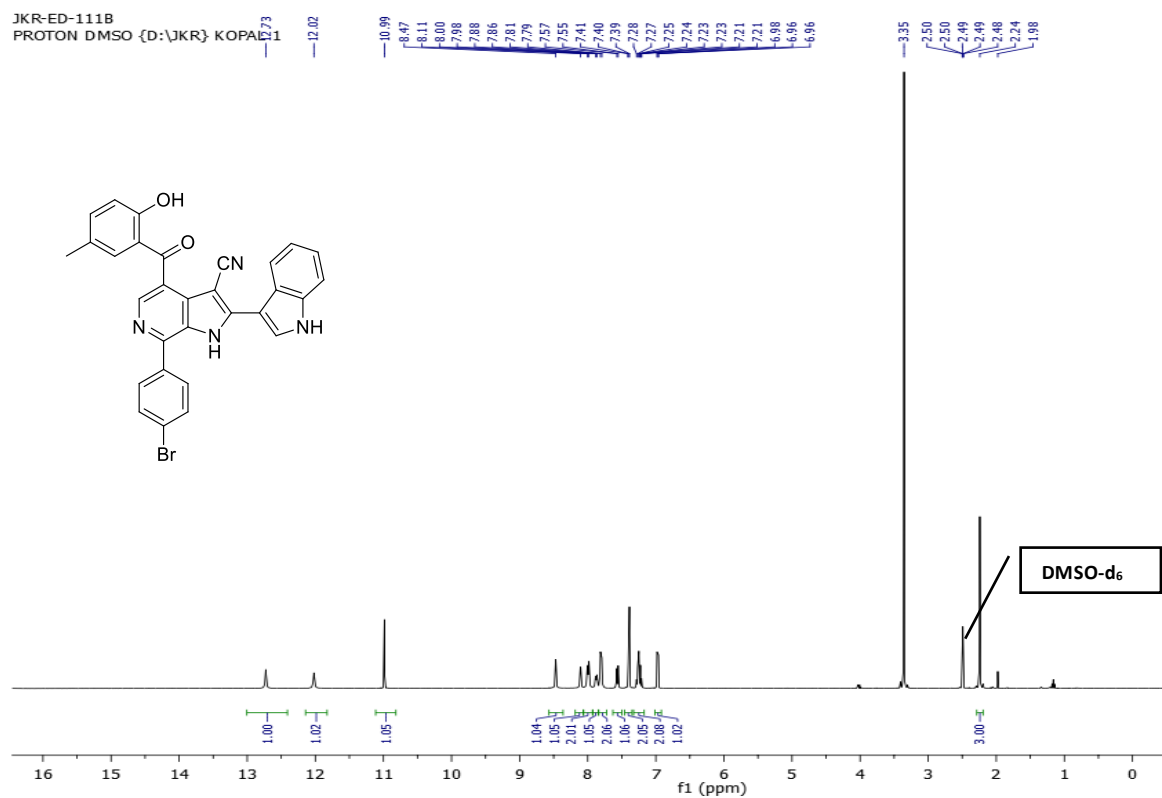

$^1\text{H}$  NMR spectrum of **18a** (400 MHz,  $\text{DMSO}-d_6$ )

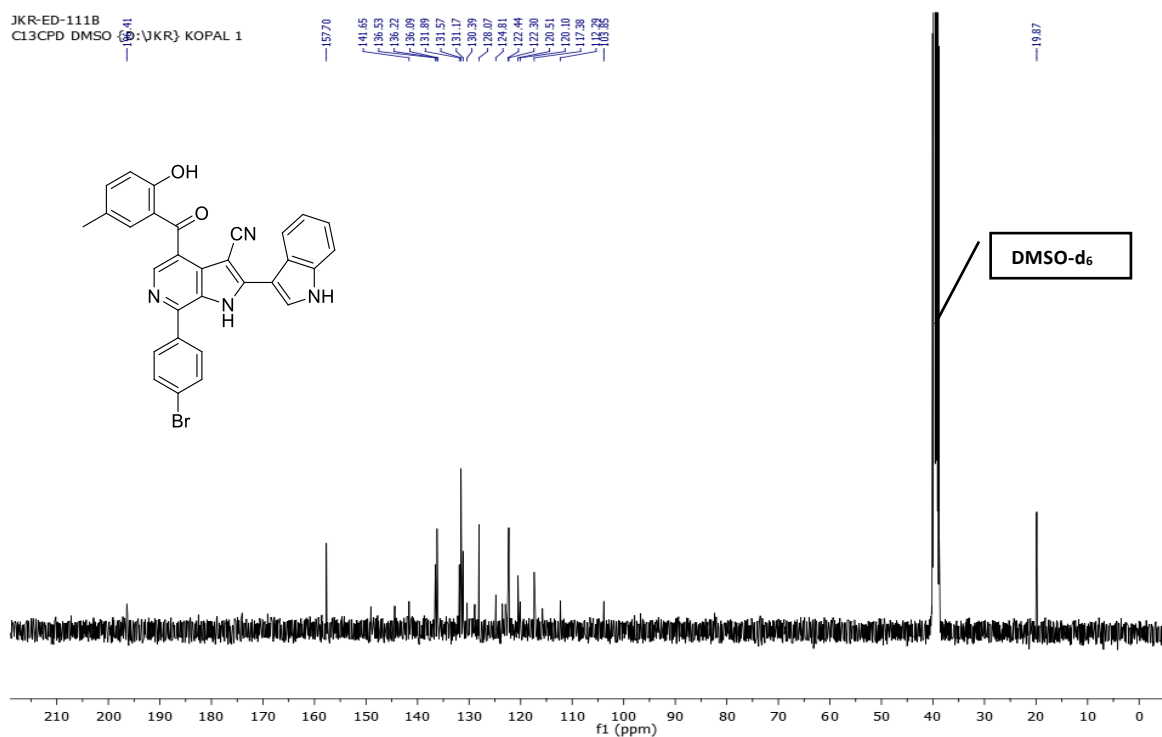

$^{13}\text{C}\{^1\text{H}\}$  NMR spectrum of **18a** (100 MHz,  $\text{DMSO}-d_6$ )

—19.86

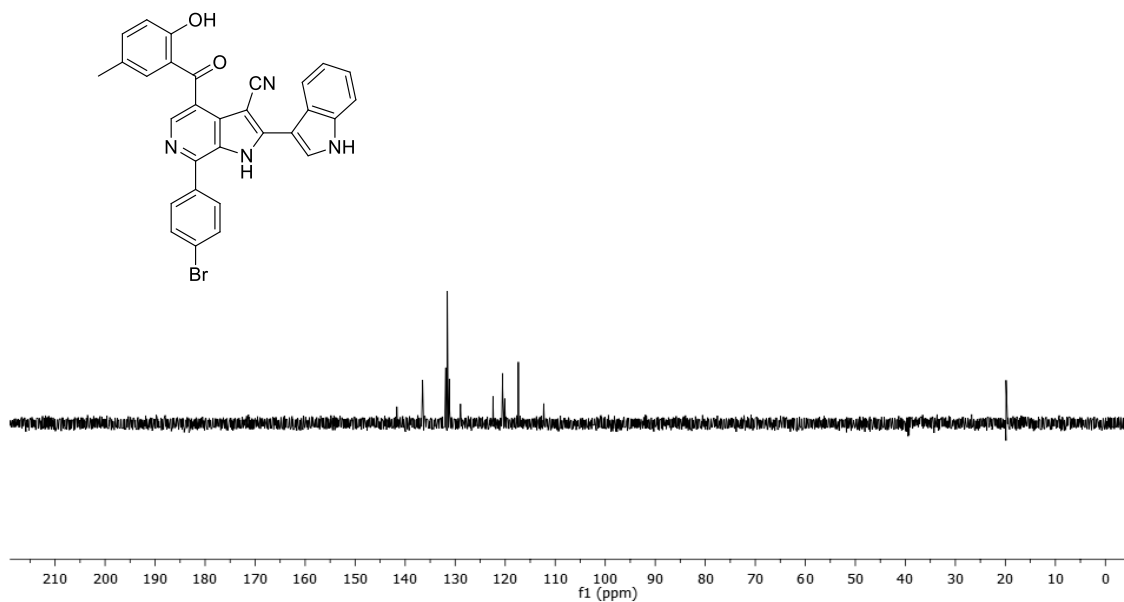DEPT 135 NMR spectrum of **18a** (100 MHz, DMSO-*d*<sub>6</sub>)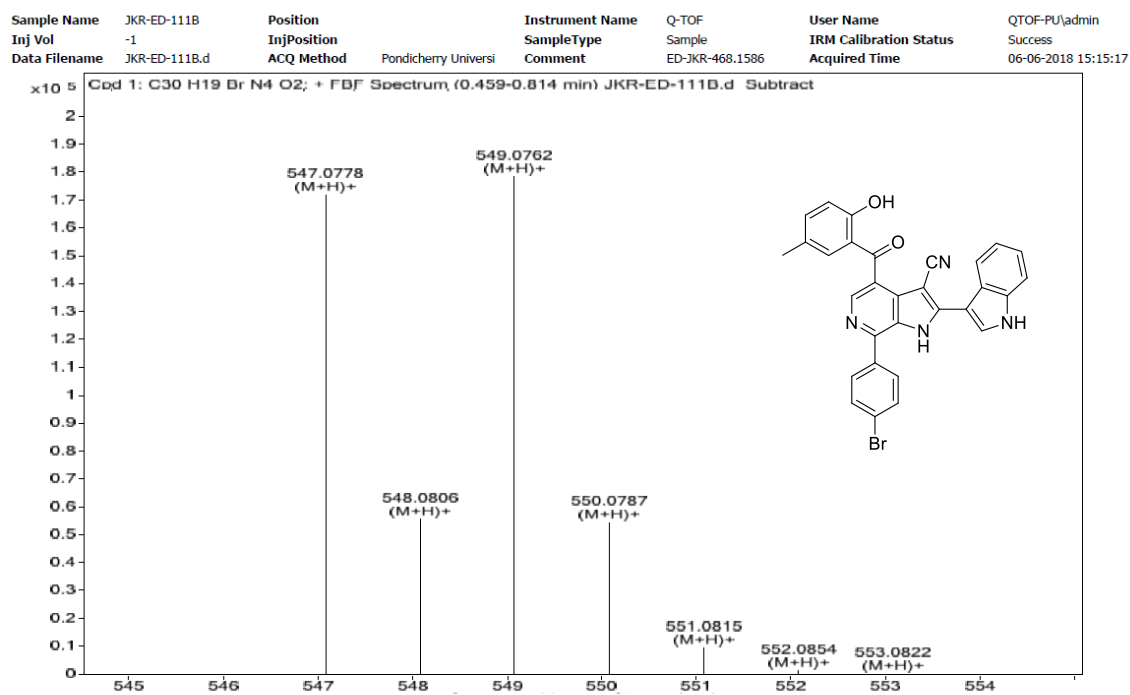

HRMS (ESI) spectrum of **18a**

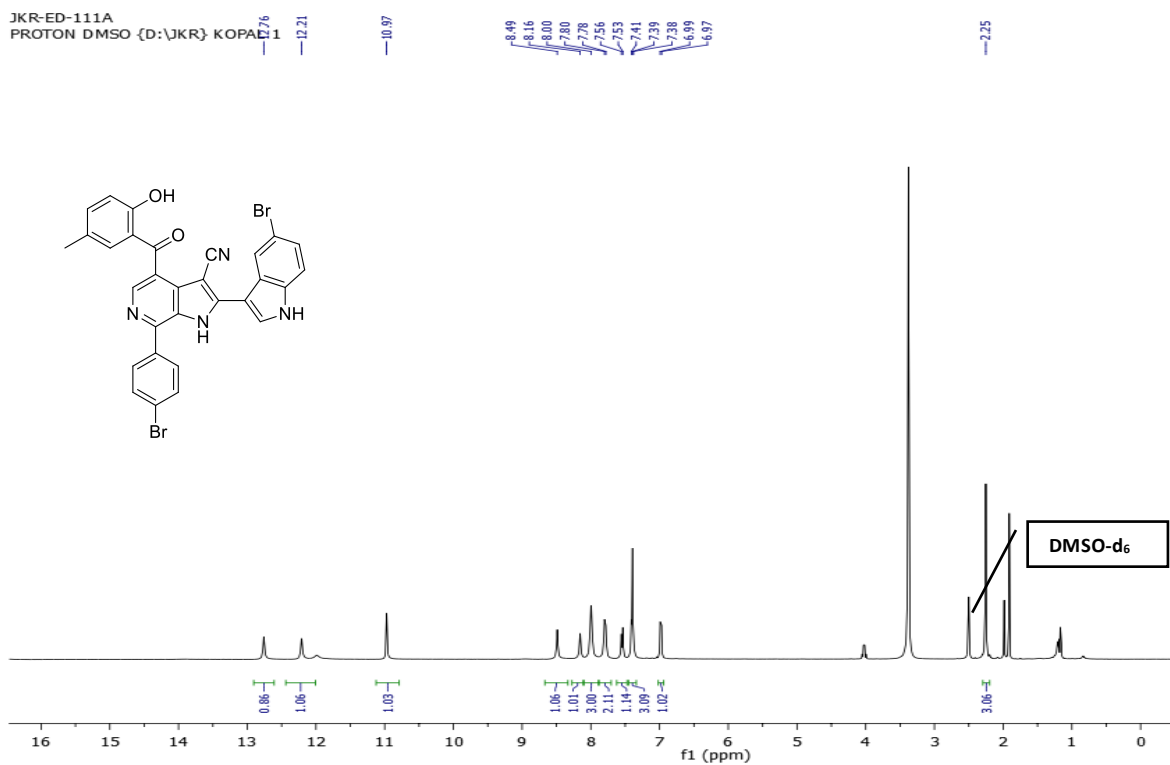

$^1\text{H}$  NMR spectrum of **18b** (400 MHz, DMSO- $d_6$ )

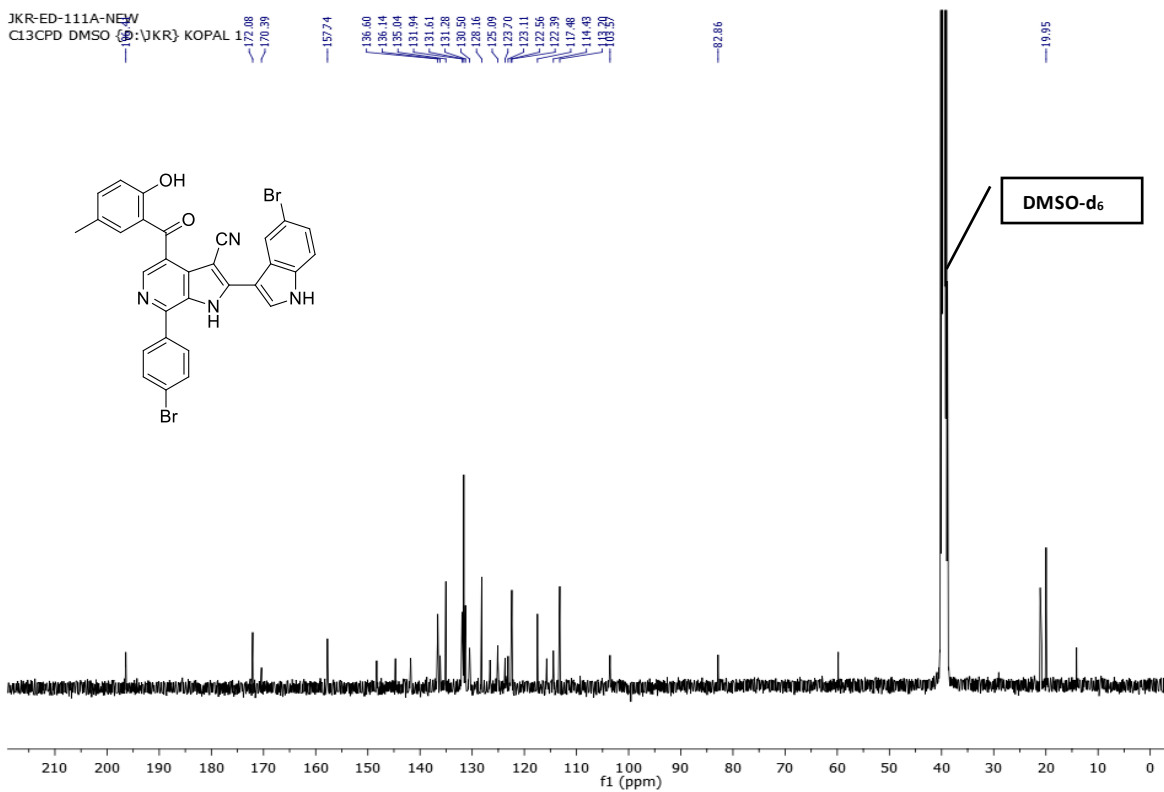

$^{13}\text{C}\{^1\text{H}\}$  NMR spectrum of **18b** (100 MHz, DMSO- $d_6$ )

JKR-ED-111A  
C13DEPT135 DMSO {D:\JKR} KOPAL 1

141.23  
136.51  
135.85  
131.62  
131.20  
130.34  
125.01  
122.49  
117.39  
114.34

19.87

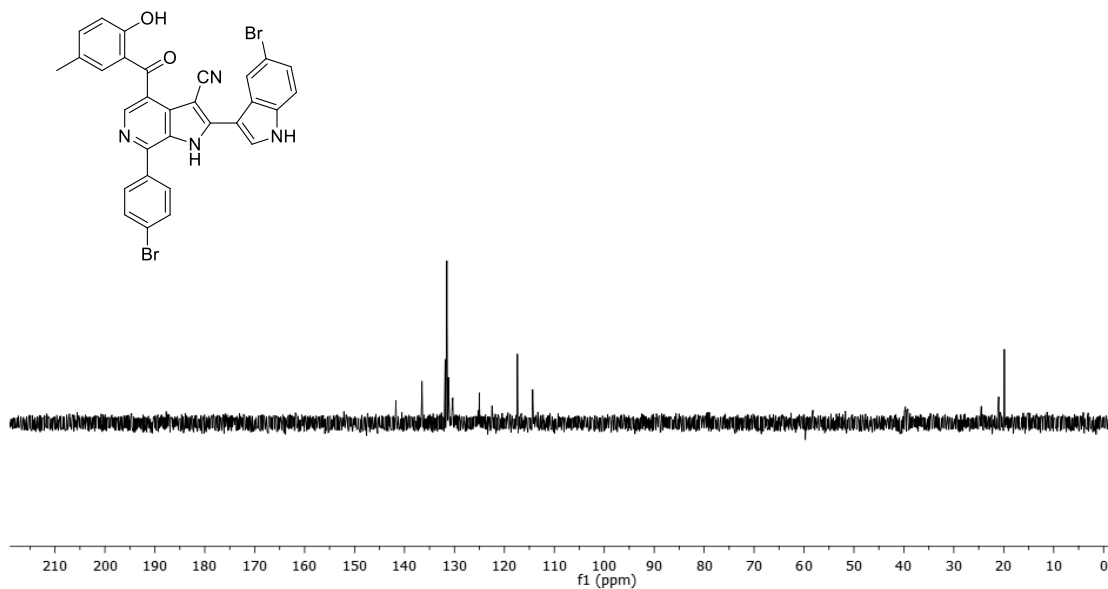

| Sample Name   | JKR-ED-111A    | Position    | Instrument Name | Q-TOF           | User Name              | QTOF-PU\admin       |
|---------------|----------------|-------------|-----------------|-----------------|------------------------|---------------------|
| Inj Vol       | -1             | InjPosition | SampleType      | Sample          | IRM Calibration Status | Success             |
| Data Filename | JKR-ED-111A2.d | ACQ Method  | Comment         | ED-JKR-454.1430 | Acquired Time          | 24-05-2018 12:18:43 |

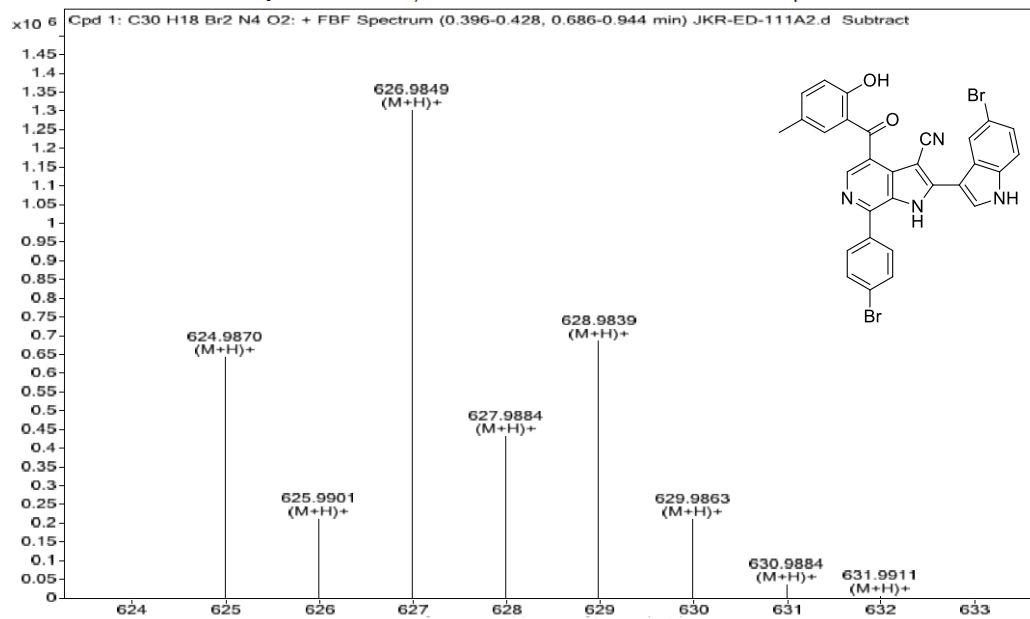

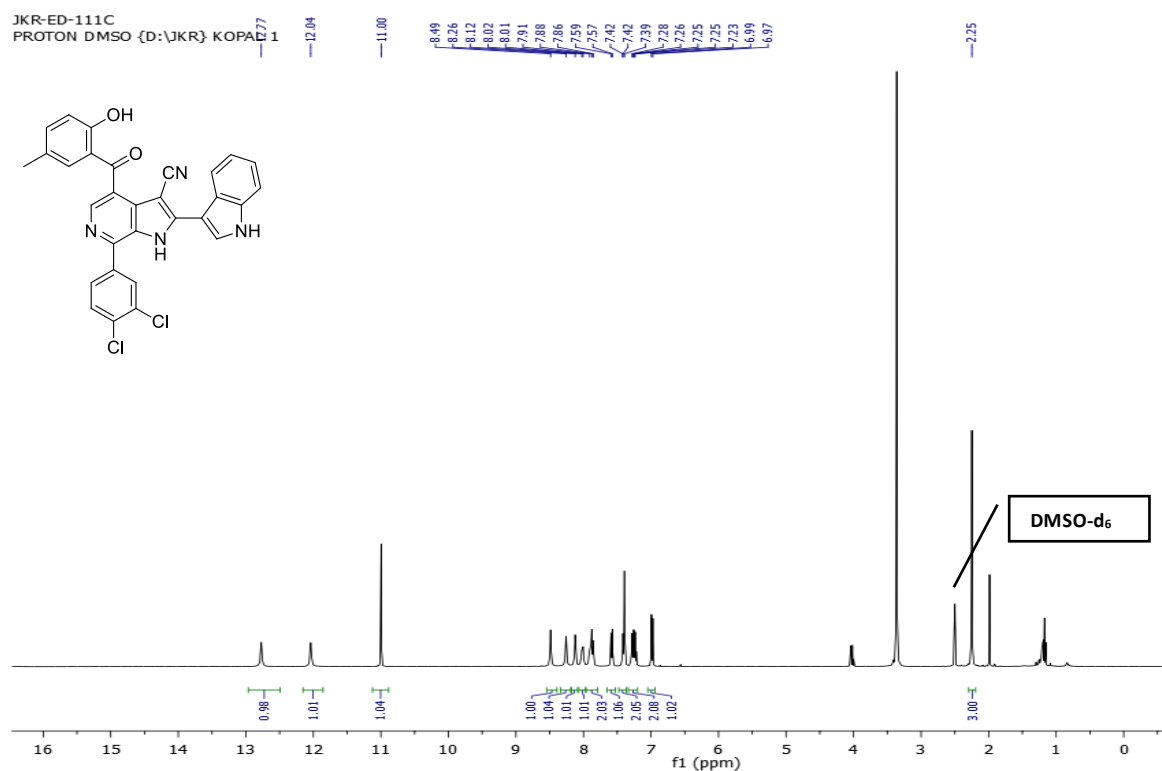

$^1\text{H}$  NMR spectrum of **18c** (400 MHz, DMSO- $d_6$ )

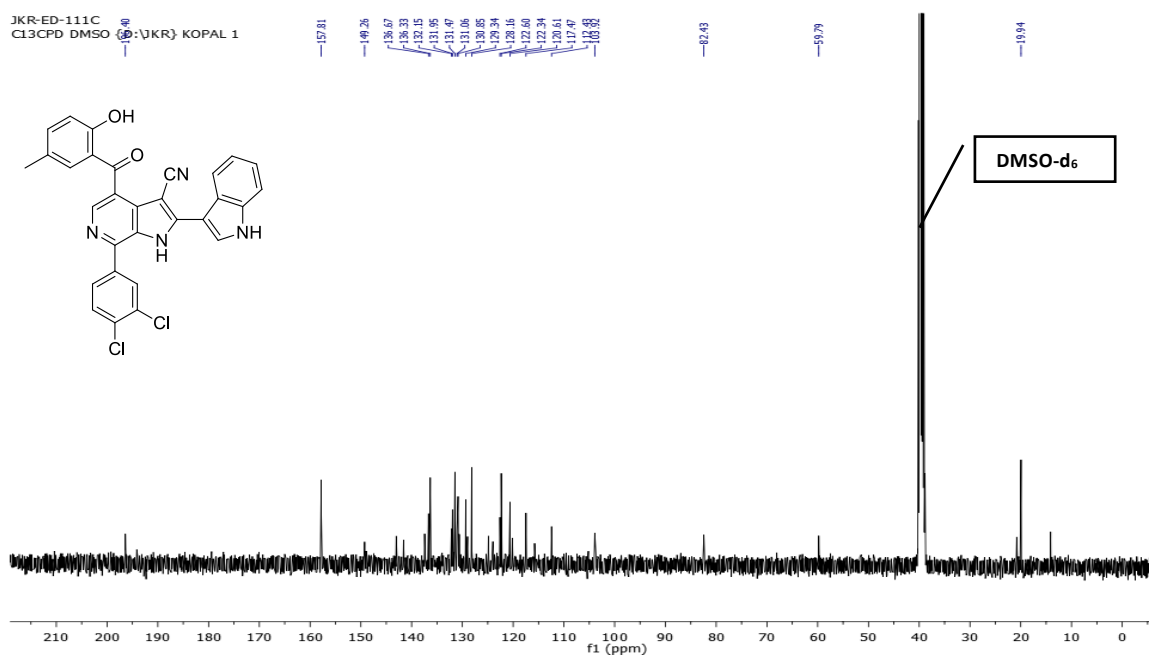

$^{13}\text{C}\{^1\text{H}\}$  NMR spectrum of **18c** (100 MHz, DMSO- $d_6$ )

JKR-ED-111C  
CL3DEPT135 DMSO {D:\JKR} KOPAL 1

141.51  
136.59  
131.87  
130.97  
130.78  
129.26  
128.91  
122.52  
120.54  
120.06  
117.39  
112.35

19.86

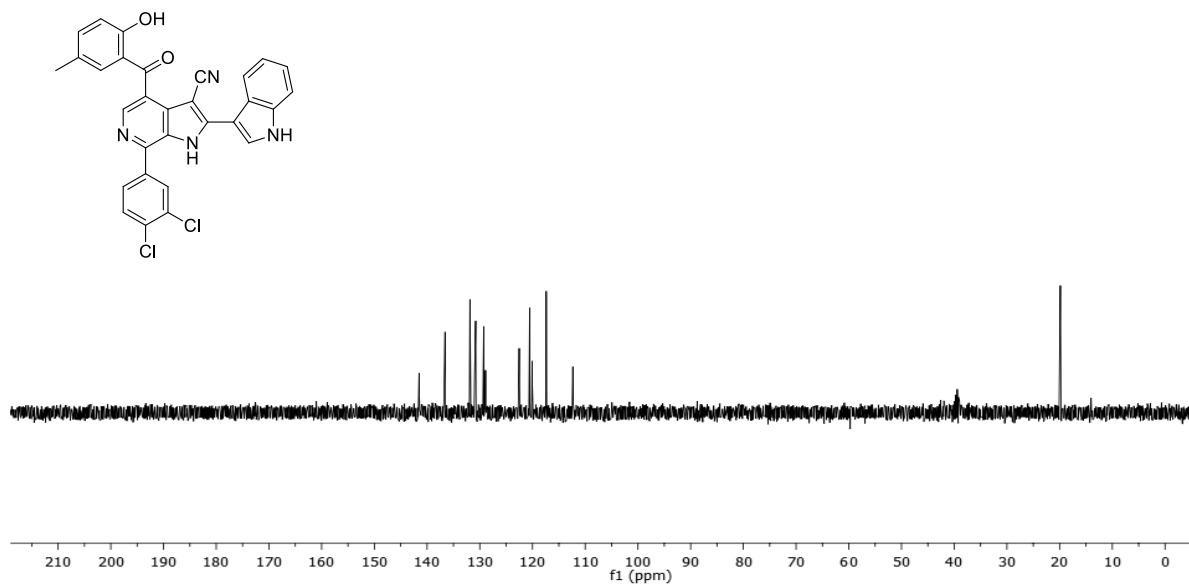

DEPT 135 NMR spectrum of **18c** (100 MHz, DMSO- $d_6$ )

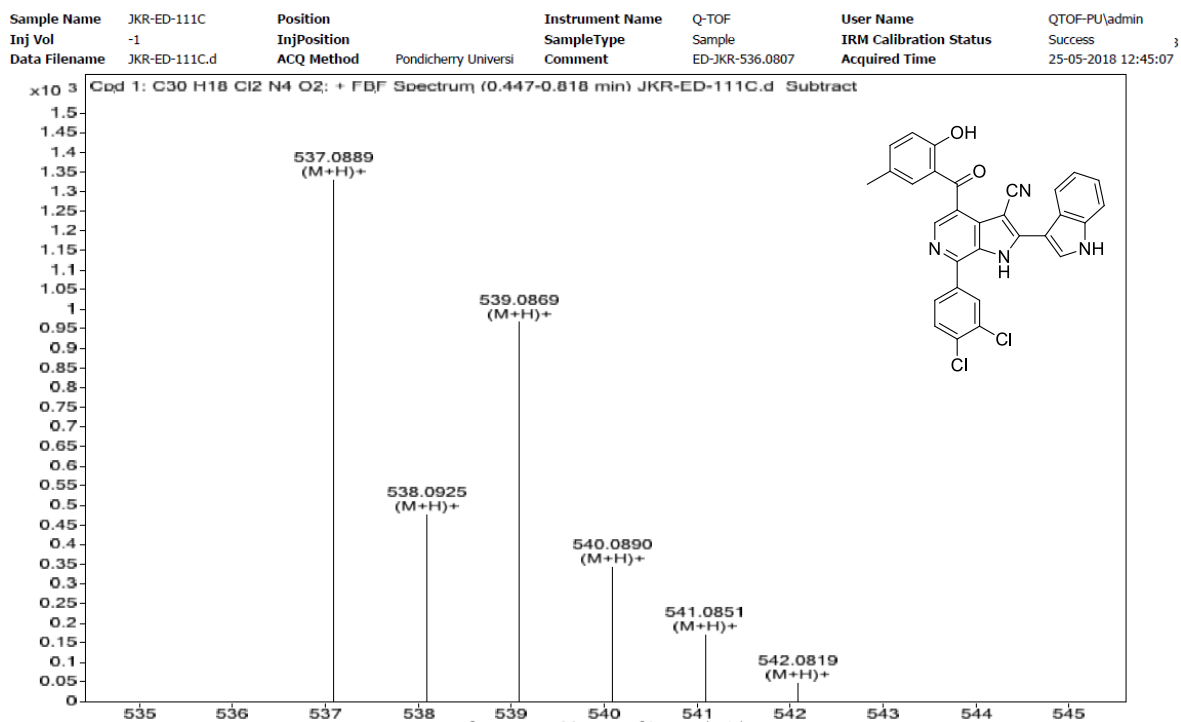

HRMS (ESI) spectrum of **18c**

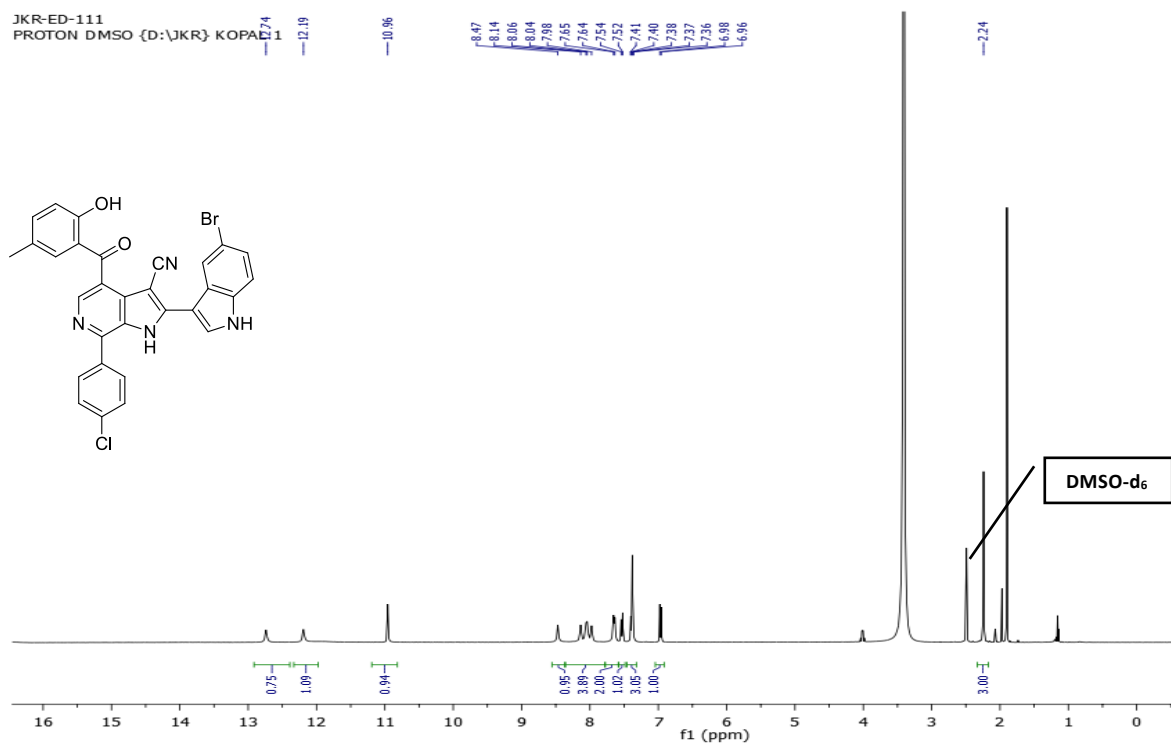

$^1\text{H}$  NMR spectrum of **18d** (400 MHz, DMSO- $d_6$ )

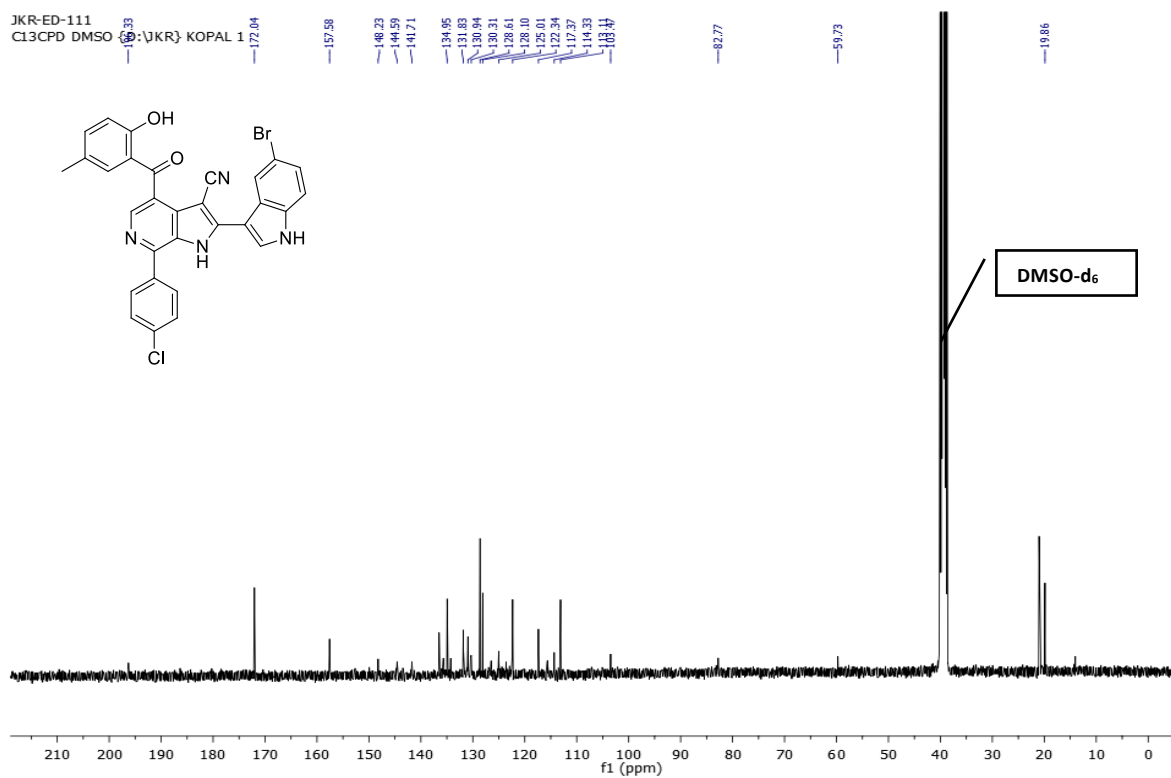

$^{13}\text{C}\{^1\text{H}\}$  NMR spectrum of **18d** (100 MHz, DMSO- $d_6$ )



JKR-ED-111E  
C13DEPT135 DMSO {D:\JKR} KOPAL 1

36.51  
31.85  
30.97  
30.30  
28.60  
25.00  
23.76  
22.49  
17.39  
14.32

198.7

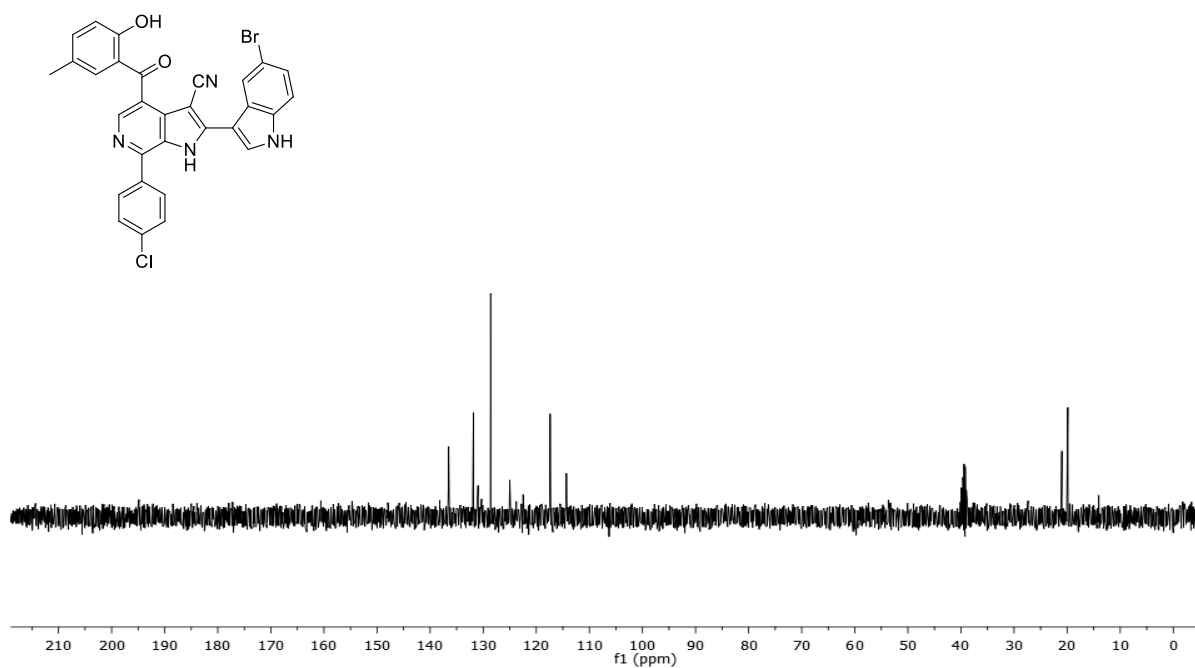

DEPT 135 NMR spectrum of **18d** (100 MHz, DMSO-*d*<sub>6</sub>)

### **III. Experimental Details of X-ray analysis of Compound 4i**

Single crystal of compound **4i** was prepared using DMSO solvent by a slow evaporation method. X-ray diffraction data were collected using Bruker AXS Kappa ApexII CCD diffractometer equipped with graphite monochromated MoK $\alpha$  ( $\lambda=0.71073\text{\AA}$ ) radiation. The single crystal of size ca. 0.25 x 0.22 x 0.18 mm was used for data collection. Data collection, data reduction and absorption correction were performed by APEX2, SAINT-plus and SADABS [v2014/5] programs<sup>1</sup>. The structure was solved by direct methods procedure using SHELXS-97 (Sheldrick, 2008) and refined by full-matrix least-squares procedure on F<sup>2</sup> using SHELXL-2014(Sheldrick, 2015) program<sup>2</sup>. All the non-hydrogen atoms were subjected to anisotropic refinement whereas the hydrogen atoms were refined isotropically. The H-atoms bound to the C-atoms were treated as riding atoms with Uiso(H) set to 1.5Ueq $\odot$  and C–H distance of 0.96 $\text{\AA}$  for CH<sub>3</sub> groups and Uiso(H) set to 1.2Ueq $\odot$  and C–H distance of 0.93 $\text{\AA}$  for aromatic CH. The H atoms bounded to amine nitrogen were refined to constrained distances with Uiso(H) = 1.2 Ueq(N), N—H distances of 0.90(1) $\text{\AA}$ . The final refinement converged to the R-value of 0.0531 for 3824 observed reflections. Crystallographic data **4i** have been deposited with the Cambridge Crystallographic Data Center, (39) CCDC 1881467. Copies of this information may be obtained free of charge from the Director, CCDC, 12 Union Road, Cambridge CB2 1EZ, UK (Fax: +44 1223 336033; e-mail: deposit@ccdc.cam.ac.uk or www.ccdc.cam.ac.uk). Crystal structure determination was performed in the Department of Chemistry, Indian Institute of Technology Madras, Chennai – 600036, INDIA.

1. Bruker, **2014**, SADABS v2014/5, Bruker AXS Inc., Madison, Wisconsin, USA.
2. Sheldrick, G. M. **2015**, *Acta Cryst.* C71, 3–8.

#### IV. ORTEP diagram of compound 4i

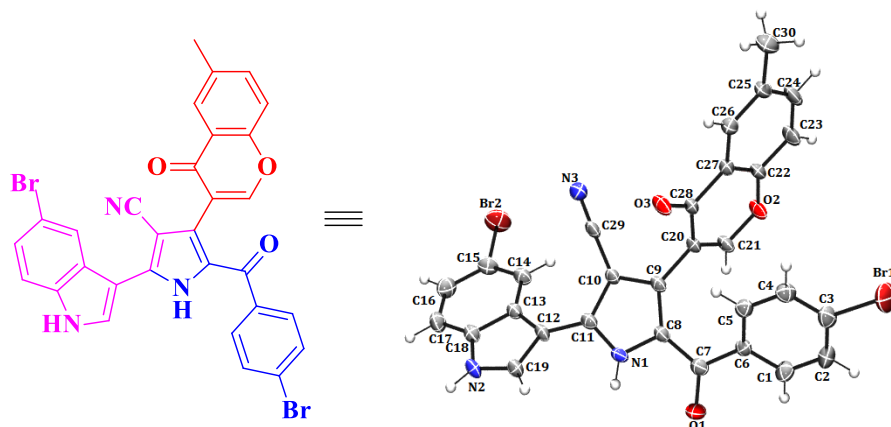

**Figure S1.** Molecular configuration and the atom numbering structure of **4i** crystal. Displacement ellipsoids are drawn at 30% probability level.

## **V. Table S1. Crystal data and structure refinement for 4i**

|                 |                                 |                    |                      |
|-----------------|---------------------------------|--------------------|----------------------|
| Bond precision: | C-C = 0.0066 Å                  |                    | Wavelength = 0.71073 |
| Cell:           | a = 11.6878(4)                  | b = 12.5438(4)     | c = 13.3312(4)       |
|                 | alpha = 70.9079(14)             | beta = 72.8568(15) | gamma = 81.4490(16)  |
| Temperature:    | 296 K                           |                    |                      |
|                 | Calculated                      |                    | Reported             |
| Volume          | 1761.95(10)                     |                    | 1761.95(10)          |
| Space group     | P -1                            |                    | P -1                 |
| Hall group      | -P 1                            |                    | -P 1                 |
| Moiety formula  | C30 H17 Br2 N3 O3, 2(C2 H6 O S) |                    | C34 H29 Br2 N3 O5 S2 |
| Sum formula     | C34 H29 Br2 N3 O5 S2            |                    | C34 H29 Br2 N3 O5 S2 |
| Mr              | 783.52                          |                    | 783.52               |
| Dx,g cm-3       | 1.477                           |                    | 1.477                |
| Z               | 2                               |                    | 2                    |
| Mu (mm-1)       | 2.463                           |                    | 2.463                |
| F000            | 792.0                           |                    | 792.0                |
| F000'           | 791.65                          |                    |                      |
| h,k,lmax        | 13,14,15                        |                    | 13,14,15             |
| Nref            | 6187                            |                    | 6171                 |
| Tmin,Tmax       | 0.546,0.642                     |                    | 0.578,0.666          |
| Tmin'           | 0.535                           |                    |                      |

Correction method= # Reported T Limits: Tmin= 0.578 Tmax=0.666

AbsCorr = MULTI-SCAN

Data completeness = 0.997

Theta(max) = 25.000

R(reflections) = 0.0531( 3824)

wR2(reflections) = 0.1477( 6171)

S = 1.034

Npar = 428

## VI. Green matrix Factors: Atom Economy and E-Factor Calculations

### E-Factor and Atom Economy for each class of compounds

#### E- Factor for compound 4a

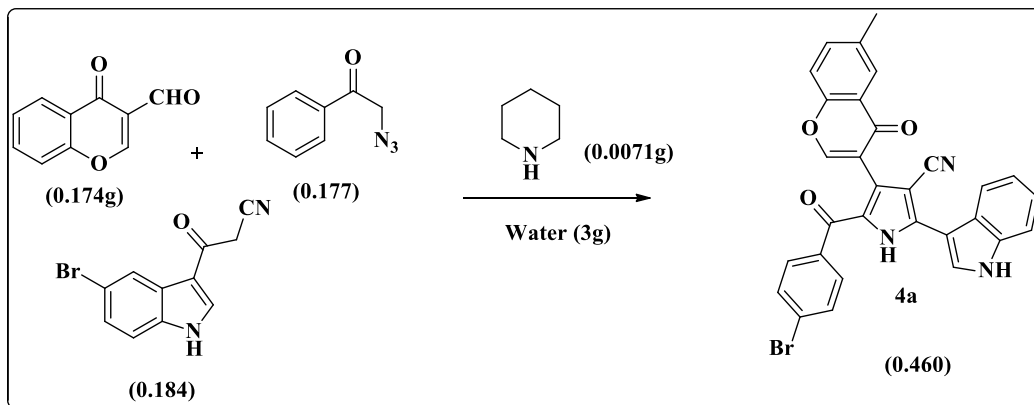

Weight of total starting material – Product weight

$$\text{E-Factor} = \frac{\text{Weight of total starting material} - \text{Product weight}}{\text{Product weight}}$$

$$\text{E-Factor} = \frac{3.5427 - 0.46}{0.46}$$

$$\text{E-Factor} = 6.69$$

#### Atom economy for compound 4a

$$\text{Atom Economy} = \frac{\text{Mass of atoms in the desired product}}{\text{Mass of atoms in the reactant}}$$

$$\text{Atom Economy} = \frac{455 \times 100}{650}$$

$$\text{Atom Economy} = 70.03$$

E- Factor for compound **4q**

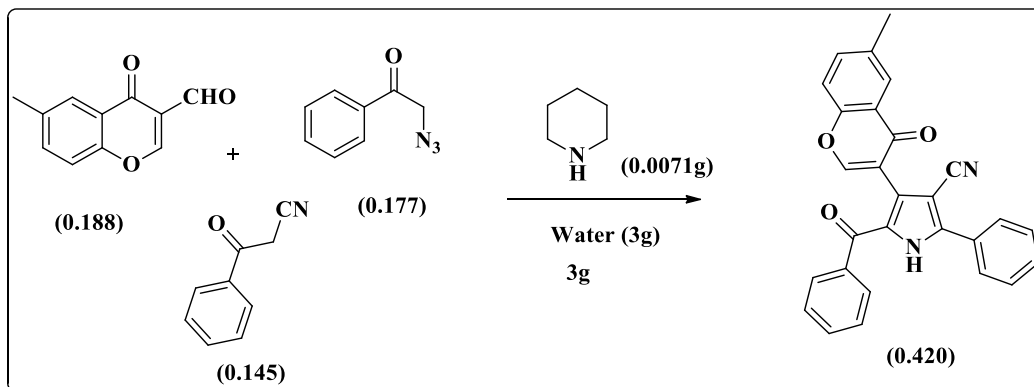

$$\text{E-Factor} = \frac{\text{Weight of total starting material} - \text{Product weight}}{\text{Product weight}}$$

$$\text{E-Factor} = \frac{3.5171 - 0.425}{0.425}$$

$$\text{E-Factor} = 7.27$$

Atom economy for compound **4q**

$$\text{Atom Economy} = \frac{\text{Mass of atoms in the desired product}}{\text{Mass of atoms in the reactant}}$$

$$\text{Atom Economy} = \frac{430 \times 100}{494}$$

$$\text{Atom Economy} = 87.04$$

### E- Factor for compound 8a

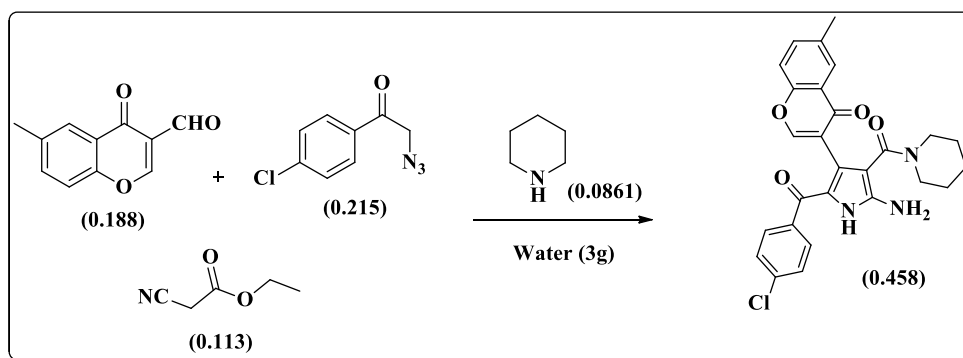

Weight of total starting material – Product weight

$$\text{E-Factor} = \frac{\text{Weight of total starting material} - \text{Product weight}}{\text{Product weight}}$$

$$\text{E-Factor} = \frac{3.602 - 0.458}{0.458}$$

$$\text{E-Factor} = 6.86$$

### Atom economy for compound 8a

$$\text{Atom Economy} = \frac{\text{Mass of atoms in the desired product}}{\text{Mass of atoms in the reactant}}$$

$$\text{Atom Economy} = \frac{489}{627} \times 100$$

$$\text{Atom Economy} = 78.13$$

### E- Factor for compound **10a**

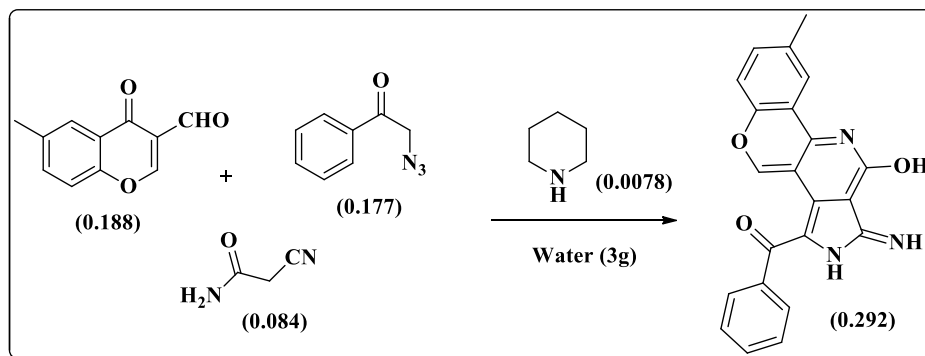

Weight of total starting material – Product weight

$$\text{E-Factor} = \frac{\text{Weight of total starting material} - \text{Product weight}}{\text{Product weight}}$$

$$\text{E-Factor} = \frac{3.456 - 0.292}{0.292}$$

$$\text{E-Factor} = 10.83$$

### Atom economy for compound **10a**

$$\text{Atom Economy} = \frac{\text{Mass of atoms in the desired product}}{\text{Mass of atoms in the reactant}}$$

$$\text{Atom Economy} = \frac{369}{564} \times 100$$

$$\text{Atom Economy} = 65.49$$



E- Factor for compound **12a**

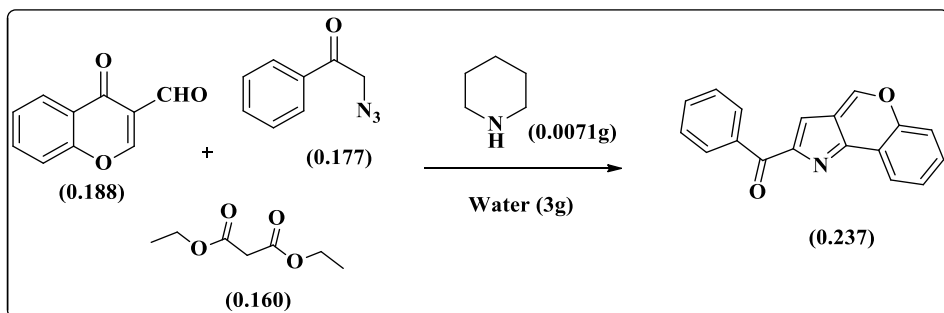

Weight of total starting material – Product weight

$$\text{E-Factor} = \frac{\text{Weight of total starting material} - \text{Product weight}}{\text{Product weight}}$$

$$\text{E-Factor} = \frac{3.53 - 0.237}{0.237}$$

$$\text{E-Factor} = 13.90$$

Atom economy for compound **12a**

$$\text{Atom Economy} = \frac{\text{Mass of atoms in the desired product}}{\text{Mass of atoms in the reactant}}$$

$$\text{Atom Economy} = \frac{273 \times 100}{640}$$

$$\text{Atom Economy} = 42.70$$

E- Factor for compound **15a**

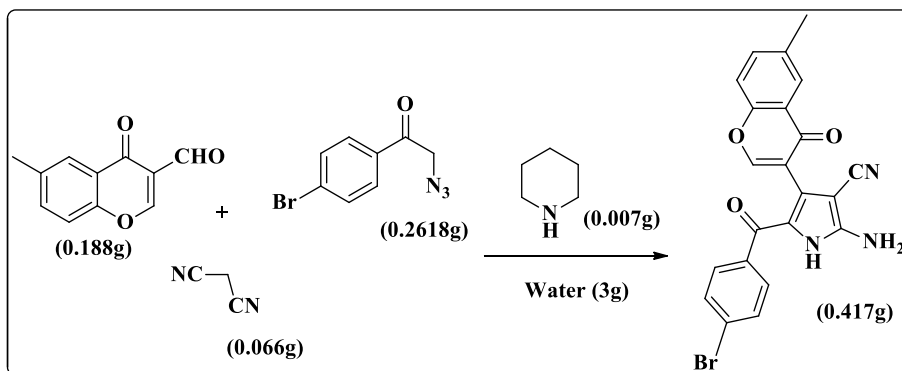

Weight of total starting material – Product weight

$$\text{E-Factor} = \frac{\text{Weight of total starting material} - \text{Product weight}}{\text{Product weight}}$$

$$\text{E-Factor} = \frac{3.523 - 0.417}{0.417}$$

$$\text{E-Factor} = 7.43$$

Atom economy for compound **15a**

$$\text{Atom Economy} = \frac{\text{Mass of atoms in the desired product}}{\text{Mass of atoms in the reactant}}$$

$$\text{Atom Economy} = \frac{447}{625} \times 100$$

$$\text{Atom Economy} = 71.52$$

### E- Factor for compound **17a**

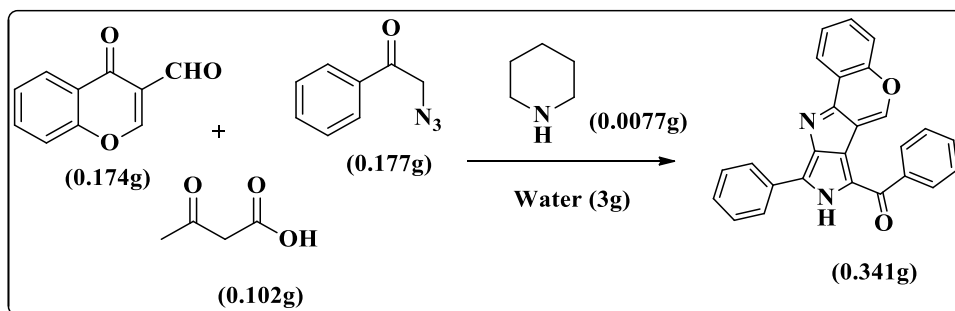

Weight of total starting material – Product weight

$$\text{E-Factor} = \frac{\text{Weight of total starting material} - \text{Product weight}}{\text{Product weight}}$$

$$\text{E-Factor} = \frac{3.489 - 0.341}{0.341}$$

$$\text{E-Factor} = 9.23$$

### Atom economy for compound **17a**

$$\text{Atom Economy} = \frac{\text{Mass of atoms in the desired product}}{\text{Mass of atoms in the reactant}}$$

$$\text{Atom Economy} = \frac{388}{556} \times 100$$

$$\text{Atom Economy} = 69.80$$

### E- Factor for compound **18a**

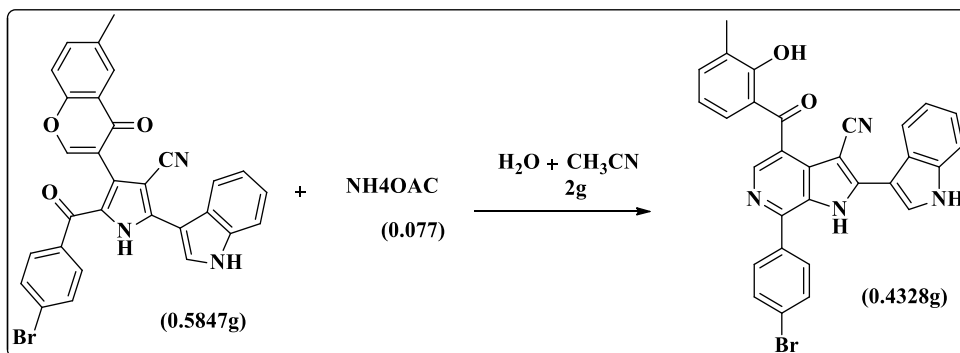

$$\text{E-Factor} = \frac{\text{Weight of total starting material} - \text{Product weight}}{\text{Product weight}}$$

$$\text{E-Factor} = \frac{2.624 - 0.4328}{0.4328}$$

$$\text{E-Factor} = 5.06$$

### Atom economy for compound **18a**

$$\text{Atom Economy} = \frac{\text{Mass of atoms in the desired product}}{\text{Mass of atoms in the reactant}}$$

$$\text{Atom Economy} = \frac{547}{684} \times 100$$

$$\text{Atom Economy} = 80.03$$

## Comparison of E- Factor and Atom Economy of our methodology with other similar reports compound

### E- Factor for similarly reported compound

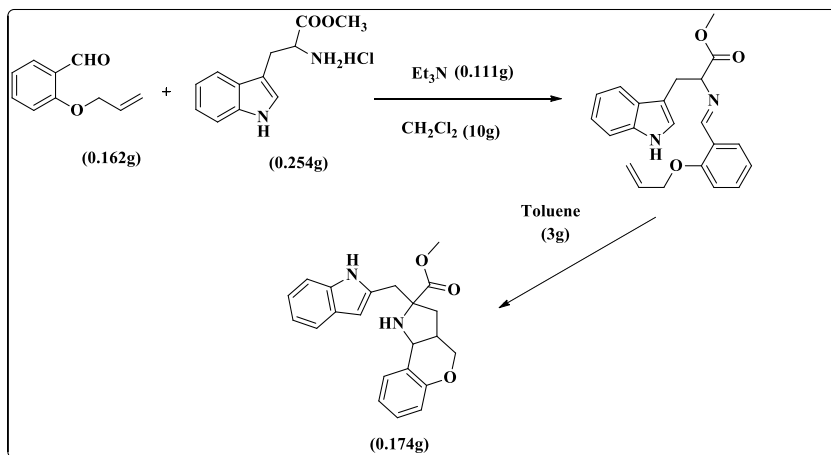

Ref: N. Arumugam R. Raghunathan, , A. I. Almansour, U. Karama, *Bioorg. Med. Chem. Lett.* **2012**, 22, 1375–1379.

Weight of total starting material – Product weight

$$\text{E-Factor} = \frac{\text{Weight of total starting material} - \text{Product weight}}{\text{Product weight}}$$

$$\text{E-Factor} = \frac{13.527 - 0.174}{0.174}$$

$$\text{E-Factor} = 76.74$$

## Comparison of E- Factor and Atom Economy

|                                             | E-Factor | Atom Economy |
|---------------------------------------------|----------|--------------|
| <p> </p> <p><b>Our methodology</b></p>      | 6.69     | 70.03        |
| <p> </p> <p><b>Reported methodology</b></p> | 76.74    | 50.2         |

### Advantages of our methodology:

- 1) Higher atom economy
- 2) Low E factor
- 3) Remarkably eco-friendly solvent *viz* water used as reaction medium
